# Supplementary material for: Anti-inflammatory and protective effects of Pimpinella candolleana on ulcerative colitis in rats: a comprehensive study of quality, chemical composition, and molecular mechanisms
Source: Front Pharmacol. 2024 Apr 5;15:1328977. doi: 10.3389/fphar.2024.1328977 (PMC11026630; doi:10.3389/fphar.2024.1328977)
Supplement: Supplementary file 1 [file Table1.XLSX]

## Sheet: S1
Metabolite qualitative and quantitative results table-Positive ions
ID	rt(min)	m/z	Name	adduct	Formula	INCHIKEY	SMILES	Superclass	Class	Subclass	KEGG	score	A
POS_553	7.618	137.13	(-)-alpha-Terpineol	[M+H-H2O]+		WUOACPNHFRMFPN-SECBINFHSA-N	CC1=CC[C@H](CC1)C(C)(C)O	Lipids and lipid-like molecules	Prenol lipids	Monoterpenoids		0.831	156873
POS_5784	4.688	367.133	(-)-Erythro-Anethole glycol 2-glucoside	[M+Na]+	C16H24O8	JYWSARFDLXXOHT-UHFFFAOYSA-N	COC1=CC=C(C=C1)C(O)C(C)OC2OC(CO)C(O)C(O)C2O	Organic oxygen compounds	Organooxygen compounds	Carbohydrates and carbohydrate conjugates		0.797	4107882
POS_11494	4.781	561.186	(+)-Cycloolivil glucoside	[M+Na]+	C26H34O12	CBHWSKLIWKFSRU-MNAFQOMLSA-N	COC1=CC2=C(C=C1O)[C@@H]([C@@H](CO)[C@](O)(CO)C2)C3=CC=C(O[C@@H]4O[C@H](CO)[C@@H](O)[C@H](O)[C@H]4O)C(=C3)OC	Lignans, neolignans and related compounds	Lignan glycosides			0.824	1612829
POS_1925	9.266	219.172	(+)-Nootkatone	[M+H]+	C15H22O	WTOYNNBCKUYIKC-JMSVASOKSA-N	C[C@@H]1CC(=O)C=C2[C@]1(C[C@@H](CC2)C(=C)C)C					0.866	663465
POS_8859	12.162	467.269	(19R)-9-Acetyl-19-hydroxy-10,14-dimethyl-20-oxopentacyclo[11.8.0.0<2,10>.0<4,9 >.0<14,19>]henicos-17-yl acetate	[M+Na]+	C27H40O5	DMAXEADUOQCSHM-UHFFFAOYSA-N	CC(=O)OC1CCC2(C)C3CCC4(C)C(CC5CCCCC45C(C)=O)C3CC(=O)C2(O)C1	Lipids and lipid-like molecules	Steroids and steroid derivatives	Steroid esters		0.815	865276
POS_4259	3.212	317.116	(1E,4E)-1,5-Bis(4-methoxyphenyl)penta-1,4-dien-3-one	[M+Na]+	C19H18O3	IOZVKDXPBWBUKY-LQIBPGRFSA-N	COC1=CC=C(C=CC(=O)C=CC2=CC=C(OC)C=C2)C=C1	Benzenoids	Phenol ethers	Anisoles		0.805	184847
POS_7239	8.81	415.207	(1S,2R,4aR,8aR)-1-Acetoxy-7-isopropylidene-1,4a-dimethyl-6-oxodecahydro-2-naphthalenyl 2,3-dimethyl-2-oxiranecarboxylate	[M+Na]+	C22H32O6	APZBLWQCTHVAMR-XRZTVBGOSA-N	CC1OC1(C)C(=O)O[C@@H]2CC[C@]3(C)CC(=O)C(C[C@H]3[C@]2(C)OC(C)=O)=C(C)C	Lipids and lipid-like molecules	Prenol lipids	Sesquiterpenoids		0.878	4633501
POS_10559	0.735	527.147	(1S,4aS,7aS)-7-[[(E)-3-phenylprop-2-enoyl]oxymethyl]-1-[(2S,3R,4S,5S,6R)-3,4,5-trihydroxy-6-(hydroxymethyl)oxan-2-yl]oxy-1,4a,5,7a-tetrahydrocyclopenta[c]pyran-4-carboxylic acid	[M+Na]+	C25H28O11	VTQUQEWGIJRVHB-VHPPWYILSA-N	OCC1OC(OC2OC=C(C3CC=C(COC(=O)C=CC4=CC=CC=C4)C23)C(O)=O)C(O)C(O)C1O	Lipids and lipid-like molecules	Prenol lipids	Terpene glycosides		0.769	176977
POS_788	9.081	153.123	(1S,4R)-(+)-Fenchone	[M+H]+		LHXDLQBQYFFVNW-XCBNKYQSSA-N	CC1(C)[C@@H]2CC[C@@](C)(C2)C1=O	Lipids and lipid-like molecules	Prenol lipids	Monoterpenoids		0.762	56670
POS_4482	12.065	325.208	(1S,4S,9S,10R,13R)-5,9-Dimethyl-14-methylidenetetracyclo[11.2.1.01,10.04,9]hexadecane-5-carboxylic acid	[M+Na]+	C20H30O2	NIKHGUQULKYIGE-ADPGWCSISA-N	C[C@@]12CCC[C@](C)([C@H]1CC[C@@]34C[C@@H](CC[C@@H]23)C(=C)C4)C(O)=O	Lipids and lipid-like molecules	Prenol lipids	Diterpenoids		0.736	2666513
POS_10422	11.779	522.347	(2-Hydroxy-3-octadec-9-enoyloxypropyl) 2-(trimethylazaniumyl)ethyl phosphate	[M+H]+	C26H52NO7P	YAMUFBLWGFFICM-UHFFFAOYSA-N	CCCCCCCCC=CCCCCCCCC(=O)OCC(O)CO[P]([O-])(=O)OCC[N+](C)(C)C	Lipids and lipid-like molecules	Glycerophospholipids	Glycerophosphocholines		0.8	629580
POS_10329	10.909	518.316	(2-Hydroxy-3-octadeca-6,9,12-trienoyloxypropyl) 2-(trimethylazaniumyl)ethyl phosphate	[M+H]+	C26H48NO7P	MRTUWVDDQVMUCR-UHFFFAOYSA-N	CCCCCC=CCC=CCC=CCCCCC(=O)OCC(O)CO[P]([O-])(=O)OCC[N+](C)(C)C	Lipids and lipid-like molecules	Glycerophospholipids	Glycerophosphocholines		0.752	378812
POS_10373	11.169	520.335	(2-Hydroxy-3-octadeca-9,12-dienoyloxypropyl) 2-(trimethylazaniumyl)ethyl phosphate	[M+H]+	C26H50NO7P	SPJFYYJXNPEZDW-UHFFFAOYSA-N	CCCCCC=CCC=CCCCCCCCC(=O)OCC(O)CO[P]([O-])(=O)OCC[N+](C)(C)C	Lipids and lipid-like molecules	Glycerophospholipids	Glycerophosphocholines		0.836	319145
POS_16212	8.611	821.453	(24Z)-26-(Hexopyranosyloxy)-1,21-dihydroxy-9,19-cyclolanost-24-en-3-yl hexopyranoside	[M+Na]+	C42H70O14	ZTYDPVHKIPHQAR-YXSASFKJSA-N	CC(COC1OC(CO)C(O)C(O)C1O)=CCCC(CO)C2CCC3(C)C4CCC5C(C)(C)C(CC(O)C56CC46CCC23C)OC7OC(CO)C(O)C(O)C7O	Lipids and lipid-like molecules	Steroids and steroid derivatives	Steroidal glycosides		0.723	989889
POS_5556	9.566	359.214	(2E,6E,10Z)-12-Hydroxy-10-(hydroxymethyl)-6-methyl-2-(4-methylpent-3-enyl)dodeca-2,6,10-trienoic acid	[M+Na]+	C20H32O4	GWVCYAYKRPLWGK-AAMZJHKISA-N	CC(C)=CCCC(=CCCC(C)=CCCC(CO)=CCO)C(O)=O	Lipids and lipid-like molecules	Prenol lipids	Diterpenoids		0.75	42719
POS_5445	5.54	355.169	(2R,3S,4S,5R,6S)-2-(hydroxymethyl)-6-[4-(hydroxymethyl)-1-propan-2-ylcyclohex-3-en-1-yl]oxyoxane-3,4,5-triol	[M+Na]+	C16H28O7	WBDMFFSFFQSHFV-MUGRSDNVSA-N	CC(C)C1(CCC(=CC1)CO)OC2OC(CO)C(O)C(O)C2O	Lipids and lipid-like molecules	Prenol lipids	Terpene glycosides		0.816	2359604
POS_3636	12.604	293.279	(2R)-1-(5-Hydroxy-3-methylpentyl)-2,5,5,8a-tetramethyldecahydro-2-naphthalenol	[M-H2O+H]+	C20H38O2	MCHQEVJMCLOQAZ-AKMRJOLWSA-N	CC(CCO)CCC1[C@](C)(O)CCC2C(C)(C)CCCC12C	Lipids and lipid-like molecules	Prenol lipids	Diterpenoids		0.729	1570928
POS_16142	7.269	815.406	(2S,3R,4R,5R,6S)-2-[(2R,3S,4R,5R,6R)-4,5-dihydroxy-2-(hydroxymethyl)-6-[[7-[2-hydroxy-1-[3,4,5-trihydroxy-6-(hydroxymethyl)oxan-2-yl]oxyethyl]-1,1,4a,7-tetramethyl-3,4,4b,5,6,8,10,10a-octahydro-2H-phenanthren-2-yl]oxy]oxan-3-yl]oxy-6-methyloxane-3,4,5-triol	[M+Na]+	C38H64O17	IYTSQVVPSDQONH-BINIWEQPSA-N	CC1OC(OC2C(CO)OC(OC3CCC4(C)C5CCC(C)(CC5=CCC4C3(C)C)C(CO)OC6OC(CO)C(O)C(O)C6O)C(O)C2O)C(O)C(O)C1O	Lipids and lipid-like molecules	Prenol lipids	Terpene glycosides		0.703	25912
POS_15494	4.979	765.256	(2S,3R,4S,5S,6R)-2-[4-[(3S,3aR,6S,6aR)-6-[3,5-Dimethoxy-4-[(2S,3R,4S,5S,6R)-3,4,5-trihydroxy-6-(hydroxymethyl)oxan-2-yl]oxyphenyl]-1,3,3a,4,6,6a-hexahydrofuro[3,4-c]furan-3-yl]-2,6-dimethoxyphenoxy]-6-(hydroxymethyl)oxane-3,4,5-triol	[M+Na]+	C34H46O18	FFDULTAFAQRACT-XKBSQSBASA-N	COC1=C(OC2OC(CO)C(O)C(O)C2O)C(=CC(=C1)C3OCC4C3COC4C5=CC(=C(OC6OC(CO)C(O)C(O)C6O)C(=C5)OC)OC)OC	Lignans, neolignans and related compounds	Lignan glycosides			0.724	30514
POS_6612	4.194	395.089	(2S,3S,4S,5R,6R)-6-(3-benzoyloxy-2-hydroxypropoxy)-3,4,5-trihydroxyoxane-2-carboxylic acid	[M+Na]+	C16H20O10	DLZMKPZOEYKXHQ-MQCRQNCBSA-N	OC(COC1OC(C(O)C(O)C1O)C(O)=O)COC(=O)C2=CC=CC=C2	Organic oxygen compounds	Organooxygen compounds	Carbohydrates and carbohydrate conjugates		0.76	111256
POS_3176	6.613	277.102	(2S)-4-Hydroxy-2-(2-hydroxypropan-2-yl)-7-methyl-2,3-dihydrofuro[3,2-g]chromen-5-one	[M+H]+	C15H16O5	LJSWMDKKEBOERP-LBPRGKRZSA-N	CC1=CC(=O)C2=C(O1)C=C3OC(CC3=C2O)C(C)(C)O	Organoheterocyclic compounds	Benzopyrans	1-benzopyrans		0.909	291281
POS_7841	3.536	433.16	(2S)‐2‐(2‐aminoacetamido)‐3‐(4‐cyanophenyl)‐N‐(9H‐fluoren‐2‐yl)propanamide	[M+Na]+	C25H22N4O2	WNVKQPTYEZCTFN-QHCPKHFHSA-N	NCC(=O)N[C@@H](CC1=CC=C(C=C1)C#N)C(=O)NC2=CC3=C(C=C2)C4=C(C3)C=CC=C4	Organic acids and derivatives	Carboxylic acids and derivatives	Amino acids, peptides, and analogues		0.784	176810
POS_3880	7.082	303.116	(3As,6S,7R,8aR)-8-hydroxy-6,8-dimethyl-3-methylidenespiro[4,5,6,8a-tetrahydro-3aH-cyclohepta[b]furan-7,5'-oxolane]-2,2'-dione	[M+Na]+	C15H20O5	IRPFOXRBPHCCTG-CZLFTNFUSA-N	C[C@H]1CC[C@@H]2[C@@H](OC(=O)C2=C)C(C)(O)[C@@]13CCC(=O)O3	Lipids and lipid-like molecules	Prenol lipids	Terpene lactones		0.73	188462
POS_5828	1.883	369.11	(4-Hydroxy-3,5-dimethoxyphenyl)methyl-beta-D-glucopyranoside	[M+Na]+	C15H22O9	VZSGMNVXQXYFPI-UHFFFAOYSA-N	COC1=C(O)C(=CC(=C1)COC2OC(CO)C(O)C(O)C2O)OC	Organic oxygen compounds	Organooxygen compounds	Carbohydrates and carbohydrate conjugates		0.792	410708
POS_7953	2.88	437.097	(5-Benzoyloxy-4,6-dihydroxy-3-methoxycyclohexen-1-yl)methyl benzoate	[M+K]+	C22H22O7	HITZIDGSAVZVQH-UHFFFAOYSA-N	COC1C=C(COC(=O)C2=CC=CC=C2)C(O)C(OC(=O)C3=CC=CC=C3)C1O	Benzenoids	Benzene and substituted derivatives	Benzoic acids and derivatives		0.793	84387
POS_1247	12.208	181.082	(5E,8Z)-4,7-dihydroxy-2-methyl-2,3,4,7-tetrahydrooxecin-10-one	[M-H2O+H]+	C10H14O4	MKPZLFSGCUYQEY-IAROGAJJSA-N	CC1CC(O)C=CC(O)C=CC(=O)O1	Organoheterocyclic compounds	Oxocins			0.706	151922
POS_3999	9.453	307.223	(6E)-Heptadeca-6,16-diene-1,2,4-triol	[M+Na]+	C17H32O3	XGZOTDFONIAWEC-VAWYXSNFSA-N	OCC(O)CC(O)C\\C=C\\CCCCCCCCC=C	Lipids and lipid-like molecules	Fatty Acyls	Fatty alcohols		0.713	70112
POS_5729	3.743	365.117	(7E,13E)-9,15-Dihydroxy-4,10,16-trimethyl-1,5,11-trioxacyclohexadeca-7,13-diene-2,6,12-trione	[M+Na]+	C16H22O8	MJMMUATWVTYSFD-YDFGWWAZSA-N	CC1CC(=O)OC(C)C(O)C=CC(=O)OC(C)C(O)C=CC(=O)O1	Phenylpropanoids and polyketides	Macrolides and analogues			0.753	50997
POS_11295	9.291	553.291	(all-E)-beta-Cryptoxanthin	[M+H]+	C40H56O	DMASLKHVQRHNES-FKKUPVFPSA-N	CC(=CC=CC=C(C)C=CC=C(C)C=CC1=C(C)CC(O)CC1(C)C)C=CC=C(C)C=CC2=C(C)CCCC2(C)C	Lipids and lipid-like molecules	Prenol lipids	Tetraterpenoids		0.729	476877
POS_4568	9.031	328.242	(E)-4-[(1R,2S,3S,4R,8As)-2,3,4-trihydroxy-2,5,5,8a-tetramethyl-3,4,4a,6,7,8-hexahydro-1H-naphthalen-1-yl]but-3-en-2-one	[M+NH4]+	C18H30O4	GUVJPXABQYFWPD-GSZDNMEJSA-N	CC(=O)C=CC1C(C)(O)C(O)C(O)C2C(C)(C)CCCC12C	Lipids and lipid-like molecules	Prenol lipids	Sesquiterpenoids		0.751	173436
POS_8981	7.231	471.212	(R)-Linalyl beta-vicianoside	[M+Na]+	C21H36O10	OKNPZRJNRSGKME-HUHXKEGASA-N	CC(C)=CCC[C@@](C)(O[C@@H]1O[C@H](CO[C@@H]2OC[C@H](O)[C@H](O)[C@H]2O)[C@@H](O)[C@H](O)[C@H]1O)C=C	Lipids and lipid-like molecules	Fatty Acyls	Fatty acyl glycosides		0.815	2233890
POS_3680	5.612	295.183	(S)-[(2R,5R)-5-Ethenyl-1-azabicyclo[2.2.2]octan-2-yl]-quinolin-4-ylmethanol	[M+H]+	C19H22N2O	KMPWYEUPVWOPIM-FGVBSWQGSA-N	O[C@H]([C@H]1C[C@@H]2CCN1C[C@@H]2C=C)C3=C4C=CC=CC4=NC=C3	Alkaloids and derivatives	Cinchona alkaloids			0.757	111609
POS_443	1.075	130.096	(S)-2-(Pyrrolidin-2-yl)acetic acid	[M+H]+	C6H11NO2	ADSALMJPJUKESW-YFKPBYRVSA-N	OC(=O)CC1CCCN1	Organoheterocyclic compounds	Pyrrolidines			0.734	645143
POS_670	0.713	146.113	(S)-3-Amino-5-methyl-hexanoic acid	[M+H]+	C7H15NO2	MLYMSIKVLAPCAK-LURJTMIESA-N	CC(C)CC(N)CC(O)=O	Organic acids and derivatives	Carboxylic acids and derivatives	Amino acids, peptides, and analogues		0.744	62868
POS_1016	4.874	167.067	(S)-Suspensaside	[M+H]+	C9H10O3	UILPJVPSNHJFIK-UHFFFAOYSA-N	COC1=CC=C(C(C)=O)C(=C1)O	Organic oxygen compounds	Organooxygen compounds	Carbonyl compounds		0.72	66857
POS_7901	3.766	435.139	[(2R,3R,4S,5R,6R)-3,5-Dihydroxy-2-(hydroxymethyl)-6-[(2R,3R,4S,5S,6R)-3,4,5-trihydroxy-6-(hydroxymethyl)oxan-2-yl]oxyoxan-4-yl] 2-methylpropanoate	[M+Na]+	C16H28O12	QVYMNCVNZVHQEC-HPBJJQKWSA-N	CC(C)C(=O)O[C@H]1[C@H](O)[C@@H](CO)O[C@H](O[C@H]2O[C@H](CO)[C@@H](O)[C@H](O)[C@H]2O)[C@@H]1O	Organic oxygen compounds	Organooxygen compounds	Carbohydrates and carbohydrate conjugates		0.783	474148
POS_14765	7.779	715.39	[(2R,3R,4S,5S,6R)-3-Acetyloxy-2-(acetyloxymethyl)-5-hexanoyloxy-6-[(2S,3R)-2,3,4-trihydroxybutoxy]oxan-4-yl] 14-hydroxytetradecanoate	[M+Na]+	C34H60O14	QYCCCSUFDHWKRW-KSHKLCIXSA-N	CCCCCC(=O)OC1C(OCC(O)C(O)CO)OC(COC(C)=O)C(OC(C)=O)C1OC(=O)CCCCCCCCCCCCCO	Lipids and lipid-like molecules	Saccharolipids			0.712	27753
POS_7815	9.117	432.231	[1,14-Dihydroxy-8-(hydroxymethyl)-4,12,12,15-tetramethyl-5-oxo-13-tetracyclo[8.5.0.02,6.011,13]pentadeca-3,8-dienyl] acetate	[M+ACN+H]+	C22H30O6	WZYGIALDVOKLLL-UHFFFAOYSA-N	CC1C(O)C2(OC(C)=O)C(C3C=C(CO)CC4C(C=C(C)C4=O)C13O)C2(C)C	Lipids and lipid-like molecules	Prenol lipids	Diterpenoids		0.704	131878
POS_15052	8.499	733.401	[17-(2,6-Dihydroxy-6-methyl-3-oxoheptan-2-yl)-3-hydroxy-4,4,9,13,14-pentamethyl-2-[3,4,5-trihydroxy-6-(hydroxymethyl)oxan-2-yl]oxy-2,3,7,8,10,11,12,15,16,17-decahydro-1H-cyclopenta[a]phenanthren-16-yl] acetate	[M+Na]+	C38H62O12	VJWYQRXPCZNDKS-UHFFFAOYSA-N	CC(=O)OC1CC2(C)C3CC=C4C(CC(OC5OC(CO)C(O)C(O)C5O)C(O)C4(C)C)C3(C)CCC2(C)C1C(C)(O)C(=O)CCC(C)(C)O	Lipids and lipid-like molecules	Steroids and steroid derivatives	Steroidal glycosides		0.756	136151
POS_15197	12.086	743.381	[2-[4-Hydroxy-2,5-bis(hydroxymethyl)-3-(3-methylbutanoyloxy)oxolan-2-yl]oxy-6-(hydroxymethyl)-4,5-bis(2-methylpropanoyloxy)oxan-3-yl] decanoate	[M+Na]+	C35H60O15	LOTLMZWGLBOKFL-UHFFFAOYSA-N	CCCCCCCCCC(=O)OC1C(OC(CO)C(OC(=O)C(C)C)C1OC(=O)C(C)C)OC2(CO)OC(CO)C(O)C2OC(=O)CC(C)C	Lipids and lipid-like molecules	Saccharolipids			0.701	55572
POS_8507	0.658	455.111	[3-Hydroxy-1-(4-methoxy-7-oxofuro[3,2-g]chromen-9-yl)oxy-3-methylbutan-2-yl] (E)-2-methylbut-2-enoate	[M+K]+	C22H24O8	QUSMURJIBTWAOP-WUXMJOGZSA-N	COC1=C2C=COC2=C(OCC(OC(=O)C(C)=CC)C(C)(C)O)C3=C1C=CC(=O)O3	Phenylpropanoids and polyketides	Coumarins and derivatives	Furanocoumarins		0.785	358988
POS_5458	11.767	355.28	[4,6-diethyl-6-(4-ethyl-2-methyloctyl)-3H-1,2-dioxin-3-yl]acetic acid	[M+H]+	C21H38O4	PGURXSLSPSOJSS-ZHOBMISMNA-N	O=C(O)CC1OOC(C=C1CC)(CC)CC(C)CC(CC)CCCC					0.747	1240662
POS_11126	4.113	547.19	[4a,7-Dihydroxy-7-methyl-1-[3,4,5-trihydroxy-6-(hydroxymethyl)oxan-2-yl]oxy-1,5,6,7a-tetrahydrocyclopenta[c]pyran-5-yl] (E)-3-(4-methoxyphenyl)prop-2-enoate	[M+Na]+	C25H32O12	LGFYNKGLEKBLDA-VMPITWQZSA-N	COC1=CC=C(C=CC(=O)OC2CC(C)(O)C3C(OC=CC23O)OC4OC(CO)C(O)C(O)C4O)C=C1	Lipids and lipid-like molecules	Prenol lipids	Terpene glycosides		0.701	341095
POS_8911	4.548	469.161	[8-[2-(3-Methylbutanoyloxy)propan-2-yl]-2-oxo-8,9-dihydrofuro[2,3-h]chromen-9-yl] 3-methylbutanoate	[M+K]+	C24H30O7	KPLBOWKEQXYXSD-UHFFFAOYSA-N	CC(C)CC(=O)OC1C(OC2=C1C3=C(C=CC(=O)O3)C=C2)C(C)(C)OC(=O)CC(C)C	Phenylpropanoids and polyketides	Coumarins and derivatives	Furanocoumarins		0.798	717271
POS_1092	5.142	172.128	1-(Aminomethyl)cyclohexaneacetate	[M+H]+	C9H17NO2	UGJMXCAKCUNAIE-UHFFFAOYSA-N	NCC1(CCCCC1)CC(O)=O	Organic acids and derivatives	Carboxylic acids and derivatives	Amino acids, peptides, and analogues		0.768	247828
POS_7162	4.524	413.134	1-[4-[2-(7-Methoxy-1,3-benzodioxol-5-yl)ethyl]phenoxy]-3-methylbutane-2,3-diol	[M+K]+	C21H26O6	CAXDNOAMAQQQMX-UHFFFAOYSA-N	COC1=C2OCOC2=CC(=C1)CCC3=CC=C(OCC(O)C(C)(C)O)C=C3	Phenylpropanoids and polyketides	Stilbenes			0.79	132240
POS_848	0.856	158.078	1-Acetylproline	[M+H]+	C7H11NO3	GNMSLDIYJOSUSW-UHFFFAOYSA-N	CC(=O)N1CCCC1C(O)=O	Organic acids and derivatives	Carboxylic acids and derivatives	Amino acids, peptides, and analogues		0.782	40167
POS_14318	7.019	689.377	1-O-[(2alpha,3beta,5xi,6beta,9xi,18xi)-2,3,6,23-Tetrahydroxy-28-oxoolean-12-en-28-yl]-beta-D-glucopyranose	[M+Na]+	C36H58O11	DZVIFFMYEULLBY-NSOPSRGASA-N	CC1(C)CCC2(CCC3(C)C(=CCC4C5(C)CC(O)C(O)C(C)(CO)C5C(O)CC34C)C2C1)C(=O)OC6OC(CO)C(O)C(O)C6O	Lipids and lipid-like molecules	Prenol lipids	Terpene glycosides		0.789	1804782
POS_13999	7.506	673.382	1-O-[(2alpha,3beta,5xi,9xi,18xi,19alpha)-2,3,19-trihydroxy-28-oxoolean-12-en-28-yl]-beta-D-glucopyranose,	[M+Na]+	C36H58O10	CUOZRGBQTOSWAY-IFBFNMMESA-N	CC1(C)CCC2(CCC3(C)C(=CCC4C5(C)CC(O)C(O)C(C)(C)C5CCC34C)C2C1O)C(=O)OC6OC(CO)C(O)C(O)C6O	Lipids and lipid-like molecules	Prenol lipids	Triterpenoids		0.765	395826
POS_14568	6.588	703.354	1-O-[(2alpha,3beta,5xi,9xi,18xi)-2,3,19,24-Tetrahydroxy-24,28-dioxoolean-12-en-28-yl]-beta-D-glucopyranose	[M+Na]+	C36H56O12	NZNHJGNBLPBNLU-YIKANFTBSA-N	CC1(C)CCC2(CCC3(C)C(=CCC4C5(C)CC(O)C(O)C(C)(C5CCC34C)C(O)=O)C2C1O)C(=O)OC6OC(CO)C(O)C(O)C6O	Lipids and lipid-like molecules	Prenol lipids	Triterpenoids		0.746	128685
POS_1523	9.069	198.18	1-Octylpyrrolidin-2-one	[M+H]+	C12H23NO	WPPOGHDFAVQKLN-UHFFFAOYSA-N	CCCCCCCCN1CCCC1=O	Organoheterocyclic compounds	Pyrrolidines	N-alkylpyrrolidines		0.753	92200
POS_9696	11.641	496.332	1-Palmitoylphosphatidylcholine	[M+H]+	C24H50NO7P	ASWBNKHCZGQVJV-UHFFFAOYSA-N	CCCCCCCCCCCCCCCC(=O)OCC(O)CO[P]([O-])(=O)OCC[N+](C)(C)C	Lipids and lipid-like molecules	Glycerophospholipids	Glycerophosphocholines		0.82	3999221
POS_259	4.699	113.058	1,4-Cyclohexanedione	[M+H]+	C6H8O2	DCZFGQYXRKMVFG-UHFFFAOYSA-N	O=C1CCC(=O)CC1	Organic oxygen compounds	Organooxygen compounds	Carbonyl compounds		0.795	30744
POS_12834	6.26	617.249	1,7-Bis(4-hydroxyphenyl)-3-heptanyl 6-O-[(2S,3R,4R)-3,4-dihydroxy-4-(hydroxymethyl)tetrahydro-2-furanyl]-beta-D-glucopyranoside	[M+Na]+	C30H42O12	JLMGCBFIPZDHLZ-JKHMXVTDSA-N	OCC1(O)COC(OCC2OC(OC(CCCCC3=CC=C(O)C=C3)CCC4=CC=C(O)C=C4)C(O)C(O)C2O)C1O	Phenylpropanoids and polyketides	Diarylheptanoids	Linear diarylheptanoids		0.739	70848
POS_7652	8.2	427.201	1'(2'H)-Naphthalene]-7-carboxaldehyde, 3',4',4'a,5',6',7',8',8'a-octahydro-4,6',7'-trihydroxy-6-(hydroxymethyl)-2',5',5',8'a-tetramethyl-spiro[benzofuran-2(3H)	[M+Na]+	C23H32O6	NZIVCAVTGFEAJT-UHFFFAOYSA-N	CC1CCC2C(C)(C)C(O)C(O)CC2(C)C13CC4=C(O3)C(=C(CO)C=C4O)C=O	Organoheterocyclic compounds	Benzofurans			0.766	122286
POS_5725	4.391	365.114	10-Hydroxycamptothecin	[M+H]+	C20H16N2O5	HAWSQZCWOQZXHI-FQEVSTJZSA-N	CC[C@@]1(O)C(=O)OCC2=C1C=C3N(CC4=C3N=C5C=CC(=CC5=C4)O)C2=O	Alkaloids and derivatives	Camptothecins			0.775	439490
POS_790	4.688	153.123	10-Hydroxydecanoic acid	[M-2H2O+H]+	C10H20O3	YJCJVMMDTBEITC-UHFFFAOYSA-N	OCCCCCCCCCC(O)=O	Organic acids and derivatives	Hydroxy acids and derivatives	Medium-chain hydroxy acids and derivatives	C02774	0.732	71989
POS_3674	7.281	295.145	11-(Phenylcarbonyl)-7,11-diazatricyclo[7.3.1.0<2,7>]trideca-2,4-dien-6-one	[M+H]+	C18H18N2O2	HODDQHCNQOBZKP-UHFFFAOYSA-N	O=C1C=CC=C2C3CC(CN(C3)C(=O)C4=CC=CC=C4)CN12	Organoheterocyclic compounds	Piperidines	N-acylpiperidines		0.738	24326
POS_3519	8.112	289.174	12-Hydroxy-13-(hydroxymethyl)-3,5,7-trimethyl-2,4-tetradecadienedioic acid	[M-3H2O+H]+	C18H30O6	QFZISQBFEIXWDM-UTLPMFLDSA-N	CC(CCCCC(O)C(CO)C(O)=O)CC(C)=CC(C)=CC(O)=O	Lipids and lipid-like molecules	Fatty Acyls	Fatty acids and conjugates		0.738	525910
POS_1741	4.618	209.115	12-Hydroxyjasmonic acid	[M-H2O+H]+	C12H18O4	RZGFUGXQKMEMOO-BSANDHCLSA-N	OCC\\C=C/C[C@@H]1[C@H](CCC1=O)CC(O)=O	Lipids and lipid-like molecules	Fatty Acyls	Lineolic acids and derivatives		0.769	494488
POS_4846	11.156	337.269	12,19,20-Trihydroxy-14-methylenegeranylnerol	[M+H-H2O]+	C21H38O4	GNDMMQFAFXCKOZ-HQNHMHSFNA-N	OCC=C(CO)CCCC(CO)CCC=C(C)C(O)CC(=C)C(C)C					0.701	508150
POS_7735	13.675	429.368	13'-Hydroxy-alpha-tocopherol	[M+H-H2O]+	C29H50O3	URYLCCKXLNXSRS-XIRVVSDESA-N	OC=1C(=C(C=2OC(C)(CCC2C1C)CCCC(C)CCCC(C)CCCC(C)CO)C)C					0.763	30864928
POS_3635	11.084	293.245	14-(Hydroxymethyl)-5,9-dimethyltetracyclo[11.2.1.0~1,10~.0~4,9~]hexadecan-5-ol	[M+H]+	C19H32O2	LZAZGDZVFQSCFO-UHFFFAOYSA-N	CC1(O)CCCC2(C)C1CCC34CC(CO)C(CCC23)C4	Lipids and lipid-like molecules	Prenol lipids	Diterpenoids		0.817	143857
POS_2714	0.611	258.106	2-(((R)-2,3-Dihydroxypropyl)phosphoryloxy)-N,N,N-trimethylethanaminium	[M]+	[C8H21NO6P]+	SUHOQUVVVLNYQR-MRVPVSSYSA-O	C[N+](C)(C)CCO[P](O)(=O)OCC(O)CO	Lipids and lipid-like molecules	Glycerophospholipids	Glycerophosphocholines		0.767	44893
POS_1380	4.722	189.124	2-(1-Phenylethyl)-3,6-Dihydro-2H-Pyran	[M+H]+	C13H16O	YZZCODTUVAVDER-AAEUAGOBSA-N	O1CC=CCC1C(C=2C=CC=CC2)C					0.709	234458
POS_5068	10.788	343.218	2-[(2'R,8R,8aS)-2',4,4,7,8a-Pentamethylspiro[2,3,4a,5-tetrahydro-1H-naphthalene-8,5'-oxolane]-2'-yl]acetic acid	[M+Na]+	C20H32O3	XLWWERNKTLITEF-FOUFQHLJSA-N	CC1=CCC2C(C)(C)CCCC2(C)C13CCC(C)(CC(O)=O)O3	Lipids and lipid-like molecules	Prenol lipids	Diterpenoids		0.759	68412
POS_7109	4.182	411.156	2-[(2Z)-5-(Hexopyranosyloxy)-2-penten-1-yl]-3-oxo-, (1R,2R)-cyclopentaneacetic acid	[M+Na]+	C18H28O9	JFDNMLUPLXZXGV-YAYCWVCRSA-N	OCC1OC(OCC\\C=C/C[C@@H]2[C@H](CCC2=O)CC(O)=O)C(O)C(O)C1O	Lipids and lipid-like molecules	Fatty Acyls	Fatty acyl glycosides		0.787	253601
POS_9037	3.72	473.228	2-[2,3,8-Trihydroxy-8-(hydroxymethyl)-3-methyldecahydro-5-azulenyl]-2-propanyl beta-D-glucopyranoside	[M+Na]+	C21H38O10	ZQIOVWYOYSNXID-UHFFFAOYSA-N	CC(C)(OC1OC(CO)C(O)C(O)C1O)C2CCC(O)(CO)C3CC(O)C(C)(O)C3C2	Lipids and lipid-like molecules	Prenol lipids	Terpene glycosides		0.736	42032
POS_7179	12.593	413.259	2-Acetoxy-4-pentadecylbenzoic acid	[M+Na]+	C24H38O4	FMPIFABORGZGFA-UHFFFAOYSA-N	CCCCCCCCCCCCCCCC1=CC=C(C(O)=O)C(=C1)OC(C)=O	Benzenoids	Benzene and substituted derivatives	Benzoic acids and derivatives		0.806	17111090
POS_4300	9.142	318.295	2-Aminooctadecane-1,3,4-triol	[M+H]+	C18H39NO3	AERBNCYCJBRYDG-UHFFFAOYSA-N	CCCCCCCCCCCCCCC(O)C(O)C(N)CO	Organic nitrogen compounds	Organonitrogen compounds	Amines		0.755	171108
POS_781	3.289	153.052	2-Hydroxy-4-methoxybenzaldehyde	[M+H]+	C8H8O3	WZUODJNEIXSNEU-UHFFFAOYSA-N	COC1=CC(=C(C=C1)C=O)O					0.768	71656
POS_969	8.324	165.051	2-Hydroxycinnamic acid	[M+H]+	C9H8O3	PMOWTIHVNWZYFI-AATRIKPKSA-N	OC(=O)C=CC1=C(O)C=CC=C1	Phenylpropanoids and polyketides	Cinnamic acids and derivatives	Hydroxycinnamic acids and derivatives	C01772	0.79	94603
POS_3510	3.102	289.088	2-Methyl-3-[(2S,3R,4S,5S,6R)-3,4,5-trihydroxy-6-(hydroxymethyl)oxan-2-yl]oxypyran-4-one	[M+H]+	C12H16O8	YGSIRXHFAUFUEJ-GPTQDWHKSA-N	CC1=C(OC2OC(CO)C(O)C(O)C2O)C(=O)C=CO1	Organic oxygen compounds	Organooxygen compounds	Carbohydrates and carbohydrate conjugates		0.83	799473
POS_4671	12.076	331.28	2-Palmitoylglycerol	[M+H]+	C19H38O4	BBNYCLAREVXOSG-UHFFFAOYSA-N	CCCCCCCCCCCCCCCC(=O)OC(CO)CO	Lipids and lipid-like molecules	Glycerolipids	Monoradylglycerols		0.782	1923040
POS_3110	3.582	275.05	2-Phenyl-3H-benzimidazol-1-ium-5-sulfonate	[M+H]+	C13H10N2O3S	UVCJGUGAGLDPAA-UHFFFAOYSA-N	O[S](=O)(=O)C1=CC2=C(C=C1)N=C([NH]2)C3=CC=CC=C3	Organoheterocyclic compounds	Benzimidazoles	Phenylbenzimidazoles		0.746	1479368
POS_8370	5.852	451.149	2-Phenylethyl 3-O-(4-carboxy-3-hydroxy-3-methylbutanoyl)-beta-D-glucopyranoside	[M+Na]+	C20H28O10	WGMNBGJQXOIVGA-HJVQXQJGSA-N	CC(O)(CC(O)=O)CC(=O)OC1C(O)C(CO)OC(OCCC2=CC=CC=C2)C1O	Lipids and lipid-like molecules	Saccharolipids			0.719	684644
POS_6627	5.852	395.195	2,3-Dimethoxystrychnidin-10-one	[M+H]+	C23H26N2O4	RRKTZKIUPZVBMF-PLNGPGDESA-N	COC1=C(OC)C=C2C(=C1)N3C4[C@@H]5C(CC3=O)OCC=C6CN7CC[C@]24[C@@H]7C[C@H]56	Alkaloids and derivatives	Strychnos alkaloids			0.756	513114
POS_4181	14.264	313.269	2,4-Dihydroxyheptadecyl acetate	[M-H2O+H]+	C19H38O4	ZBVKFVTUHVIICH-UHFFFAOYSA-N	CCCCCCCCCCCCCC(O)CC(O)COC(C)=O	Lipids and lipid-like molecules	Fatty Acyls	Fatty alcohols		0.775	3037433
POS_1244	4.413	181.082	3-(3-Methoxyphenyl)propionic acid	[M+NH4]+	C10H12O3	BJJQJLOZWBZEGA-UHFFFAOYSA-N	COC1=CC=CC(=C1)CCC(O)=O	Phenylpropanoids and polyketides	Phenylpropanoic acids			0.804	4844213
POS_6182	3.997	381.111	3-[2-Methoxy-3-[(2S,3R,4S,5S,6R)-3,4,5-trihydroxy-6-(hydroxymethyl)oxan-2-yl]oxyphenyl]propanoic acid	[M+Na]+	C16H22O9	VLHQGQCFFBCKMV-RSQMQNDGSA-N	COC1=C(CCC(O)=O)C=CC=C1O[C@@H]2O[C@H](CO)[C@@H](O)[C@H](O)[C@H]2O	Organic oxygen compounds	Organooxygen compounds	Carbohydrates and carbohydrate conjugates		0.832	630960
POS_2978	7.679	269.169	3-[4-Methyl-1-(2-methylpropanoyl)-3-oxocyclohexyl]butanoic acid	[M+H]+	C15H24O4	ZIOCYJNRYIRTQD-UHFFFAOYSA-N	CC(C)C(=O)C1(CCC(C)C(=O)C1)C(C)CC(O)=O	Lipids and lipid-like molecules	Prenol lipids	Monoterpenoids		0.719	93148
POS_11801	14.264	573.477	3-{7-[5-(1-hydroxyhenicosa-4,8-dien-1-yl)oxolan-2-yl]heptyl}-5-methyl-5H-furan-2-one	[M+H]+	C37H64O4	FGFWSFXBCSXBEY-MLPZMSAMNA-N	O=C1OC(C=C1CCCCCCCC2OC(CC2)C(O)CCC=CCCC=CCCCCCCCCCCCC)C					0.81	3037950
POS_203	7.999	105.067	3-Cyanopyridine	[M+H]+	C6H4N2	GZPHSAQLYPIAIN-UHFFFAOYSA-N	N#CC1=CN=CC=C1	Organoheterocyclic compounds	Pyridines and derivatives	3-pyridinecarbonitriles		0.735	217083
POS_10782	13.086	535.26	3-Deoxo-3-beta-Acetoxydeoxydihydrogedunin	[M+Na]+	C30H40O7	HNFPPWVGLWDXQQ-UDYWQXAESA-N	CC(=O)OC1CCC2(C)C3CCC4(C)C(OC(=O)C=C4C3(C)C(CC2C1(C)C)OC(C)=O)C5=COC=C5	Organoheterocyclic compounds	Naphthopyrans			0.744	1058058
POS_8753	5.947	463.209	3-Ethyl-4-hydroxy-4-methylpentyl 6-O-[(2S,3R,4R)-tetrahydro-3,4-dihydroxy-4-(hydroxymethyl)-2-furanyl]-beta-D-glucopyranoside	[M+Na]+	C19H36O11	ZHOUHFMRWBOCFO-RPIGWSNLSA-N	CCC(CCO[C@@H]1O[C@H](CO[C@H]2OC[C@](O)(CO)[C@H]2O)[C@@H](O)[C@H](O)[C@H]1O)C(C)(C)O	Lipids and lipid-like molecules	Fatty Acyls	Fatty acyl glycosides		0.78	289569
POS_11495	5.026	561.186	3-Hydroxy-1-(3-hydroxy-4-methoxyphenyl)-2-{4-[(1E)-3-hydroxy-1-propen-1-yl]-2-methoxyphenoxy}propyl beta-D-glucopyranoside	[M+Na]+	C26H34O12	XBTCTDQFKYYTLT-JPNAWLBCSA-N	COC1=CC=C(C=C1O)C(O[C@@H]2O[C@H](CO)[C@@H](O)[C@H](O)[C@H]2O)C(CO)OC3=C(OC)C=C(\\C=C\\CO)C=C3	Organic oxygen compounds	Organooxygen compounds	Carbohydrates and carbohydrate conjugates		0.79	199902
POS_6308	5.142	385.141	3-Hydroxy-2-[3-methyl-2-[[3,4,5-trihydroxy-6-(hydroxymethyl)oxan-2-yl]oxymethyl]cyclopent-2-en-1-yl]propanoic acid	[M+Na]+	C16H26O9	IVUFRBWVXKXZMM-UHFFFAOYSA-N	CC1=C(COC2OC(CO)C(O)C(O)C2O)C(CC1)C(CO)C(O)=O	Lipids and lipid-like molecules	Prenol lipids	Terpene glycosides		0.792	3301621
POS_978	4.032	165.053	3-Hydroxycinnamic acid	[M+H]+	C9H8O3	KKSDGJDHHZEWEP-SNAWJCMRSA-N	OC(=O)C=CC1=CC(=CC=C1)O	Phenylpropanoids and polyketides	Cinnamic acids and derivatives	Hydroxycinnamic acids and derivatives	C12621	0.879	114434
POS_1733	5.072	209.076	3,5-Dimethoxycinnamic acid	[M+H]+	C11H12O4	VLSRUFWCGBMYDJ-ONEGZZNKSA-N	COC1=CC(=CC(=C1)C=CC(O)=O)OC	Phenylpropanoids and polyketides	Cinnamic acids and derivatives	Hydroxycinnamic acids and derivatives		0.759	96216
POS_2265	6.761	237.18	3,7-Epoxycaryophyllan-6-One	[M+H]+	C15H24O2	PPGUUDJMTMGALC-UHFFFAOYSA-N	CC1(C)CC2C1CCC3(C)OC2(C)CCC3=O	Organoheterocyclic compounds	Oxepanes			0.743	195211
POS_1910	6.344	219.169	3,8-Dimethyl-5-propan-2-yl-4a,5,6,8a-tetrahydro-1H-naphthalen-2-one	[M+H]+	C15H22O	LMILVXQXGKTFSZ-UHFFFAOYSA-N	CC(C)C1CC=C(C)C2CC(=O)C(=CC12)C	Lipids and lipid-like molecules	Prenol lipids	Sesquiterpenoids		0.803	300280
POS_5371	2.791	353.117	4-(2-Hydroxyethyl)-2-methoxyphenyl-beta-D-glucopyranoside	[M+Na]+	C15H22O8	ZZDVZVBAZHPHLY-UXXRCYHCSA-N	COC1=C(O[C@@H]2O[C@H](CO)[C@@H](O)[C@H](O)[C@H]2O)C=CC(=C1)CCO	Organic oxygen compounds	Organooxygen compounds	Carbohydrates and carbohydrate conjugates		0.826	1458474
POS_12824	5.236	617.141	4-(3,4-Dihydroxyphenyl)-5-[(6-O-beta-D-xylopyranosyl-beta-D-glucopyranosyl)oxy]-7-methoxycoumarin	[M+Na]+	C27H30O15	GXDJGKMWLJOJFR-WUSKNVGPSA-N	COC1=CC(=C2C(=C1)OC(=O)C=C2C3=CC(=C(O)C=C3)O)OC4OC(COC5OCC(O)C(O)C5O)C(O)C(O)C4O	Phenylpropanoids and polyketides	Coumarins and derivatives	Coumarin glycosides		0.766	1160532
POS_10510	5.552	525.222	4-[(E)-3-[(2R,3R,4S,5S,6R)-3-[(2S,3R,4R)-3,4-Dihydroxy-4-(hydroxymethyl)oxolan-2-yl]oxy-4,5-dihydroxy-6-(hydroxymethyl)oxan-2-yl]oxybut-1-enyl]-3,5,5-trimethylcyclohex-2-en-1-one	[M+Na]+	C24H38O11	IDPRQTHSAHGSDW-BTOUMFIXSA-N	CC(OC1OC(CO)C(O)C(O)C1OC2OCC(O)(CO)C2O)C=CC3C(=CC(=O)CC3(C)C)C	Lipids and lipid-like molecules	Fatty Acyls	Fatty acyl glycosides		0.735	145052
POS_8808	11.467	465.275	4-[3-Methyl-5-(5,6,7-trihydroxy-1,2,4a,5-tetramethyl-3,4,6,7,8,8a-hexahydro-2H-naphthalen-1-yl)pentoxy]-4-oxobutanoic acid	[M+Na]+	C24H42O7	DQOOFQPFNNGTHL-UHFFFAOYSA-N	CC(CCOC(=O)CCC(O)=O)CCC1(C)C(C)CCC2(C)C1CC(O)C(O)C2(C)O	Lipids and lipid-like molecules	Prenol lipids	Diterpenoids		0.724	837139
POS_7042	4.699	409.178	4-[4-(beta-D-Glucopyranosyloxy)-2-hydroxy-2,6,6-trimethylcyclohexylidene]-3-buten-2-one	[M+Na]+	C19H30O8	OSUSRWMGHUUXBY-OHWUEDFNSA-N	CC(=O)[CH]=[C]=[C]1C(C)(C)CC(CC1(C)O)O[C@@H]2O[C@H](CO)[C@@H](O)[C@H](O)[C@H]2O	Lipids and lipid-like molecules	Prenol lipids	Terpene glycosides		0.818	4674188
POS_3882	3.605	303.136	4-[Formyl(6-methoxyquinolin-8-yl)amino]pentanoic acid	[M+H]+	C16H18N2O4	HWLCTPIUUFQVEK-UHFFFAOYSA-N	COC1=CC2=CC=CN=C2C(=C1)N(C=O)C(C)CCC(O)=O	Organoheterocyclic compounds	Quinolines and derivatives			0.803	50749
POS_5299	3.445	351.099	4-Acetyl-3-hydroxy-5-methylphenyl beta-D-glucopyranoside	[M+Na]+	C15H20O8	CFJLERBDXYGARW-TVKJYDDYSA-N	CC(=O)C1=C(O)C=C(OC2OC(CO)C(O)C(O)C2O)C=C1C	Organic oxygen compounds	Organooxygen compounds	Carbohydrates and carbohydrate conjugates		0.768	2180370
POS_442	0.845	130.095	4-Azaniumylhex-5-enoate	[M+H]+	C6H11NO2	PJDFLNIOAUIZSL-UHFFFAOYSA-N	NC(CCC(O)=O)C=C	Organic acids and derivatives	Carboxylic acids and derivatives	Amino acids, peptides, and analogues		0.779	555133
POS_668	0.746	146.089	4-Guanidinobutyric acid	[M+H]+	C5H11N3O2	TUHVEAJXIMEOSA-UHFFFAOYSA-N	NC(=N)NCCCC(O)=O	Organic acids and derivatives	Carboxylic acids and derivatives	Amino acids, peptides, and analogues	C01035	0.93	803880
POS_1190	5.876	179.065	4-Hydroxy-3-methoxycinnamaldehyde	[M+H]+	C10H10O3	DKZBBWMURDFHNE-NSCUHMNNSA-N	COC1=CC(=CC=C1O)C=CC=O	Benzenoids	Phenols	Methoxyphenols	C02666	0.727	96523
POS_8032	6.613	439.157	4-Hydroxy-7-methyl-2-[2-[3,4,5-trihydroxy-6-(hydroxymethyl)oxan-2-yl]oxypropan-2-yl]-2,3-dihydrofuro[3,2-g]chromen-5-one	[M+H]+	C21H26O10	KHWKLNXMSVVKCH-UHFFFAOYSA-N	CC1=CC(=O)C2=C(O1)C=C3OC(CC3=C2O)C(C)(C)OC4OC(CO)C(O)C(O)C4O	Organoheterocyclic compounds	Benzopyrans	1-benzopyrans		0.786	276672
POS_970	12.185	165.051	4-Hydroxycinnamic acid	[M+H]+	C9H8O3	NGSWKAQJJWESNS-ZZXKWVIFSA-N	OC(=O)C=CC1=CC=C(O)C=C1	Phenylpropanoids and polyketides	Cinnamic acids and derivatives	Hydroxycinnamic acids and derivatives	C00811	0.733	67535
POS_1192	6.405	179.067	4-Methoxycinnamic acid	[M+H]+	C10H10O3	AFDXODALSZRGIH-QPJJXVBHSA-N	COC1=CC=C(C=CC(O)=O)C=C1	Phenylpropanoids and polyketides	Cinnamic acids and derivatives	Cinnamic acids		0.719	261344
POS_628	3.778	144.044	4-Methyl-5-thiazoleethanol	[M+H]+	C6H9NOS	BKAWJIRCKVUVED-UHFFFAOYSA-N	CC1=C(CCO)SC=N1	Organoheterocyclic compounds	Azoles	Thiazoles	C04294	0.81	25769
POS_1429	4.478	193.045	4-Methylesculetin	[M+H]+	C10H8O4	KVOJTUXGYQVLAJ-UHFFFAOYSA-N	CC1=CC(=O)OC2=C1C=C(O)C(=C2)O	Phenylpropanoids and polyketides	Coumarins and derivatives	Hydroxycoumarins		0.791	263822
POS_5832	4.159	369.113	4-O-Feruloyl-D-quinic acid	[M+H]+	C17H20O9	VTMFDSJJVNQXLT-KSQYBWRXSA-N	COC1=CC(=CC=C1O)\\C=C\\C(=O)O[C@H]2[C@H](O)C[C@@](O)(C[C@H]2O)C(O)=O	Organic oxygen compounds	Organooxygen compounds	Alcohols and polyols		0.758	85613
POS_10521	8.124	525.289	4,4,8,10,14-Pentamethyl-17-(4,5,6-trihydroxy-6-methylheptan-2-yl)-2,5,6,7,9,15-hexahydro-1H-cyclopenta[a]phenanthrene-3,16-dione	[M+K]+	C30H46O5	PGQUPZCFLHXEHV-UHFFFAOYSA-N	CC(CC(O)C(O)C(C)(C)O)C1=C2C=CC3C4(C)CCC(=O)C(C)(C)C4CCC3(C)C2(C)CC1=O	Lipids and lipid-like molecules	Prenol lipids	Triterpenoids		0.724	81371
POS_6579	11.331	393.273	4,9,13-trimethyl-15-(2,6,6-trimethylcyclohex-1-en-1-yl)pentadeca-2,4,6,8,10,12,14-heptaenoic acid	[M+H]+	C27H36O2	VIAXZJZCXWZOOV-KSMLSKHQSA-N	O=C(O)C=CC(=CC=CC=C(C=CC=C(C=CC1=C(C)CCCC1(C)C)C)C)C					0.726	246122
POS_8368	1.206	451.134	4'-Methoxyflavone	[2M-3H2O+H]+	C16H12O3	OMICQBVLCVRFGN-UHFFFAOYSA-N	COC1=CC=C(C=C1)C2=CC(=O)C3=C(O2)C=CC=C3	Phenylpropanoids and polyketides	Flavonoids	O-methylated flavonoids		0.761	34196
POS_5322	9.952	351.247	5-(5-Methoxycarbonyl-5,8a-dimethyl-2-methylidene-3,4,4a,6,7,8-hexahydro-1H-naphthalen-1-yl)-3-methylpentanoic acid	[M+H]+	C21H34O4	WTDIRAZPDUAJEB-UHFFFAOYSA-N	COC(=O)C1(C)CCCC2(C)C(CCC(C)CC(O)=O)C(=C)CCC12	Lipids and lipid-like molecules	Prenol lipids	Diterpenoids		0.736	523378
POS_1473	7.976	195.133	5-(6-Methyl-6-hydroxyheptyl)furan-2(5H)-one	[M-H2O+H]+	C12H20O3	RFEPDQFPTNCOBK-UHFFFAOYSA-N	CC(C)(O)CCCCCC1OC(=O)C=C1	Organoheterocyclic compounds	Dihydrofurans	Furanones		0.718	640041
POS_1744	5.505	209.149	5-(6-Methyl-6-hydroxyoctyl)furan-2(5H)-one	[M-H2O+H]+	C13H22O3	SYVFGLXUEAXFAP-UHFFFAOYSA-N	CCC(C)(O)CCCCCC1OC(=O)C=C1	Organoheterocyclic compounds	Dihydrofurans	Furanones		0.725	373987
POS_2037	5.636	225.144	5-(6-Methyl-7-oxooctyl)furan-2(5H)-one	[M+H]+	C13H20O3	MSOHKYKACHEERC-UHFFFAOYSA-N	CC(CCCCCC1OC(=O)C=C1)C(C)=O	Organoheterocyclic compounds	Dihydrofurans	Furanones		0.742	125324
POS_2851	11.652	263.232	5-dodecyl-4-hydroxy-4-methylcyclopent-2-en-1-one	[M+H-H2O]+	C18H32O2	HWMQXCKSSOGAEL-PWQNQZOANA-N	O=C1C=CC(O)(C)C1CCCCCCCCCCCC					0.776	7244312
POS_2744	7.306	259.093	5-Hydroxy-2,8-dimethyl-6,9-dihydropyrano[3,2-h][1]benzoxepin-4-one	[M+H]+	C15H14O4	IUIHYYSAVUBPQO-UHFFFAOYSA-N	CC1=CCC2=C(O)C3=C(OC(=CC3=O)C)C=C2OC1	Organoheterocyclic compounds	Benzoxepines			0.762	51741
POS_8651	4.298	459.177	5-Hydroxy-7-[4-hydroxy-2-methoxy-3-(3-methylbut-2-enyl)phenyl]-2,2-dimethyl-7,8-dihydropyrano[3,2-g]chromen-6-one	[M+Na]+	C26H28O6	QJFJALJGKXGWFO-UHFFFAOYSA-N	COC1=C(C=CC(=C1CC=C(C)C)O)C2COC3=CC4=C(C=CC(C)(C)O4)C(=C3C2=O)O	Phenylpropanoids and polyketides	Isoflavonoids	Isoflavans		0.739	168498
POS_1909	8.05	219.169	5-hydroxyculmorin	[M-2H2O+H]+	C15H26O3	XFKGEQRMYJCXFK-YTAGIEBCSA-N	CC1(C)[C@H](O)CC[C@]2(C)[C@H]3[C@H](O)C[C@]2(C)C(O)[C@@H]13	Lipids and lipid-like molecules	Prenol lipids	Monoterpenoids		0.829	349687
POS_8511	3.3	455.147	5‐(1‐benzofuran‐2‐yl)‐N,N‐dimethyl‐2‐[4‐(piperazin‐1‐yl)phenyl]‐1,3‐thiazole‐4‐carboxamide	[M+Na]+	C24H24N4O2S	UMTLULRIWDACNW-UHFFFAOYSA-N	CN(C)C(=O)C1=C(SC(=N1)C2=CC=C(C=C2)N3CCNCC3)C4=CC5=C(O4)C=CC=C5	Organoheterocyclic compounds	Diazinanes	Piperazines		0.818	169163
POS_2651	13.79	255.206	5|A-Androst-1-ene-3|A,17|A-diol	[M-2H2O+H]+	C19H30O2	RZFGPAMUAXASRE-KHOSGYARSA-N	C[C@]12CC[C@H]3[C@@H](CC[C@H]4C[C@H](O)C=C[C@]34C)[C@@H]1CC[C@@H]2O	Lipids and lipid-like molecules	Steroids and steroid derivatives	Androstane steroids		0.779	337378
POS_9592	6.127	493.16	6-[2-Hydroxy-3-methyl-3-[(2S,3R,4S,5S,6R)-3,4,5-trihydroxy-6-(hydroxymethyl)oxan-2-yl]oxybutyl]-5,7-dimethoxychromen-2-one	[M+Na]+	C22H30O11	YVMUBJPWZKUGBC-NUTNSJPXSA-N	COC1=C(CC(O)C(C)(C)OC2OC(CO)C(O)C(O)C2O)C(=C3C=CC(=O)OC3=C1)OC	Lipids and lipid-like molecules	Fatty Acyls	Fatty acyl glycosides		0.701	216230
POS_6709	13.994	397.375	6-{9a,11a-dimethyl-1H,2H,3H,3aH,3bH,4H,8H,9H,9bH,10H,11H-cyclopenta[a]phenanthren-1-yl}-3-ethyl-2-methylheptane	[M+H]+	C29H48	ICCTZARHLGPHMT-AVTHQIONNA-N	C1=CCCC2(C1=CCC3C2CCC4(C)C(CCC34)C(C)CCC(CC)C(C)C)C					0.746	2755036
POS_17597	7.999	979.473	6-Deoxy-alpha-L-mannopyranosyl-(1->4)-beta-D-glucopyranosyl-(1->6)-1-O-[(3beta)-3,23-dihydroxy-23,28-dioxoolean-12-en-28-yl]-beta-D-glucopyranose	[M+Na]+	C48H76O19	LEXLFIULVWKBPT-FXLGSDSZSA-N	CC1OC(OC2C(O)C(O)C(OCC3OC(OC(=O)C45CCC(C)(C)CC4C6=CCC7C8(C)CCC(O)C(C)(C8CCC7(C)C6(C)CC5)C(O)=O)C(O)C(O)C3O)OC2CO)C(O)C(O)C1O	Lipids and lipid-like molecules	Prenol lipids	Terpene glycosides		0.721	126809
POS_10348	5.852	519.195	6,13-dihydroxy-2-[(E)-3-hydroxyhex-4-enoyl]-4,7,11,14-tetramethyl-16-[(1E,3E)-penta-1,3-dienyl]-5,12,15-trioxahexacyclo[7.5.2.03,7.04,13.06,11.010,14]hexadeca-1,9(16)-dien-8-one	[M+Na]+	C28H32O8	ATAIRWBABKGUFL-HVHNYWLFSA-N	C\\C=C\\C=C\\C1=C2C3C4(C)OC5(O)C6(C)OC4(O)C(C)(C6C(=C(O1)C35C)C(=O)CC(O)\\C=C\\C)C2=O	Organoheterocyclic compounds	Furopyrans			0.769	135911
POS_6962	4.379	407.091	6,7-Dimethoxy-8-(beta-D-glucopyranosyloxy)-2H-1-benzopyran-2-one	[M+Na]+	C17H20O10	MLOMRDQPPYHSAX-QSDFBURQSA-N	COC1=CC2=C(OC(=O)C=C2)C(=C1OC)OC3OC(CO)C(O)C(O)C3O	Phenylpropanoids and polyketides	Coumarins and derivatives	Coumarin glycosides		0.732	363650
POS_7246	6.127	415.222	7-Hydroxymitragynine	[M+H]+	C23H30N2O5	RYENLSMHLCNXJT-ZHOKILCHSA-N	CC[C@H]1CN2CC[C@@]3(O)C(=NC4=C3C(=CC=C4)OC)[C@@H]2C[C@@H]1\\C(=C/OC)C(=O)OC	Alkaloids and derivatives	Corynanthean-type alkaloids			0.773	96716
POS_1149	4.445	177.05	7-Methoxycoumarin	[M+H]+	C10H8O3	LIIALPBMIOVAHH-UHFFFAOYSA-N	COC1=CC2=C(C=CC(=O)O2)C=C1	Phenylpropanoids and polyketides	Coumarins and derivatives		C09268	0.738	207997
POS_6041	7.89	376.252	7''-ethyl-6-methyl-4'',7''-dihydro-3''H-dispiro[oxane-2,6'-[7,9,12]triazatricyclo[6.3.1.04,12]dodecane-10',2''-oxepin]-8'-en-3-ol	[M+H]+	C21H33N3O3	PVERDUFTDYLFAY-WXWVCVOLNA-N	OC1CCC(OC21NC3=NC4(OC(C=CCC4)CC)CC5N3C(CC5)C2)C					0.82	721186
POS_3627	9.117	293.207	8-[3-Oxo-2-[(E)-pent-2-enyl]cyclopenten-1-yl]octanoic acid	[M+H]+	C18H28O3	RHVWQVSLVMXMBR-XVNBXDOJSA-N	CCC=CCC1=C(CCCCCCCC(O)=O)CCC1=O	Lipids and lipid-like molecules	Fatty Acyls	Fatty acids and conjugates		0.839	987841
POS_2800	14.264	261.216	8-Hydroxy-9,10-epoxystearic acid	[M-3H2O+H]+	C18H34O4	GQEOLYBERRZZCE-UHFFFAOYSA-N	CCCCCCCCC1OC1C(O)CCCCCCC(O)=O	Lipids and lipid-like molecules	Fatty Acyls	Lineolic acids and derivatives		0.828	575945
POS_1045	3.801	169.072	9H-Pyrido[3,4-B]indole	[M+H]+	C11H8N2	AIFRHYZBTHREPW-UHFFFAOYSA-N	[NH]1C2=C(C=CC=C2)C3=C1C=NC=C3	Organoheterocyclic compounds	Indoles and derivatives	Pyridoindoles	C20157	0.704	41986
POS_3132	8.833	275.194	9s,13r-12-Oxophytodienoic Acid	[M-H2O+H]+	C18H28O3	PMTMAFAPLCGXGK-TTXFDSJOSA-N	CC\\C=C/C[C@@H]1[C@@H](CCCCCCCC(O)=O)C=CC1=O	Lipids and lipid-like molecules	Fatty Acyls	Eicosanoids		0.711	297283
POS_9900	4.851	503.146	Albiflorin	[M+Na]+	C23H28O11	QQUHMASGPODSIW-ICECTASOSA-N	C[C@]12C[C@@H](O)[C@@H]3C[C@@]1(O[C@@H]4O[C@H](CO)[C@@H](O)[C@H](O)[C@H]4O)[C@]3(COC(=O)C5=CC=CC=C5)C(=O)O2	Lipids and lipid-like molecules	Prenol lipids	Terpene glycosides		0.763	166706
POS_3062	2.112	273.089	alpha-Naphthoflavone	[M+H]+	C19H12O2	VFMMPHCGEFXGIP-UHFFFAOYSA-N	O=C1C=C(OC2=C1C=CC3=CC=CC=C23)C4=CC=CC=C4	Phenylpropanoids and polyketides	Flavonoids	Flavones		0.77	231034
POS_6646	13.79	395.36	alpha-Spinasterol	[M+H-H2O]+		JZVFJDZBLUFKCA-FXIAWGAOSA-N	CC[C@H](\\C=C\\[C@@H](C)[C@H]1CC[C@H]2C3=CC[C@H]4C[C@@H](O)CC[C@]4(C)[C@H]3CC[C@]12C)C(C)C	Lipids and lipid-like molecules	Steroids and steroid derivatives	Stigmastanes and derivatives		0.836	2621019
POS_14790	9.478	717.355	Amatain	[M+H]+	C43H48N4O6	RZBFPDQKWUWUCK-UHFFFAOYNA-N	COC(=O)C1=C2NC3=CC=CC=C3C24CCN5C6OC78C9CC%10%11CCOC%10CCN%12CCC7(C%11%12)C%13=C(N8CC6(C9)C%14OCCC%14(C1)C45)C(=CC=C%13)OC	Alkaloids and derivatives	Aspidospermatan-type alkaloids			0.743	90911
POS_5385	7.976	353.225	Anileridine	[M+H]+	C22H28N2O2	LKYQLAWMNBFNJT-UHFFFAOYSA-N	CCOC(=O)C1(CCN(CCC2=CC=C(N)C=C2)CC1)C3=CC=CC=C3	Organoheterocyclic compounds	Piperidines	Phenylpiperidines		0.835	7090764
POS_544	5.433	137.058	Anisic aldehyde	[M+H]+	C8H8O2	ZRSNZINYAWTAHE-UHFFFAOYSA-N	COC1=CC=C(C=C1)C=O					0.774	575521
POS_1128	0.735	175.115	Arginine	[M+H]+	C6H14N4O2	ODKSFYDXXFIFQN-UHFFFAOYSA-N	NC(CCCN=C(N)N)C(O)=O	Organic acids and derivatives	Carboxylic acids and derivatives	Amino acids, peptides, and analogues		0.863	298098
POS_2223	6.271	235.165	Artemisinic acid	[M+H]+	C15H22O2	PLQMEXSCSAIXGB-SAXRGWBVSA-N	C[C@@H]1CC[C@H]([C@@H]2[C@H]1CCC(=C2)C)C(=C)C(=O)O					0.793	741741
POS_1234	7.741	181.044	Aspirin	[M+H]+	C9H8O4	BSYNRYMUTXBXSQ-UHFFFAOYSA-N	CC(=O)OC1=C(C=CC=C1)C(O)=O	Benzenoids	Benzene and substituted derivatives	Benzoic acids and derivatives	C01405	0.753	33110
POS_8160	4.524	443.145	Asteltoxin C	[M+K]+	C22H28O7	DTHZYTRJZMDQLM-QWMBVKPUSA-N	COC1=CC(=O)OC(=C1C)\\C=C\\C=C\\C=C\\[C@H]2O[C@H]3O[C@H](C)[C@](C)(O)[C@@]3(C)[C@H]2O	Organoheterocyclic compounds	Furofurans			0.796	27606
POS_2521	8.149	249.146	Atractylenolide III	[M+H]+	C15H20O3	FBMORZZOJSDNRQ-GLQYFDAESA-N	CC1=C2CC3C(=C)CCCC3(C)CC2(O)OC1=O	Lipids and lipid-like molecules	Prenol lipids	Terpene lactones		0.708	61096
POS_4106	11.132	311.253	Avocadene 2-acetate	[M-H2O+H]+	C19H36O4	LUIGTZGBXWZJAX-UHFFFAOYSA-N	CC(=O)OC(CO)CC(O)CCCCCCCCCCCC=C	Lipids and lipid-like molecules	Fatty Acyls	Fatty alcohols		0.724	193469
POS_15190	5.376	743.24	Azadirachtin	[M+Na]+	C35H44O16	FTNJWQUOZFUQQJ-NDAWSKJSSA-N	COC(=O)C1(O)OCC23C(CC(OC(C)=O)C4(COC(C(O)C(C)(C12)C56OC5(C)C7CC6OC8OC=CC78O)C34)C(=O)OC)OC(=O)C(C)=CC	Lipids and lipid-like molecules	Prenol lipids	Triterpenoids	C08748	0.716	25987
POS_216	9.353	107.047	Benzaldehyde	[M+H]+	C7H6O	HUMNYLRZRPPJDN-UHFFFAOYSA-N	O=CC1=CC=CC=C1	Benzenoids	Benzene and substituted derivatives	Benzoyl derivatives	C00261	0.805	18810
POS_1007	3.755	166.084	Benzocaine	[M+H]+	C9H11NO2	BLFLLBZGZJTVJG-UHFFFAOYSA-N	CCOC(=O)C1=CC=C(N)C=C1	Benzenoids	Benzene and substituted derivatives	Benzoic acids and derivatives	C07527	0.72	73592
POS_1718	2.791	208.13	Benzoylcholine	[M]+	[C12H18NO2]+	HOPVGFKDVOOCHD-UHFFFAOYSA-N	C[N+](C)(C)CCOC(=O)C1=CC=CC=C1	Benzenoids	Benzene and substituted derivatives	Benzoic acids and derivatives		0.713	25909
POS_1864	6.92	217.047	Bergapten	[M+H]+	C12H8O4	BGEBZHIAGXMEMV-UHFFFAOYSA-N	COC1=C2C=COC2=CC3=C1C=CC(=O)O3	Phenylpropanoids and polyketides	Coumarins and derivatives	Furanocoumarins	C01557	0.916	593945
POS_294	14.788	118.083	Betaine	[M+H]+	C5H11NO2	KWIUHFFTVRNATP-UHFFFAOYSA-N	C[N+](C)(C)CC([O-])=O	Organic acids and derivatives	Carboxylic acids and derivatives	Amino acids, peptides, and analogues		0.908	683438
POS_10739	12.791	533.407	Biochanin A 7-O-beta-d-glucoside-6''-O-malonate	[M+H]+	C25H24O13	VRCBYTZZZFFKEN-RBZNUJCTSA-N	COC1=CC=C(C=C1)C2=COC3=CC(=CC(=C3C2=O)O)OC4OC(COC(=O)CC(O)=O)C(O)C(O)C4O	Phenylpropanoids and polyketides	Isoflavonoids	Isoflavonoid O-glycosides	C12625	0.817	347224
POS_7837	6.417	433.139	Bruceine D	[M+Na]+		JBDMZGKDLMGOFR-DFEKUIMESA-N	CC1=CC(=O)[C@@H](O)[C@@]2(C)[C@H]1C[C@H]3OC(=O)[C@H](O)[C@@]4(O)[C@@]5(C)OC[C@]34[C@@H]2[C@@H](O)[C@@H]5O	Lipids and lipid-like molecules	Prenol lipids	Terpene lactones		0.743	413799
POS_6631	5.744	395.198	Brucine	[M+H]+	C23H26N2O4	RRKTZKIUPZVBMF-UHFFFAOYSA-N	COC1=C(OC)C=C2C(=C1)N3C4C5C(CC3=O)OCC=C6CN7CCC24C7CC56	Alkaloids and derivatives	Strychnos alkaloids			0.754	125049
POS_5101	11.096	344.251	Bullatine A	[M+H]+	C22H33NO2	OVXLNQAYPUEDSI-LVIQKLEBSA-N	CCN1C[C@@]2(CCCC34[C@@H]2CC(C31)C56[C@@H]4[C@H](C(CC5)C(=C)[C@H]6O)O)C					0.738	126120
POS_4261	9.328	317.166	Bupirimate	[M+H]+	C13H24N4O3S	DSKJPMWIHSOYEA-UHFFFAOYSA-N	CCCCC1=C(C)N=C(NCC)N=C1O[S](=O)(=O)N(C)C	Organoheterocyclic compounds	Diazines	Pyrimidines and pyrimidine derivatives		0.81	145363
POS_4269	10.253	317.204	Cafestol	[M+H]+	C20H28O3	DNJVYWXIDISQRD-HWUKTEKMSA-N	C[C@@]12CCC3=C(C=CO3)[C@H]1CC[C@@]45C[C@@H](CC[C@@H]24)[C@@](O)(CO)C5	Organoheterocyclic compounds	Naphthofurans			0.771	1831090
POS_1466	4.125	195.084	Caffeine	[M+H]+	C8H10N4O2	RYYVLZVUVIJVGH-UHFFFAOYSA-N	C[N]1C=NC2=C1C(=O)N(C)C(=O)N2C	Organoheterocyclic compounds	Imidazopyrimidines	Purines and purine derivatives	C07481	0.848	124917
POS_6278	13.802	383.361	Campesterol	[M+H-H2O]+	C28H48O	SGNBVLSWZMBQTH-PODYLUTMSA-N	CC(C)[C@H](C)CC[C@@H](C)[C@H]1CC[C@H]2[C@@H]3CC=C4C[C@@H](O)CC[C@]4(C)[C@H]3CC[C@]12C	Lipids and lipid-like molecules	Steroids and steroid derivatives	Ergostane steroids		0.756	501747
POS_5239	6.15	349.119	Camptothecin	[M+H]+	C20H16N2O4	VSJKWCGYPAHWDS-FQEVSTJZSA-N	CCC1(O)C(=O)OCC2=C1C=C3N(CC4=C3N=C5C=CC=CC5=C4)C2=O	Alkaloids and derivatives	Camptothecins			0.739	282422
POS_10631	8.149	529.269	Chaetoglobosin C	[M+H]+	C32H36N2O5	RIZAHVBYKWUPHQ-MASOQXDXSA-N	C[C@H]\\1C\\C=C/[C@H]2[C@@H]3O[C@]3(C)[C@@H](C)[C@H]4[C@H](CC5=C[NH]C6=CC=CC=C56)NC(=O)[C@@]24C(=O)CCC(=O)C(=O)\\C(=C1)C	Alkaloids and derivatives	Cytochalasans	Chaetoglobosins		0.701	49527
POS_15015	2.982	731.198	Chaetoxanthone B	[2M+Na]+	C20H18O6	ZUEKQPJBVORAFH-UHFFFAOYSA-N	COC1=C2C(=O)C3=C(OC2=CC=C1)C=C4OC5(C)CCCC(O5)C4=C3O	Organoheterocyclic compounds	Benzopyrans	1-benzopyrans		0.764	55617
POS_16968	14.556	893.54	Chlorophyll a from Chlorella	[M]+	C55H72MgN4O5	ATNHDLDRLWWWCB-ZPPYAHEGSA-M	[Mg++].CCC1=C(C)C2=NC1=CC3=C(C)C4=C([N-]3)C(=C5N=C(C=C6[N-]C(=C2)C(=C6C)C=C)C(C)C5CCC(=O)OCC=C(C)CCCC(C)CCCC(C)CCCC(C)C)C(C(=O)OC)C4=O	Organoheterocyclic compounds	Tetrapyrroles and derivatives	Chlorins		0.865	1178962
POS_17081	14.545	907.51	Chlorophyll b from Chlorella	[M]+	C55H70MgN4O6	MSLKMRUEVOYOOZ-FCFLHPMBSA-L	[Mg++].CCC1=C(C=O)C2=NC1=CC3=C(C)C4=C([N-]3)C(=C5N=C(C=C6[N-]C(=C2)C(=C6C)C=C)C(C)C5CCC(=O)OCC=C(C)CCCC(C)CCCC(C)CCCC(C)C)C(C(=O)OC)C4=O	Organoheterocyclic compounds	Tetrapyrroles and derivatives	Chlorins		0.874	11168449
POS_190	0.68	104.102	Choline	[M]+	C5H14NO	OEYIOHPDSNJKLS-UHFFFAOYSA-N	C[N+](C)(C)CCO	Organic nitrogen compounds	Organonitrogen compounds	Quaternary ammonium salts	C00114	0.828	4118303
POS_3981	5.331	307.112	Cimifugin	[M+H]+	C16H18O6	ATDBDSBKYKMRGZ-ZDUSSCGKSA-N	COC1=C2CC(OC2=CC3=C1C(=O)C=C(CO)O3)C(C)(C)O	Organoheterocyclic compounds	Benzopyrans	1-benzopyrans		0.731	122660
POS_1242	2.971	181.048	cis-Caffeic acid	[M+H]+	C9H8O4	QAIPRVGONGVQAS-RQOWECAXSA-N	OC(=O)\\C=C/C1=CC=C(O)C(=C1)O	Phenylpropanoids and polyketides	Cinnamic acids and derivatives	Hydroxycinnamic acids and derivatives		0.826	44216
POS_1689	5.354	207.062	Citropten	[M+H]+	C11H10O4	NXJCRELRQHZBQA-UHFFFAOYSA-N	COC1=CC(=C2C=CC(=O)OC2=C1)OC	Phenylpropanoids and polyketides	Coumarins and derivatives			0.789	160943
POS_2577	10.971	251.197	Clareolide	[M+H]+	C16H26O2	IMKJGXCIJJXALX-SHUKQUCYSA-N	C[C@]12CCCC([C@@H]1CC[C@@]3([C@@H]2CC(=O)O3)C)(C)C					0.725	76669
POS_6779	3.3	400.177	Colchicine	[M+H]+	C22H25NO6	IAKHMKGGTNLKSZ-INIZCTEOSA-N	COC1=CC=C2C(=CC1=O)[C@H](CCC3=C2C(=C(OC)C(=C3)OC)OC)N=C(C)O	Hydrocarbon derivatives	Tropones			0.727	51162
POS_948	4.413	163.073	Coniferyl alcohol	[M+H-H2O]+		JMFRWRFFLBVWSI-NSCUHMNNSA-N	COC1=C(O)C=CC(=C1)\\C=C\\CO	Benzenoids	Phenols	Methoxyphenols	C00590	0.738	18290848
POS_4358	0.811	321.11	Corylin	[M+H]+	C20H16O4	PWAACAMQKVIVPZ-UHFFFAOYSA-N	CC1(C)OC2=C(C=C1)C=C(C=C2)C3=COC4=CC(=CC=C4C3=O)O	Phenylpropanoids and polyketides	Isoflavonoids	Pyranoisoflavonoids		0.842	99647
POS_2190	5.732	233.149	Costunolide	[M+H]+	C15H20O2	HRYLQFBHBWLLLL-AHNJNIBGSA-N	C\\C1=C/CC\\C(=C\\[C@H]2OC(=O)C(=C)[C@@H]2CC1)C	Lipids and lipid-like molecules	Prenol lipids	Terpene lactones		0.711	179505
POS_673	3.547	147.041	Coumarin	[M+H]+		ZYGHJZDHTFUPRJ-UHFFFAOYSA-N	O=C1OC2=C(C=CC=C2)C=C1	Phenylpropanoids and polyketides	Coumarins and derivatives		C05851	0.755	290921
POS_4906	3.536	339.101	Coumaroylquinic acid	[M+H]+	C16H18O8	BMRSEYFENKXDIS-OTCYKTEZSA-N	OC1CC(O)(CC(OC(=O)C=CC2=CC=C(O)C=C2)C1O)C(O)=O	Organic oxygen compounds	Organooxygen compounds	Alcohols and polyols		0.815	226534
POS_11987	10.959	581.318	Cyanidin 3-O-beta-D-sambubioside	[M]+	C26H29O15	ZPPQIOUITZSYAO-AOBOYTTNSA-O	OCC1OC(OC2=CC3=C(C=C(O)C=C3O)[O+]=C2C4=CC=C(O)C(=C4)O)C(OC5OCC(O)C(O)C5O)C(O)C1O	Phenylpropanoids and polyketides	Flavonoids	Flavonoid glycosides		0.711	57234
POS_3962	13.568	306.274	Cyclic cmp	[M+H]+	C9H12N3O7P	WCPTXJJVVDAEMW-XVFCMESISA-N	NC1=NC(=O)N(C=C1)[C@@H]2O[C@@H]3CO[P](O)(=O)O[C@H]3[C@H]2O	Organic oxygen compounds	Organooxygen compounds	Carbohydrates and carbohydrate conjugates		0.845	527799
POS_6572	4.583	393.203	Cylindrol B	[M+Na]+	C23H30O4	AQCKKGIVKOHRLM-HBFAXEOFSA-N	CC1CCC(=O)C(C)C1(C)C=CC(C)=CCC2=C(O)C=C(C)C(=C2O)C=O	Organic oxygen compounds	Organooxygen compounds	Carbonyl compounds		0.795	178897
POS_2408	1.042	244.088	Cytidine	[M+H]+	C9H13N3O5	UHDGCWIWMRVCDJ-XVFCMESISA-N	NC1=NC(=O)N(C=C1)[C@@H]2O[C@H](CO)[C@@H](O)[C@H]2O	Nucleosides, nucleotides, and analogues	Pyrimidine nucleosides			0.718	11014
POS_1221	0.669	180.083	D-Glucosamine	[M+H]+	C6H13NO5	MSWZFWKMSRAUBD-IVMDWMLBSA-N	N[C@H]1C(O)O[C@H](CO)[C@@H](O)[C@@H]1O	Organic oxygen compounds	Organooxygen compounds	Carbohydrates and carbohydrate conjugates	C00329	0.77	410261
POS_9263	9.766	481.27	Decaethylene glycol	[M+Na]+	C20H42O11	DTPCFIHYWYONMD-UHFFFAOYSA-N	OCCOCCOCCOCCOCCOCCOCCOCCOCCOCCO	Organic oxygen compounds	Organooxygen compounds	Ethers		0.736	385224
POS_6417	8.611	389.117	Demethylnobiletin	[M+H]+	C20H20O8	DOFJNFPSMUCECH-UHFFFAOYSA-N	COC1=C(OC)C=C(C=C1)C2=CC(=O)C3=C(O)C(=C(OC)C(=C3O2)OC)OC	Phenylpropanoids and polyketides	Flavonoids	O-methylated flavonoids		0.761	43398
POS_4408	3.08	323.105	Desmedipham	[M+Na]+	C16H16N2O4	WZJZMXBKUWKXTQ-UHFFFAOYSA-N	CCOC(=O)NC1=CC=CC(=C1)OC(=O)NC2=CC=CC=C2	Benzenoids	Benzene and substituted derivatives	Phenylcarbamic acid esters		0.727	58984
POS_12036	11.663	583.405	Diadinochrome A	[M+H]+	C40H54O3	USOIUYXBYYVLLZ-PMBXBIOBSA-N	CC1=C(C#C\\C(C)=C\\C=C\\C(C)=C\\C=C\\C=C(C)\\C=C\\C=C(/C)[C@H]2O[C@]3(C)C[C@@H](O)CC(C)(C)C3=C2)C(C)(C)C[C@H](O)C1	Lipids and lipid-like molecules	Prenol lipids	Triterpenoids		0.743	398936
POS_12545	5.037	605.209	Diadinoxanthin A	[M+Na]+	C40H54O3	CQEFYCLCHZUMAF-ACABJTFYSA-N	CC1=C(C#CC(C)=CC=CC(C)=CC=CC=C(C)C=CC=C(C)C=CC23OC2(C)CC(O)(O)CC3(C)C)C(C)(C)CCC1	Lipids and lipid-like molecules	Prenol lipids	Triterpenoids		0.728	108785
POS_3922	1.218	305.113	Diazinon	[M+H]+	C12H21N2O3PS	FHIVAFMUCKRCQO-UHFFFAOYSA-N	CCO[P](=S)(OCC)OC1=NC(=NC(=C1)C)C(C)C	Organic acids and derivatives	Organic thiophosphoric acids and derivatives	Thiophosphoric acid esters	C14324	0.72	28925
POS_3228	9.903	279.155	Dibutyl phthalate	[M+H]+	C16H22O4	DOIRQSBPFJWKBE-UHFFFAOYSA-N	CCCCOC(=O)C1=CC=CC=C1C(=O)OCCCC	Benzenoids	Benzene and substituted derivatives	Benzoic acids and derivatives	C14214	0.883	665693
POS_1422	7.269	192.134	Diethyltoluamide	[M+H]+	C12H17NO	MMOXZBCLCQITDF-UHFFFAOYSA-N	CCN(CC)C(=O)C1=CC(=CC=C1)C	Benzenoids	Benzene and substituted derivatives	Toluenes		0.813	81026
POS_2893	4.501	265.139	Dihydro-3-methylene-4-[(2E)-3-methyl-4-(tetrahydro-4-methyl-5-oxo-2-furanyl)-2-buten-1-yl]-, (4R)-2(3H)-furanone,	[M+H]+	C15H20O4	KFKSQOIZZRZEFC-BZFAMWISSA-N	CC1CC(CC(C)=CCC2COC(=O)C2=C)OC1=O	Lipids and lipid-like molecules	Prenol lipids	Terpene lactones		0.73	130795
POS_11450	6.127	559.299	Dihydrocelastryl diacetate	[M+Na]+	C33H44O6	SAOOBRUHTPONGX-UANCAJPASA-N	CC(=O)OC1=C(OC(C)=O)C(=C2CC=C3C(C)(CCC4(C)C5CC(C)(CCC5(C)CCC34C)C(O)=O)C2=C1)C	Benzenoids	Phenanthrenes and derivatives			0.8	149871
POS_6514	12.593	391.277	Dioctyl phthalate	[M+H]+	C24H38O4	MQIUGAXCHLFZKX-UHFFFAOYSA-N	CCCCCCCCOC(=O)C1=C(C=CC=C1)C(=O)OCCCCCCCC	Benzenoids	Benzene and substituted derivatives	Benzoic acids and derivatives		0.884	7513318
POS_16943	9.253	891.456	Dioscin	[M+Na]+		VNONINPVFQTJOC-ZGXDEBHDSA-N	C[C@@H]1CC[C@@]2(OC1)O[C@H]3C[C@H]4[C@@H]5CC=C6C[C@H](CC[C@]6(C)[C@H]5CC[C@]4(C)[C@H]3[C@@H]2C)O[C@@H]7O[C@H](CO)[C@@H](O[C@@H]8O[C@@H](C)[C@H](O)[C@@H](O)[C@H]8O)[C@H](O)[C@H]7O[C@@H]9O[C@@H](C)[C@H](O)[C@@H](O)[C@H]9O	Lipids and lipid-like molecules	Steroids and steroid derivatives	Steroidal glycosides		0.722	28597
POS_13143	5.469	631.155	Diosmetin-7-O-rutinoside	[M+Na]+	C28H32O15	GZSOSUNBTXMUFQ-UHFFFAOYSA-N	COC1=CC=C(C=C1O)C2=CC(=O)C3=C(O2)C=C(OC4OC(COC5OC(C)C(O)C(O)C5O)C(O)C(O)C4O)C=C3O	Phenylpropanoids and polyketides	Flavonoids	Flavonoid glycosides	C10039	0.739	605338
POS_476	0.878	132.1	DL-Isoleucine	[M+H]+	C6H13NO2	AGPKZVBTJJNPAG-UHFFFAOYSA-N	CCC(C)C(N)C(O)=O	Organic acids and derivatives	Carboxylic acids and derivatives	Amino acids, peptides, and analogues	C16434	0.855	130697
POS_2895	8.894	265.141	Dormin	[M+H]+	C15H20O4	JLIDBLDQVAYHNE-LXGGSRJLSA-N	CC(C=CC1(O)C(=CC(=O)CC1(C)C)C)=CC(O)=O	Lipids and lipid-like molecules	Prenol lipids	Sesquiterpenoids		0.705	173170
POS_4890	13.143	338.339	Erucamide	[M+H]+	C22H43NO	UAUDZVJPLUQNMU-KTKRTIGZSA-N	CCCCCCCCC=CCCCCCCCCCCCC(O)=N	Lipids and lipid-like molecules	Fatty Acyls	Fatty amides		0.944	350709568
POS_1493	4.228	197.077	Ethyl vanillate	[M+H]+	C10H12O4	MWAYRGBWOVHDDZ-UHFFFAOYSA-N	CCOC(=O)C1=CC(=C(O)C=C1)OC	Benzenoids	Benzene and substituted derivatives	Benzoic acids and derivatives		0.804	116136
POS_983	5.433	165.089	Eugenol	[M+H]+	C10H12O2	RRAFCDWBNXTKKO-UHFFFAOYSA-N	COC1=CC(=CC=C1O)CC=C	Benzenoids	Phenols	Methoxyphenols	C10453	0.717	551601
POS_7076	13.886	409.374	Euphol	[M+H-H2O]+		CAHGCLMLTWQZNJ-UHFFFAOYSA-N	C[C@H](CCC=C(C)C)[C@@H]1CC[C@]2([C@]1(CCC3=C2CC[C@@H]4[C@@]3(CC[C@@H](C4(C)C)O)C)C)C					0.708	840727
POS_2041	9.903	225.161	Falcarindiol	[M+H]+	C17H24O2	QWCNQXNAFCBLLV-YWALDVPYSA-N	CCCCCCC\\C=C/[C@H](O)C#CC#C[C@H](O)C=C	Lipids and lipid-like molecules	Fatty Acyls	Fatty alcohols		0.879	231795
POS_3908	12.044	304.258	Fenpropimorph	[M+H]+	C20H33NO	RYAUSSKQMZRMAI-ALOPSCKCSA-N	CC(CN1CC(C)OC(C)C1)CC2=CC=C(C=C2)C(C)(C)C	Benzenoids	Benzene and substituted derivatives	Phenylpropanes		0.817	67663864
POS_4840	9.691	337.23	Fentanyl	[M+H]+	C22H28N2O	PJMPHNIQZUBGLI-UHFFFAOYSA-N	CCC(=O)N(C1CCN(CC1)CCC2=CC=CC=C2)C3=CC=CC=C3	Organoheterocyclic compounds	Piperidines	Fentanyls		0.782	132059
POS_3980	5.165	307.11	Fluconazole	[M+H]+	C13H12F2N6O	RFHAOTPXVQNOHP-UHFFFAOYSA-N	OC(C[N]1C=NC=N1)(C[N]2C=NC=N2)C3=C(F)C=C(F)C=C3	Benzenoids	Benzene and substituted derivatives	Halobenzenes		0.756	133104
POS_7504	8.994	423.227	Fludrocortisone acetate	[M+H]+	C23H31FO6	SYWHXTATXSMDSB-GSLJADNHSA-N	CC(=O)OCC(=O)[C@@]1(O)CC[C@H]2[C@@H]3CCC4=CC(=O)CC[C@]4(C)[C@@]3(F)[C@@H](O)C[C@]12C	Lipids and lipid-like molecules	Steroids and steroid derivatives	Pregnane steroids	C00762	0.779	669423
POS_1985	4.379	223.055	Fraxidin	[M+H]+	C11H10O5	QNFBKOHHLAWWTC-UHFFFAOYSA-N	COC1=C(OC)C(=C2OC(=O)C=CC2=C1)O	Phenylpropanoids and polyketides	Coumarins and derivatives	Hydroxycoumarins	C17479	0.865	124038
POS_6184	7.866	381.124	Fumiquinazoline F	[M+Na]+	C21H18N4O2	SUVZUTHVKIBYOH-KPZWWZAWSA-N	C[C@@H]1NC(=O)[C@@H](CC2=C[NH]C3=CC=CC=C23)N4C(=O)C5=CC=CC=C5N=C14	Organoheterocyclic compounds	Diazanaphthalenes	Benzodiazines		0.711	584209
POS_20	0.669	69.0319	Furan	[M+H]+	C4H4O	YLQBMQCUIZJEEH-UHFFFAOYSA-N	C1=COC=C1					0.722	106447
POS_3081	7.531	273.179	Galaxolidone	[M+H]+	C18H24O2	PGMHPYRIXBRRQD-UHFFFAOYSA-N	CC1COC(=O)C2=CC3=C(C=C12)C(C)(C)C(C)C3(C)C	Organoheterocyclic compounds	Benzopyrans	2-benzopyrans		0.729	81032
POS_16632	5.54	861.219	gamma-Aminobutyrate	[M+Na]+	C4H9NO2	BTCSSZJGUNDROE-UHFFFAOYSA-N	NCCCC(O)=O	Organic acids and derivatives	Carboxylic acids and derivatives	Amino acids, peptides, and analogues		0.728	11584
POS_7115	6.393	411.19	gamma-Tocotrienol	[M+H]+	C28H42O2	OTXNTMVVOOBZCV-WAZJVIJMSA-N	CC(C)=CCCC(C)=CCCC(C)=CCCC1(C)CCC2=CC(=C(C)C(=C2O1)C)O	Lipids and lipid-like molecules	Prenol lipids	Quinone and hydroquinone lipids	C14155	0.741	157992
POS_7170	6.247	413.205	Gardneramine	[M+H]+	C23H28N2O5	RIMDDIPKIZTBHU-KPDHXFAYSA-N	COC\\C=C1/CN2[C@H]3CC45C2C[C@H]1[C@@H]3COC4=NC6=C5C(=C(OC)C=C6OC)OC	Organoheterocyclic compounds	Indoles and derivatives	Indoles		0.818	95432
POS_4536	4.944	327.172	Gelsenicine	[M+H]+	C19H22N2O3	BIGABVPVCRHEES-NWPJSNQLSA-N	CCC1=N[C@H]2C[C@]3([C@H]4C[C@@H]1[C@@H]2CO4)C(=O)N(OC)C5=CC=CC=C35	Organoheterocyclic compounds	Indoles and derivatives			0.84	1844921
POS_1908	6.822	219.169	Germacrone	[M+H]+	C15H22O	CAULGCQHVOVVRN-SWZPTJTJSA-N	C/C/1=C\\CC(=C(C)C)C(=O)C/C(=C/CC1)/C					0.832	193237
POS_3673	2.959	295.125	Glutamylphenylalanine	[M+H]+	C14H18N2O5	XHHOHZPNYFQJKL-UHFFFAOYSA-N	NC(CCC(=O)NC(CC1=CC=CC=C1)C(O)=O)C(O)=O	Organic acids and derivatives	Carboxylic acids and derivatives	Amino acids, peptides, and analogues		0.766	73032
POS_5562	12.67	359.31	Glyceryl monostearate	[M+H]+	C21H42O4	VBICKXHEKHSIBG-UHFFFAOYSA-N	CCCCCCCCCCCCCCCCCC(=O)OCC(O)CO	Lipids and lipid-like molecules	Glycerolipids	Monoradylglycerols		0.713	1908663
POS_5224	12.076	348.307	Glyceryl palmitate	[M+NH4]+	C19H38O4	QHZLMUACJMDIAE-UHFFFAOYSA-N	CCCCCCCCCCCCCCCC(=O)OCC(O)CO	Lipids and lipid-like molecules	Glycerolipids	Monoradylglycerols		0.811	136200
POS_3995	13.474	307.22	h_61_17_Epioxandrolone	[M+H]+	C19H30O3	QSLJIVKCVHQPLV-ZXOYHYBESA-N	C[C@@]1(O)CCC2C3CCC4CC(=O)OC[C@]4(C)C3CC[C@]12C	Lipids and lipid-like molecules	Steroids and steroid derivatives	Steroid lactones		0.715	588897
POS_3570	8.099	291.189	h_92_Oxabolone	[M+H]+	C18H26O3	GXHBCWCMYVTJOW-DNBWYCQVSA-N	C[C@]12CCC3C(CCC4=C(O)C(=O)CCC34)C1CC[C@@H]2O	Lipids and lipid-like molecules	Steroids and steroid derivatives	Estrane steroids		0.738	799022
POS_15659	3.686	777.221	Hedysarimcoumestan D	[M+Na]+	C34H42O19	FHIJMQWMMZEFBL-OPSYHMPNSA-N	COC1=C(O)C(=CC(=C1)C=CC(=O)OCC2OC(OC3(CO)OC(CO)C(O)C3OC(=O)C=CC4=CC(=C(O)C(=C4)OC)OC)C(O)C(O)C2O)OC	Phenylpropanoids and polyketides	Cinnamic acids and derivatives	Hydroxycinnamic acids and derivatives		0.768	13135
POS_1471	10.43	195.12	Hexylresorcinol	[M+H]+	C12H18O2	WFJIVOKAWHGMBH-UHFFFAOYSA-N	CCCCCCC1=CC=C(O)C=C1O	Benzenoids	Phenols	Benzenediols		0.784	1733376
POS_5844	6.295	369.215	Hirsutine	[M+H]+	C22H28N2O3	NMLUOJBSAYAYEM-GZRFBZBPSA-N	CC[C@H]1CN2CCC3=C([C@H]2C[C@@H]1C(=COC)C(=O)OC)NC4=CC=CC=C34					0.718	70698
POS_365	0.713	124.036	Hydron;pyridine-3-carboxylate	[M+H]+	C6H5NO2	PVNIIMVLHYAWGP-UHFFFAOYSA-N	OC(=O)C1=CC=CN=C1	Organoheterocyclic compounds	Pyridines and derivatives	Pyridinecarboxylic acids and derivatives		0.82	83123
POS_9411	5.481	487.076	Hyperoside	[M+Na]+		OVSQVDMCBVZWGM-DTGCRPNFSA-N	OCC1OC(OC2=C(OC3=C(C(=CC(=C3)O)O)C2=O)C4=CC(=C(O)C=C4)O)C(O)C(O)C1O	Phenylpropanoids and polyketides	Flavonoids	Flavonoid glycosides	C10073	0.71	616115
POS_7570	4.501	425.138	Icariside F2	[M+Na]+	C18H26O10	NJMQSVWMCODQIP-FQXXIRCGSA-N	OC[C@@]1(O)CO[C@@H](OC[C@H]2O[C@@H](OCC3=CC=CC=C3)[C@H](O)[C@@H](O)[C@@H]2O)[C@@H]1O	Organic oxygen compounds	Organooxygen compounds	Carbohydrates and carbohydrate conjugates		0.827	3503334
POS_7710	6.405	429.182	Ilicicolin C	[M+Na]+	C23H31ClO4	IJEHYEVNWOYGMS-WGUBEYSISA-N	C[C@@H]1CCC(=O)[C@H](C)[C@@]1(C)CC\\C(C)=C\\CC2=C(O)C(=C(C)C(=C2O)Cl)C=O	Organic oxygen compounds	Organooxygen compounds	Carbonyl compounds		0.711	176990
POS_5245	4.298	349.18	Imidocarb	[M+H]+	C19H20N6O	SCEVFJUWLLRELN-UHFFFAOYSA-N	O=C(NC1=CC(=CC=C1)C2=NCCN2)NC3=CC(=CC=C3)C4=NCCN4	Benzenoids	Benzene and substituted derivatives	N-phenylureas		0.819	209365
POS_664	5.319	146.057	Indole-3-carboxaldehyde	[M+H]+	C9H7NO	OLNJUISKUQQNIM-UHFFFAOYSA-N	O=CC1=C[NH]C2=C1C=CC=C2	Organoheterocyclic compounds	Indoles and derivatives	Indoles	C08493	0.911	335321
POS_4240	7.976	316.18	Intermedine N-oxide	[M+H]+	C15H25NO6	DNAWGBOKUFFVMB-JXSDSIQZSA-N	CC(C)[C@](O)([C@@H](C)O)C(=O)OCC1=CC[N+]2([O-])CC[C@@H](O)[C@@H]12	Alkaloids and derivatives				0.717	78812
POS_9784	4.792	499.118	Isochlorogenic acid A	[M-H2O+H]+	C25H24O12	KRZBCHWVBQOTNZ-RDJMKVHDSA-N	O[C@@H]1[C@@H](C[C@](O)(C[C@H]1OC(=O)\\C=C\\C2=CC(=C(O)C=C2)O)C(O)=O)OC(=O)\\C=C\\C3=CC(=C(O)C=C3)O	Organic oxygen compounds	Organooxygen compounds	Alcohols and polyols		0.818	2573938
POS_10877	5.107	539.108	Isochlorogenic acid b	[M+Na]+		UFCLZKMFXSILNL-BBLPPJRLSA-N	O[C@@H]1C[C@](O)(C[C@@H](OC(=O)C=CC2=CC(=C(O)C=C2)O)[C@@H]1OC(=O)C=CC3=CC(=C(O)C=C3)O)C(O)=O	Organic oxygen compounds	Organooxygen compounds	Alcohols and polyols		0.738	406518
POS_1461	9.241	195.061	Isoferulic acid	[M+H]+	C10H10O4	QURCVMIEKCOAJU-HWKANZROSA-N	COC1=CC=C(C=CC(O)=O)C=C1O	Phenylpropanoids and polyketides	Cinnamic acids and derivatives	Hydroxycinnamic acids and derivatives	C10470	0.786	18633
POS_8307	4.991	449.103	Isoorientin	[M+H]+	C21H20O11	ODBRNZZJSYPIDI-VJXVFPJBSA-N	OCC1OC(C(O)C(O)C1O)C2=C(O)C3=C(OC(=CC3=O)C4=CC(=C(O)C=C4)O)C=C2O	Phenylpropanoids and polyketides	Flavonoids	Flavonoid glycosides		0.934	3388543
POS_12670	4.886	611.152	Isoorientin 2''-O-glucopyranoside	[M+H]+	C27H30O16	QWAZWXOCSOFIPS-UHFFFAOYSA-N	OCC1OC(OC2C(O)C(O)C(CO)OC2C3=C(O)C4=C(OC(=CC4=O)C5=CC=C(O)C(=C5)O)C=C3O)C(O)C(O)C1O	Phenylpropanoids and polyketides	Flavonoids	Flavonoid glycosides		0.756	92900
POS_11589	4.921	565.149	Isoschaftoside	[M+H]+	C26H28O14	OVMFOVNOXASTPA-VYUBKLCTSA-N	OC[C@H]1O[C@H]([C@H](O)[C@@H](O)[C@@H]1O)C2=C3OC(=CC(=O)C3=C(O)C(=C2O)[C@@H]4OC[C@H](O)[C@H](O)[C@H]4O)C5=CC=C(O)C=C5	Phenylpropanoids and polyketides	Flavonoids	Flavonoid glycosides		0.871	2602654
POS_8739	5.481	463.116	Isoscoparin	[M+H]+	C22H22O11	KOMUHHCFAXYRPO-DGHBBABESA-N	COC1=C(O)C=CC(=C1)C2=CC(=O)C3=C(O)C(=C(O)C=C3O2)C4OC(CO)C(O)C(O)C4O	Phenylpropanoids and polyketides	Flavonoids	Flavonoid glycosides		0.781	324885
POS_1431	4.944	193.047	Isoscopoletin	[M+H]+	C10H8O4	SYTYLPHCLSSCOJ-UHFFFAOYSA-N	COC1=C(C=C2C=CC(=O)OC2=C1)O					0.915	313044
POS_11590	5.271	565.149	Isovitexin 2''-O-arabinoside	[M+H]+	C26H28O14	ACRIYYKEWCXQOS-XAYOXWHSSA-N	OCC1OC(C(OC2OCC(O)C(O)C2O)C(O)C1O)C3=C(O)C=C4OC(=CC(=O)C4=C3O)C5=CC=C(O)C=C5	Phenylpropanoids and polyketides	Flavonoids	Flavonoid glycosides		0.822	810117
POS_1972	9.216	221.187	Jaeschkeanadiol	[M-H2O+H]+	C15H26O2	SUAPQGLGNKUSLY-LJISPDSOSA-N	CC(C)C1(O)CCC2(C)CC=C(C)CC(O)C12	Lipids and lipid-like molecules	Prenol lipids	Sesquiterpenoids		0.822	145633
POS_1256	5.66	181.118	Jasmolone	[M+H]+	C11H16O2	SVRKACAGHUZSGU-SNAWJCMRNA-N	O=C1C(=C(C)C(O)C1)CC=CCC					0.72	76266
POS_6241	2.802	383.122	Junipediol A 8-glucoside	[M+Na]+	C16H24O9	REHZVRNVHQFBAF-YLHHEPAUSA-N	COC1=CC(=CC=C1O)C(CO)COC2OC(CO)C(O)C(O)C2O	Organic oxygen compounds	Organooxygen compounds	Carbohydrates and carbohydrate conjugates		0.712	30970
POS_6101	8.736	378.255	Karakoline	[M+H]+	C22H35NO4	HKQZUYOVMYOFIT-VHNBHZRZSA-N	CCN1C[C@]2(C)CC[C@H](O)[C@@]34[C@@H]5C[C@H]6[C@H](O)[C@@H]5[C@](O)(C[C@@H]6OC)[C@@H](C[C@H]23)C14	Lipids and lipid-like molecules	Prenol lipids	Diterpenoids		0.7	83309
POS_7026	3.789	409.104	Khelloside	[M+H]+	C19H20O10	SJRACCTZSAUMGO-WIMVFMHDSA-N	COC1=C2C=COC2=CC3=C1C(=O)C=C(COC4OC(CO)C(O)C(O)C4O)O3	Organoheterocyclic compounds	Benzopyrans	1-benzopyrans		0.763	216977
POS_8026	0.735	439.133	Kotanin	[M+H]+	C24H22O8	CSJOUDOXDHMIAH-UHFFFAOYSA-N	COC1=CC(=O)OC2=C1C(=CC(=C2C3=C(OC)C=C(C)C4=C3OC(=O)C=C4OC)OC)C	Phenylpropanoids and polyketides	Coumarins and derivatives			0.719	33399
POS_12746	13.593	613.475	L-Glutathione (oxidized form)	[M+H]+	C20H32N6O12S2	YPZRWBKMTBYPTK-BJDJZHNGSA-N	NC(CCC(O)=NC(CSSCC(N=C(O)CCC(N)C(O)=O)C(O)=NCC(O)=O)C(O)=NCC(O)=O)C(O)=O	Organic acids and derivatives	Carboxylic acids and derivatives	Amino acids, peptides, and analogues		0.801	13633403
POS_475	1.173	132.1	L-Norleucine	[M+H]+	C6H13NO2	LRQKBLKVPFOOQJ-YFKPBYRVSA-N	CCCCC(N)C(O)=O	Organic acids and derivatives	Carboxylic acids and derivatives	Amino acids, peptides, and analogues	C01933	0.881	292663
POS_1402	5.201	191.104	Ligustilide	[M+H]+	C12H14O2	IQVQXVFMNOFTMU-FLIBITNWSA-N	CCCC=C1OC(=O)C2=C1CCC=C2	Organoheterocyclic compounds	Isobenzofurans			0.732	70071
POS_4002	11.034	307.257	Linolenic acid ethyl ester	[M+H]+	C20H34O2	JYYFMIOPGOFNPK-XSHSMGBESA-N	CC/C=C/C/C=C/C/C=C/CCCCCCCC(=O)OCC					0.778	118628
POS_7166	4.345	413.136	Loganin	[M+Na]+		AMBQHHVBBHTQBF-UOUCRYGSSA-N	COC(=O)C1=COC(OC2OC(CO)C(O)C(O)C2O)C3C(C)C(O)CC13	Lipids and lipid-like molecules	Prenol lipids	Terpene glycosides		0.737	50383
POS_1497	5.236	197.113	Loliolide	[M+H]+	C11H16O3	XEVQXKKKAVVSMW-WRWORJQWSA-N	CC1(C)C[C@H](O)C[C@@]2(C)OC(=O)C=C12	Organoheterocyclic compounds	Benzofurans			0.776	102022
POS_7608	12.34	425.373	Lupenone	[M+H]+	C30H48O	GRBHNQFQFHLCHO-FVLNLSKLSA-N	CC(=C)C1CC[C@]2(C1C3CCC4[C@]5(CCC(=O)C(C5CC[C@]4([C@@]3(CC2)C)C)(C)C)C)C					0.703	123051
POS_11247	12.791	551.417	Lutein	[M+H-H2O]+		KBPHJBAIARWVSC-UHFFFAOYSA-N	CC(=CC=CC=C(C)C=CC=C(C)C=CC1=C(C)CC(O)CC1(C)C)C=CC=C(C)C=CC2C(=CC(O)CC2(C)C)C	Lipids and lipid-like molecules	Prenol lipids	Tetraterpenoids		0.809	8242142
POS_11968	4.676	581.142	Luteolin C-glucoside C-xyloside	[M+H]+	C26H28O15	XBGYTZHKGMCEGE-MCIQUCDDSA-N	OCC1OC(C(O)C(O)C1O)C2=C(O)C3=C(OC(=CC3=O)C4=CC(=C(O)C=C4)O)C(=C2O)C5OCC(O)C(O)C5O	Phenylpropanoids and polyketides	Flavonoids	Flavonoid glycosides		0.775	284805
POS_11833	4.921	575.203	Lyoniside	[M+Na]+	C27H36O12	GWDZRGQRNHELQM-UHFFFAOYSA-N	COC1=C(O)C(=CC(=C1)C2C(COC3OCC(O)C(O)C3O)C(CO)CC4=CC(=C(O)C(=C24)OC)OC)OC	Lignans, neolignans and related compounds	Lignan glycosides			0.739	31290
POS_394	3.091	127.036	Maltol	[M+H]+	C6H6O3	XPCTZQVDEJYUGT-UHFFFAOYSA-N	CC1=C(O)C(=O)C=CO1	Organoheterocyclic compounds	Pyrans	Pyranones and derivatives	C11918	0.901	1048629
POS_2461	5.421	247.09	Marmesin	[M+H]+	C14H14O4	FWYSBEAFFPBAQU-LBPRGKRZSA-N	CC(C)(O)[C@@H]1CC2=C(O1)C=C3OC(=O)C=CC3=C2	Phenylpropanoids and polyketides	Coumarins and derivatives	Furanocoumarins		0.793	105017
POS_6057	2.982	377.083	Marticin	[M+H]+	C18H16O9	HNMWDXUKPJZOQD-UHFFFAOYSA-N	COC1=CC(=O)C2=C(C(=C3CC4(C)OC(CC(O4)C3=C2O)C(O)=O)O)C1=O	Phenylpropanoids and polyketides	Isochromanequinones			0.809	19211714
POS_5548	6.344	359.142	Matairesinol	[M+H]+	C20H22O6	MATGKVZWFZHCLI-LSDHHAIUSA-N	COC1=C(O)C=CC(=C1)C[C@H]2COC(=O)[C@@H]2CC3=CC(=C(O)C=C3)OC	Lignans, neolignans and related compounds	Furanoid lignans	Tetrahydrofuran lignans	C10682	0.719	62766
POS_12540	6.356	605.188	Methyl (4S,5Z,6S)-5-(2-acetyloxyethylidene)-4-[2-[2-(4-hydroxyphenyl)ethoxy]-2-oxoethyl]-6-[(2S,3R,4S,5S,6R)-3,4,5-trihydroxy-6-(hydroxymethyl)oxan-2-yl]oxy-4H-pyran-3-carboxylate	[M+Na]+	C27H34O14	DKRXODJAISNRGA-KIOYJQFDSA-N	COC(=O)C1=COC(OC2OC(CO)C(O)C(O)C2O)C(=CCOC(C)=O)C1CC(=O)OCCC3=CC=C(O)C=C3	Lipids and lipid-like molecules	Prenol lipids	Terpene glycosides		0.726	150090
POS_11250	13.604	551.493	Methyl 18-(hexadecanoyloxy)octadec-9-enoate	[M+H]+	C35H66O4	RIJDLOIIODLITF-KHPPLWFESA-N	O=C(OC)CCCCCCCC=CCCCCCCCCOC(=O)CCCCCCCCCCCCCCC					0.7	390385
POS_10779	4.467	535.224	Methyl 2-[(1R,5R,6R,13S,14S,16S)-14-acetyloxy-6-(furan-3-yl)-1,5,15,15-tetramethyl-8,17-dioxo-7-oxatetracyclo[11.3.1.02,11.05,10]heptadec-10-en-16-yl]acetate	[M+Na]+	C29H36O8	YOTCKRFNSMJTGD-PSWUJVJRSA-N	COC(=O)CC1C(C)(C)C(OC(C)=O)C2CC3=C4CC(=O)OC(C5=COC=C5)C4(C)CCC3C1(C)C2=O	Lipids and lipid-like molecules	Prenol lipids	Triterpenoids		0.74	129439
POS_6992	12.516	407.309	Methyl 4-[(3R,5R,10S,12S,13R)-3,12-dihydroxy-10,13-dimethyl-2,3,4,5,6,7,8,9,11,12,14,15,16,17-tetradecahydro-1H-cyclopenta[a]phenanthren-17-yl]pentanoate	[M+H]+	C25H42O4	ZHUOOEGSSFNTNP-HWAYZWBCSA-N	COC(=O)CCC(C)C1CCC2C3CCC4CC(O)CCC4(C)C3CC(O)C12C	Lipids and lipid-like molecules	Steroids and steroid derivatives	Bile acids, alcohols and derivatives		0.765	609092
POS_6485	3.87	391.096	Methyl chlorogenate	[M+Na]+	C17H20O9	MZNIJRAPCCELQX-AWOKGZDASA-N	COC(=O)C1(O)CC(O)C(O)C(C1)OC(=O)C=CC2=CC=C(O)C(=C2)O	Organic oxygen compounds	Organooxygen compounds	Alcohols and polyols		0.79	3183904
POS_3696	12.753	295.258	Methyl linoleate	[M+H]+	C19H34O2	WTTJVINHCBCLGX-NQLNTKRDSA-N	CCCCC/C=C\\C/C=C\\CCCCCCCC(=O)OC					0.858	137107
POS_2915	0.623	266.161	Mirtazapine	[M+H]+	C17H19N3	RONZAEMNMFQXRA-UHFFFAOYSA-N	CN1CCN2C(C1)C3=C(CC4=CC=CN=C24)C=CC=C3	Organoheterocyclic compounds	Piperazinoazepines		C07570	0.725	295814
POS_14397	7.754	693.406	Monensin	[M+Na]+	C36H62O11	GAOZTHIDHYLHMS-KEOBGNEYSA-N	CCC1(CCC(O1)C2(C)CCC3(CC(O)C(C)C(O3)C(C)C(OC)C(C)C(O)=O)O2)C4OC(CC4C)C5OC(O)(CO)C(C)CC5C	Lipids and lipid-like molecules	Fatty Acyls	Fatty acids and conjugates		0.703	119845
POS_1997	9.791	223.093	Monoisobutylphthalic Acid	[M+H]+	C12H14O4	WXVFMRKUWGIPRB-UHFFFAOYSA-N	CC(C)CC1=CC=CC(=C1C(O)=O)C(O)=O	Benzenoids	Benzene and substituted derivatives	Phenylpropanes		0.709	48928
POS_7420	3.651	421.163	Morusin	[M+H]+	C25H24O6	XFFOMNJIDRDDLQ-UHFFFAOYSA-N	CC(=CCC1=C(OC2=C(C1=O)C(=CC3=C2C=CC(O3)(C)C)O)C4=C(C=C(C=C4)O)O)C					0.806	272768
POS_9792	4.641	499.172	Mundulone acetate	[M+Na]+	C28H28O7	QUQMZWZRFQKNFP-UHFFFAOYSA-N	COC1=C(C=CC2=C1C=CC(C)(C)O2)C3=COC4=C(C=C5CC(OC(C)=O)C(C)(C)OC5=C4)C3=O	Phenylpropanoids and polyketides	Isoflavonoids	Isoflavans		0.796	1326157
POS_1435	6.43	193.082	Myristicin	[M+H]+	C11H12O3	BNWJOHGLIBDBOB-UHFFFAOYSA-N	COC1=C2OCOC2=CC(=C1)CC=C	Organoheterocyclic compounds	Benzodioxoles		C10480	0.773	49628
POS_3647	1.425	294.15	N-Fructosyl isoleucine	[M+H]+	C12H23NO7	VYGRYVGDPYFVCA-UHFFFAOYSA-N	CCC(C)C(NCC1(O)OC(CO)C(O)C1O)C(O)=O					0.736	1353408
POS_3556	3.835	291.093	N-Malonyltryptophan	[M+H]+	C14H14N2O5	OVEAWSPZRGBTSS-UHFFFAOYSA-N	OC(=O)CC(=O)NC(CC1=C[NH]C2=C1C=CC=C2)C(O)=O	Organic acids and derivatives	Carboxylic acids and derivatives	Amino acids, peptides, and analogues		0.737	92800
POS_4505	11.957	326.299	n-Oleoylethanolamine	[M+H]+	C20H39NO2	BOWVQLFMWHZBEF-KTKRTIGZSA-N	CCCCCCCC\\C=C/CCCCCCCC(=O)NCCO	Organic nitrogen compounds	Organonitrogen compounds	Amines		0.711	104605
POS_2138	9.278	230.243	N,N-Dimethyldodecylamine N-oxide	[M+H]+	C14H31NO	SYELZBGXAIXKHU-UHFFFAOYSA-N	CCCCCCCCCCCC[N+](C)(C)[O-]	Organic nitrogen compounds	Organonitrogen compounds	Aminoxides		0.79	221566
POS_5366	1.748	353.082	N(4)-Acetylsulfadimethoxine	[M+H]+	C14H16N4O5S	DQWIIKBKAIPUPY-UHFFFAOYSA-N	COC1=CC(=NC(=N1)N[S](=O)(=O)C2=CC=C(NC(C)=O)C=C2)OC	Benzenoids	Benzene and substituted derivatives	Benzenesulfonamides		0.721	34356
POS_4356	8.833	321.105	N(4)-Acetylsulfamethazine	[M+H]+	C14H16N4O3S	LJKAKWDUZRJNPJ-UHFFFAOYSA-N	CC(O)=NC1=CC=C(C=C1)[S](=O)(=O)NC2=NC(=CC(=N2)C)C	Benzenoids	Benzene and substituted derivatives	Benzenesulfonamides		0.731	118786
POS_3131	7.618	275.194	Nandrolone	[M+H]+	C18H26O2	NPAGDVCDWIYMMC-IZPLOLCNSA-N	CC12CCC3C(CCC4=CC(=O)CCC34)C1CCC2O	Lipids and lipid-like molecules	Steroids and steroid derivatives	Estrane steroids	C07254	0.72	654886
POS_5595	3.547	361.086	Neobavaisoflavone	[M+K]+	C20H18O4	OBGPEBYHGIUFBN-UHFFFAOYSA-N	CC(C)=CCC1=C(O)C=CC(=C1)C2=COC3=C(C=CC(=C3)O)C2=O	Phenylpropanoids and polyketides	Isoflavonoids	Isoflav-2-enes		0.74	1387646
POS_354	1.759	123.053	Nicotinamide	[M+H]+	C6H6N2O	DFPAKSUCGFBDDF-UHFFFAOYSA-N	OC(=N)C1=CC=CN=C1	Organoheterocyclic compounds	Pyridines and derivatives	Pyridinecarboxylic acids and derivatives	C00153	0.885	267301
POS_6851	8.124	403.133	Nobiletin	[M+H]+	C21H22O8	MRIAQLRQZPPODS-UHFFFAOYSA-N	COC1=C(OC)C=C(C=C1)C2=CC(=O)C3=C(OC)C(=C(OC)C(=C3O2)OC)OC	Phenylpropanoids and polyketides	Flavonoids	O-methylated flavonoids	C10112	0.763	63627
POS_7033	5.576	409.144	Nodakenin	[M+H]+	C20H24O9	HXCGUCZXPFBNRD-DNLMCPORSA-N	CC(C)(OC1OC(CO)C(O)C(O)C1O)C2CC3=C(O2)C=C4OC(=O)C=CC4=C3	Phenylpropanoids and polyketides	Coumarins and derivatives	Furanocoumarins		0.854	448352
POS_7979	4.828	437.229	Nonaethylene glycol	[M+Na]+	C18H38O10	YZUUTMGDONTGTN-UHFFFAOYSA-N	OCCOCCOCCOCCOCCOCCOCCOCCOCCO	Organic oxygen compounds	Organooxygen compounds	Ethers		0.789	176140
POS_3603	4.379	293.096	Norcimifugin	[M+H]+	C15H16O6	FHCHSXPHLRBEBR-UHFFFAOYSA-N	CC(C)(C1CC2=C(O1)C=C3C(=C2O)C(=O)C=C(O3)CO)O					0.721	374501
POS_17622	6.601	981.49	O-6-deoxy-alpha-L-mannopyranosyl-(1->4)-O-beta-D-glucopyranosyl-(1->6)-1-O-[(2alpha,3beta,5xi,9xi,13xi,18xi,19xi)-2,3,23-trihydroxy-28-oxours-20-en-28-yl]-beta-D-glucopyranose	[M+Na]+	C48H78O19	ATNAJMVRCNQHAG-AAXSTCLUSA-N	CC1OC(OC2C(O)C(O)C(OCC3OC(OC(=O)C45CCC6(C)C(CCC7C8(C)CC(O)C(O)C(C)(CO)C8CCC67C)C4C(C)C(=CC5)C)C(O)C(O)C3O)OC2CO)C(O)C(O)C1O	Lipids and lipid-like molecules	Prenol lipids	Terpene glycosides		0.741	129440
POS_2755	11.331	259.201	Octadeca-2,4,9-trien-6-yne-1,18-diol	[M+H-H2O]+	C18H28O2	YZQVZNIBOPZYDK-UTKXXTPHSA-N	OCC=CC=CC#CCC=CCCCCCCCCO					0.801	174043
POS_3379	12.516	284.292	Octadecanamide	[M+H]+	C18H37NO	LYRFLYHAGKPMFH-UHFFFAOYSA-N	CCCCCCCCCCCCCCCCCC(N)=O	Organic acids and derivatives	Carboximidic acids and derivatives	Carboximidic acids	C13846	0.795	39291916
POS_8269	4.781	447.175	Orientanol E	[M+Na]+	C25H28O6	LYELCCACUCFABR-UHFFFAOYSA-N	CC(C)=CCC1=C(O)C(=C2OCC(C(=O)C2=C1O)C3=CC=C(O)C=C3O)CC=C(C)C	Phenylpropanoids and polyketides	Isoflavonoids	Isoflavans		0.772	116421
POS_8694	3.812	461.155	Oxytetracycline	[M+H]+	C22H24N2O9	FYDOORKXBWEKQM-GUQPPTOYSA-N	CN(C)C1C2C(O)C3C(=C(O)C4=C(C=CC=C4O)C3(C)O)C(=O)C2(O)C(=O)C(=C(N)O)C1=O	Phenylpropanoids and polyketides	Tetracyclines			0.805	76625
POS_789	4.445	153.123	p-Menth-4(8)-en-3-one	[M+H]+		NZGWDASTMWDZIW-UHFFFAOYSA-N	CC1CCC(=C(C)C)C(=O)C1	Lipids and lipid-like molecules	Prenol lipids	Monoterpenoids	C09893	0.734	212119
POS_5573	0.68	360.146	Palatinose	[M+NH4]+	C12H22O11	PVXPPJIGRGXGCY-TZLCEDOOSA-N	OCC1OC(OCC2OC(O)(CO)C(O)C2O)C(O)C(O)C1O	Organic oxygen compounds	Organooxygen compounds	Carbohydrates and carbohydrate conjugates		0.872	1757074
POS_2675	11.868	256.261	Palmitic amide	[M+H]+	C16H33NO	HSEMFIZWXHQJAE-UHFFFAOYSA-N	O=C(N)CCCCCCCCCCCCCCC					0.784	55327556
POS_1934	2.559	220.114	Pantothenic acid	[M+H]+	C9H17NO5	GHOKWGTUZJEAQD-ZETCQYMHSA-N	CC(C)(CO)C(O)C(O)=NCCC(O)=O	Organic acids and derivatives	Carboxylic acids and derivatives	Amino acids, peptides, and analogues	C00864	0.789	418520
POS_4209	2.747	315.1	Pantoyl lactone glucoside	[M+Na]+	C12H20O8	BFCZPWYLRHFBNO-DTJAAUDXSA-N	CC1(C)COC(=O)C1OC2OC(CO)C(O)C(O)C2O	Lipids and lipid-like molecules	Fatty Acyls	Fatty acyl glycosides		0.72	94826
POS_4991	10.398	341.2	Pentamidine	[M+H]+	C19H24N4O2	XDRYMKDFEDOLFX-UHFFFAOYSA-N	NC(=N)C1=CC=C(OCCCCCOC2=CC=C(C=C2)C(N)=N)C=C1	Benzenoids	Phenol ethers		C07420	0.762	1830679
POS_4217	9.891	315.19	Pergolide	[M+H]+	C19H26N2S	YEHCICAEULNIGD-MZMPZRCHSA-N	CCCN1CC(CSC)CC2C1CC3=C[NH]C4=CC=CC2=C34	Organoheterocyclic compounds	Quinolines and derivatives	Indoloquinolines	C07425	0.798	1612695
POS_9182	1.284	479.127	Petunidin 3-glucoside	[M]+	C22H23O12	CCQDWIRWKWIUKK-QKYBYQKWSA-O	COC1=C(O)C(=CC(=C1)C2=[O+]C3=C(C=C2OC4OC(CO)C(O)C(O)C4O)C(=CC(=C3)O)O)O	Phenylpropanoids and polyketides	Flavonoids	Flavonoid glycosides	C12139	0.721	33138
POS_7106	3.547	411.122	Phenyl 6-O-[(2R,3R,4R)-3,4-dihydroxy-4-(hydroxymethyl)tetrahydro-2-furanyl]-beta-D-glucopyranoside	[M+Na]+	C17H24O10	YORZZUYHPOREJM-DCSNAHRYSA-N	OC[C@@]1(O)CO[C@@H](OC[C@H]2O[C@@H](OC3=CC=CC=C3)[C@H](O)[C@@H](O)[C@@H]2O)[C@@H]1O	Organic oxygen compounds	Organooxygen compounds	Carbohydrates and carbohydrate conjugates		0.773	40789
POS_338	4.413	121.062	Phenylacetaldehyde	[M+H]+	C8H8O	DTUQWGWMVIHBKE-UHFFFAOYSA-N	O=CCC1=CC=CC=C1	Benzenoids	Benzene and substituted derivatives	Phenylacetaldehydes	C00601	0.756	114318
POS_12272	12.483	593.27	Pheophorbide A	[M+H]+	C35H36N4O5	OINDWIFDMFYGDX-UHFFFAOYSA-N	CCC1=C2[NH]C(=C1C)C=C3[NH]C(=CC4=NC(=C5C(C(=O)OC)C(=O)C6=C(C)C(=C2)N=C56)C(CCC(O)=O)C4C)C(=C3C=C)C	Organoheterocyclic compounds	Tetrapyrroles and derivatives	Chlorins		0.856	163633056
POS_1013	12.593	167.031	Phthalic acid	[M+H]+	C8H6O4	XNGIFLGASWRNHJ-UHFFFAOYSA-N	OC(=O)C1=C(C=CC=C1)C(O)=O	Benzenoids	Benzene and substituted derivatives	Benzoic acids and derivatives	C01606	0.86	633365
POS_710	0.789	149.02	Phthalic anhydride	[M+H]+	C8H4O3	LGRFSURHDFAFJT-UHFFFAOYSA-N	C1=CC=C2C(=C1)C(=O)OC2=O					0.701	158453
POS_1742	4.182	209.115	Pilocarpine	[M+H]+	C11H16N2O2	QCHFTSOMWOSFHM-WPRPVWTQSA-N	CCC1C(COC1=O)CC2=CN=C[N]2C	Alkaloids and derivatives			C07474	0.745	59471
POS_6082	12.803	377.314	Polanrazine B	[M]+	C18H23N3O2S2	JXDWMFMAEDSXNI-QZTJIDSGSA-N	CS[C@@]1(CC2=C[NH]C3=C2C=CC=C3)NC(=O)[C@](NC1=O)(SC)C(C)C	Organic acids and derivatives	Carboxylic acids and derivatives	Amino acids, peptides, and analogues		0.801	394624
POS_8431	3.986	453.131	Polygalatenoside A	[M+Na]+	C19H26O11	RXRSNDCGNOOFLH-VZNNHAMSSA-N	OCC1OCC(OC2OC(COC(=O)C3=CC=CC=C3)C(O)C(O)C2O)C(O)C1O	Organic oxygen compounds	Organooxygen compounds	Carbohydrates and carbohydrate conjugates		0.753	155575
POS_8161	4.863	443.145	Pomiferin	[M+Na]+	C25H24O6	GHCZYXUOYFOXIP-UHFFFAOYSA-N	CC(C)=CCC1=C(O)C2=C(OC=C(C2=O)C3=CC(=C(O)C=C3)O)C4=C1OC(C)(C)C=C4	Phenylpropanoids and polyketides	Isoflavonoids	Isoflavans	C10519	0.727	67268
POS_8904	4.781	469.124	prim-O-b-D-Glucosylcimifugin	[M+H]+	C22H28O11	XIUVHOSBSDYXRG-UVTAEQIVSA-N	COC1=C2CC(OC2=CC3=C1C(=O)C=C(COC4OC(CO)C(O)C(O)C4O)O3)C(C)(C)O	Organoheterocyclic compounds	Benzopyrans	1-benzopyrans		0.819	525095
POS_11949	13.85	579.536	Procyanidin B2	[M+H]+	C30H26O12	XFZJEEAOWLFHDH-NFJBMHMQSA-N	O[C@@H]1CC2=C(O[C@@H]1C3=CC(=C(O)C=C3)O)C(=C(O)C=C2O)[C@@H]4[C@@H](O)[C@H](OC5=CC(=CC(=C45)O)O)C6=CC(=C(O)C=C6)O	Phenylpropanoids and polyketides	Flavonoids	Biflavonoids and polyflavonoids	C17639	0.944	3198268
POS_281	4.368	116.068	Proline	[M+H]+	C5H9NO2	ONIBWKKTOPOVIA-BYPYZUCNSA-N	OC(=O)C1CCCN1	Organic acids and derivatives	Carboxylic acids and derivatives	Amino acids, peptides, and analogues	C00148	0.83	36850
POS_11034	6.686	543.303	Puberanidine	[M+H]+	C30H42N2O7	VSUODASNSRJNCP-WGVBKJPXSA-N	CCN1C[C@@]2(CC[C@H](OC)C34[C@@H]2CC(C13)[C@@]5(O)C[C@H](OC)[C@H]6C[C@@H]4[C@]5(O)[C@H]6OC)OC(=O)C7=CC=CC=C7N	Lipids and lipid-like molecules	Prenol lipids	Diterpenoids		0.738	191510
POS_1058	1.393	170.078	Pyridoxine	[M+H]+	C8H11NO3	LXNHXLLTXMVWPM-UHFFFAOYSA-N	CC1=NC=C(CO)C(=C1O)CO	Organoheterocyclic compounds	Pyridines and derivatives	Pyridoxines	C00314	0.893	187788
POS_4675	1.683	332.128	Pyridoxine + O-Hex	[M+H]+	C14H21NO8	MDLTWTOQCHCLSZ-UHFFFAOYSA-N	CC1=NC=C(COC2OC(CO)C(O)C(O)C2O)C(=C1O)CO	Organoheterocyclic compounds	Pyridines and derivatives	Pyridoxines		0.741	224686
POS_280	0.68	116.068	Pyrrolidin-1-ium-2-carboxylate	[M+H]+	C5H9NO2	ONIBWKKTOPOVIA-UHFFFAOYSA-N	OC(=O)C1CCCN1	Organic acids and derivatives	Carboxylic acids and derivatives	Amino acids, peptides, and analogues		0.901	799247
POS_923	6.007	163.036	Rosmarinic acid	[M+H-C9H10O5]+	C18H16O8	DOUMFZQKYFQNTF-UHFFFAOYSA-N	OC(=O)C(CC1=CC(=C(O)C=C1)O)OC(=O)C=CC2=CC(=C(O)C=C2)O	Phenylpropanoids and polyketides	Cinnamic acids and derivatives	Hydroxycinnamic acids and derivatives		0.72	1337873
POS_13185	5.493	633.131	Rutin	[M+Na]+	C27H30O16	IKGXIBQEEMLURG-NVPNHPEKSA-N	CC1OC(OCC2OC(OC3=C(OC4=C(C(=CC(=C4)O)O)C3=O)C5=CC(=C(O)C=C5)O)C(O)C(O)C2O)C(O)C(O)C1O	Phenylpropanoids and polyketides	Flavonoids	Flavonoid glycosides	C05625	0.734	176602
POS_8261	5.201	447.122	Salicortin	[M+Na]+	C20H24O10	CZDNLUMNELLDDD-QZFWYPLZSA-N	OC[C@H]1O[C@@H](OC2=C(COC(=O)C3(O)C=CCCC3=O)C=CC=C2)[C@H](O)[C@@H](O)[C@@H]1O	Organic oxygen compounds	Organooxygen compounds	Carbohydrates and carbohydrate conjugates		0.771	199832
POS_4286	3.069	318.15	Salidroside	[M+NH4]+	C14H20O7	ILRCGYURZSFMEG-RKQHYHRCSA-N	OCC1OC(OCCC2=CC=C(O)C=C2)C(O)C(O)C1O	Organic oxygen compounds	Organooxygen compounds	Carbohydrates and carbohydrate conjugates		0.775	206911
POS_7873	5.118	434.194	Sayaendoside	[M+NH4]+	C19H28O10	UWKRNCNWJVCHGZ-DERWZFJFSA-N	OCC1OC(OCCC2=CC=CC=C2)C(OC3OCC(O)(CO)C3O)C(O)C1O	Organic oxygen compounds	Organooxygen compounds	Carbohydrates and carbohydrate conjugates		0.73	143354
POS_12111	4.944	587.129	Schaftoside	[M+Na]+		MMDUKUSNQNWVET-WMRYYKKOSA-N	OC[C@H]1O[C@@H]([C@H](O)[C@@H](O)[C@@H]1O)C2=C(O)C(=C3OC(=CC(=O)C3=C2O)C4=CC=C(O)C=C4)[C@@H]5OC[C@H](O)[C@H](O)[C@H]5O	Phenylpropanoids and polyketides	Flavonoids	Flavonoid glycosides		0.826	4310871
POS_1434	4.909	193.082	Scopoletin	[M+H]+	C10H8O4	RODXRVNMMDRFIK-UHFFFAOYSA-N	COC1=CC2=C(OC(=O)C=C2)C=C1O	Phenylpropanoids and polyketides	Coumarins and derivatives	Hydroxycoumarins	C01752	0.775	67161
POS_1621	10.419	203.174	Selina-4(14),7(11)-diene-9-ol;[1S-(1alpha,4abeta,8aalpha)]-Decahydro-8a-methyl-5-methylene-3-(1-methylethylidene)-1-naphthalenol	[M+H-H2O]+	C15H24O	KIWHFBIBAJSYHN-JCUKGLBFNA-N	OC1CC(=C(C)C)CC2C(=C)CCCC12C					0.779	503599
POS_8124	11.708	441.265	Simvastatin	[M+Na]+	C25H38O5	RYMZZMVNJRMUDD-HGQWONQESA-N	CCC(C)(C)C(=O)O[C@H]1C[C@@H](C)C=C2C=C[C@H](C)[C@H](CC[C@@H]3C[C@@H](O)CC(=O)O3)[C@@H]12	Organoheterocyclic compounds	Lactones	Delta valerolactones		0.781	354935
POS_1734	5.343	209.076	Sinapaldehyde	[M+H]+	C11H12O4	CDICDSOGTRCHMG-ONEGZZNKSA-N	COC1=CC(=CC(=C1O)OC)C=CC=O	Benzenoids	Phenols	Methoxyphenols		0.749	166913
POS_1700	4.699	207.135	Sinapoyl malate	[M+K]+	C15H16O9	DUDGAPSRYCQPBG-UFFNRZRYSA-N	COC1=C(O)C(=CC(=C1)C=CC(=O)OC(CC(O)=O)C(O)=O)OC	Phenylpropanoids and polyketides	Cinnamic acids and derivatives	Hydroxycinnamic acids and derivatives		0.719	818419
POS_4465	6.007	325.089	Skimmin	[M+H]+	C15H16O8	VPAOSFFTKWUGAD-TVKJYDDYSA-N	OCC1OC(OC2=CC3=C(C=CC(=O)O3)C=C2)C(O)C(O)C1O	Phenylpropanoids and polyketides	Coumarins and derivatives	Coumarin glycosides		0.715	86126
POS_3074	5.037	273.126	Sotalol	[M+H]+	C12H20N2O3S	ZBMZVLHSJCTVON-UHFFFAOYSA-N	CC(C)NCC(O)C1=CC=C(N[S](C)(=O)=O)C=C1	Benzenoids	Benzene and substituted derivatives	Sulfanilides	C07309	0.745	46442
POS_635	0.702	144.099	Stachydrine	[M+H]+	C7H13NO2	CMUNUTVVOOHQPW-LURJTMIESA-O	C[N+]1(CCC[C@H]1C(=O)O)C					0.745	100732
POS_4767	8.374	335.177	Strychnine sulfate	[M+H]+	C21H22N2O2.1/2H2SO4	GOOCRIHPADOQAS-ZNUXJMJHSA-N	C1CN2CC3=CCO[C@H]4CC(=O)N5[C@H]6[C@H]4[C@H]3C[C@H]2[C@@]61C7=CC=CC=C75.C1CN2CC3=CCO[C@H]4CC(=O)N5[C@H]6[C@H]4[C@H]3C[C@H]2[C@@]61C7=CC=CC=C75.OS(=O)(=O)O					0.848	403969
POS_2428	9.216	245.113	Suberosin	[M+H]+	C15H16O3	RSZDAYHEZSRVHS-UHFFFAOYSA-N	COC1=CC2=C(C=CC(=O)O2)C=C1CC=C(C)C	Phenylpropanoids and polyketides	Coumarins and derivatives			0.875	143573
POS_5721	0.691	365.098	Sucrose	[M+Na]+	C12H22O11	CZMRCDWAGMRECN-UGDNZRGBSA-N	OCC1OC(OC2(CO)OC(CO)C(O)C2O)C(O)C(O)C1O	Organic oxygen compounds	Organooxygen compounds	Carbohydrates and carbohydrate conjugates	C00089	0.87	1174534
POS_6622	4.02	395.126	Syringin	[M+Na]+	C17H24O9	QJVXKWHHAMZTBY-GCPOEHJPSA-N	COC1=C(OC2OC(CO)C(O)C(O)C2O)C(=CC(=C1)C=CCO)OC	Organic oxygen compounds	Organooxygen compounds	Carbohydrates and carbohydrate conjugates		0.701	382393
POS_13885	12.242	667.299	Syrosingopine	[M+H]+	C35H42N2O11	ZCDNRPPFBQDQHR-UHFFFAOYNA-N	CCOC(=O)OC1=C(OC)C=C(C=C1OC)C(=O)OC2CC3CN4CCC5=C([NH]C6=C5C=CC(=C6)OC)C4CC3C(C2OC)C(=O)OC	Alkaloids and derivatives	Yohimbine alkaloids			0.714	234809
POS_5932	11.767	372.307	Tetradecanoylcarnitine	[M+H]+	C21H41NO4	PSHXNVGSVNEJBD-LJQANCHMSA-N	CCCCCCCCCCCCCC(=O)O[C@H](CC([O-])=O)C[N+](C)(C)C	Lipids and lipid-like molecules	Fatty Acyls	Fatty acid esters		0.716	308797
POS_5694	11.443	363.306	Tetraethylene glycol monododecyl ether	[M+H]+	C20H42O5	WPMWEFXCIYCJSA-UHFFFAOYSA-N	CCCCCCCCCCCCOCCOCCOCCOCCO	Organic oxygen compounds	Organooxygen compounds	Ethers		0.766	487476
POS_18131	8.411	1097.53	Thalictoside VI	[M+Na]+	C53H86O22	ATUHGDXZHWBGHX-SXFANQPWSA-N	CC1OC(OC2COC(OC3CCC4(C)C(CCC5(C)C4CC=C6C7CC(C)(C)CCC7(CCC56C)C(=O)OC8OC(CO)C(O)C(O)C8O)C3(C)CO)C(O)C2OC9OC(CO)C(O)C(O)C9O)C(O)C(O)C1O	Lipids and lipid-like molecules	Prenol lipids	Terpene glycosides		0.721	41820
POS_2885	3.686	265.111	Thiamine	[M]+	C12H17N4OS	JZRWCGZRTZMZEH-UHFFFAOYSA-N	CC1=NC(=C(C[N+]2=CSC(=C2C)CCO)C=N1)N	Organoheterocyclic compounds	Diazines	Pyrimidines and pyrimidine derivatives	C00378	0.713	47732
POS_6310	7.606	385.154	THYROTROPIN RELEASING HORMONE	[M+Na]+	C16H22N6O4	XNSAINXGIQZQOO-UHFFFAOYSA-N	C1CC(C(=N)O)N(C1)C(=O)C(CC2=CN=CN2)N=C(C3CCC(=N3)O)O					0.747	194199
POS_4590	4.898	329.15	Tiapride	[M+H]+	C15H24N2O4S	JTVPZMFULRWINT-UHFFFAOYSA-N	CCN(CC)CCNC(=O)C1=C(OC)C=CC(=C1)[S](C)(=O)=O	Benzenoids	Benzene and substituted derivatives	Benzenesulfonyl compounds		0.794	406608
POS_5727	4.874	365.114	Trehalose	[M+Na]+	C12H22O11	HDTRYLNUVZCQOY-LIZSDCNHSA-N	OCC1OC(OC2OC(CO)C(O)C(O)C2O)C(O)C(O)C1O	Organic oxygen compounds	Organooxygen compounds	Carbohydrates and carbohydrate conjugates	C01083	0.732	134632
POS_8168	10.642	443.195	Trichoverrol A	[M+Na]+	C23H32O7	QFKRKMXPKBHGGO-OYWHZMLYSA-N	C[C@H](O)[C@@H](O)\\C=C\\C=C/C(=O)O[C@@H]1C[C@H]2O[C@@H]3C=C(C)CC[C@]3(CO)[C@]1(C)[C@]24CO4	Lipids and lipid-like molecules	Prenol lipids	Sesquiterpenoids		0.738	216605
POS_8900	4.489	469.109	Trifolirhizin	[M+Na]+		VGSYCWGXBYZLLE-QEEQPWONSA-N	OCC1OC(OC2=CC=C3C4OC5=CC6=C(OCO6)C=C5C4COC3=C2)C(O)C(O)C1O	Phenylpropanoids and polyketides	Isoflavonoids	Furanoisoflavonoids		0.808	51871
POS_2938	9.854	267.168	Triisobutyl phosphate	[M+H]+	C12H27O4P	HRKAMJBPFPHCSD-UHFFFAOYSA-N	CC(C)CO[P](=O)(OCC(C)C)OCC(C)C	Organic acids and derivatives	Organic phosphoric acids and derivatives	Phosphate esters		0.794	124031
POS_896	7.057	161.129	Trinoranastreptene	[M+H]+	C12H16	GOAGZWVCKOCSLC-KNBWJCJHNA-N	C1=CC23C(=CCC2C3(C)CC1)C					0.813	142349
POS_4520	9.303	327.073	Triphenyl phosphate	[M+H]+	C18H15O4P	XZZNDPSIHUTMOC-UHFFFAOYSA-N	O=[P](OC1=CC=CC=C1)(OC2=CC=CC=C2)OC3=CC=CC=C3	Organic acids and derivatives	Organic phosphoric acids and derivatives	Phosphate esters	C06017	0.791	30544
POS_563	1.574	138.088	Tyramine	[M+H]+	C8H11NO	DZGWFCGJZKJUFP-UHFFFAOYSA-N	NCCC1=CC=C(O)C=C1	Benzenoids	Benzene and substituted derivatives	Phenethylamines	C00483	0.89	42854
POS_922	4.944	163.036	Umbelliferone	[M+H]+	C9H6O3	ORHBXUUXSCNDEV-UHFFFAOYSA-N	OC1=CC2=C(C=C1)C=CC(=O)O2	Phenylpropanoids and polyketides	Coumarins and derivatives	Hydroxycoumarins	C09315	0.75	348571
POS_257	0.867	113.032	Uracil	[M+H]+	C4H4N2O2	ISAKRJDGNUQOIC-UHFFFAOYSA-N	OC1=NC(=NC=C1)O	Organoheterocyclic compounds	Diazines	Pyrimidines and pyrimidine derivatives	C00106	0.762	22857
POS_955	5.684	163.109	Valerophenone	[M+H]+	C11H14O	XKGLSKVNOSHTAD-UHFFFAOYSA-N	CCCCC(=O)C1=CC=CC=C1	Organic oxygen compounds	Organooxygen compounds	Carbonyl compounds		0.789	154618
POS_4033	4.467	309.159	Vincanidine	[M+H]+	C19H20N2O2	JDOFCMASVRMYJU-JYTRXFNOSA-N	C\\C=C1\\CN2CC[C@@]34[C@@H]2C[C@@H]1C(=C3NC5=C4C=CC=C5O)C=O	Alkaloids and derivatives	Strychnos alkaloids			0.743	53026
POS_5316	7.618	351.21	Vinpocetine	[M+H]+	C22H26N2O2	DDNCQMVWWZOMLN-UHFFFAOYSA-N	CCOC(=O)C1=CC2(CC)CCCN3CCC4=C(C23)[N]1C5=CC=CC=C45	Alkaloids and derivatives	Eburnan-type alkaloids			0.849	5223213
POS_12314	4.594	595.158	Violanone	[M+H]+	C27H30O15	FIAAVMJLAGNUKW-VQVVXJKKSA-N	OCC1OC(C(O)C(O)C1O)C2=C(O)C3=C(OC(=CC3=O)C4=CC=C(O)C=C4)C(=C2O)C5OC(CO)C(O)C(O)C5O	Phenylpropanoids and polyketides	Flavonoids	Flavonoid glycosides	C10195	0.858	185894
POS_12459	5.409	601.145	Violanthin	[M+Na]+	C27H30O14	MVOUGOXRXQDXDC-RSPRXDBDSA-N	CC1OC(C(O)C(O)C1O)C2=C(O)C(=C(O)C3=C2OC(=CC3=O)C4=CC=C(O)C=C4)C5OC(CO)C(O)C(O)C5O	Phenylpropanoids and polyketides	Flavonoids	Flavonoid glycosides		0.84	3383167
POS_11922	5.409	579.161	Vitexin 2''-O-rhamnoside	[M+H]+		LYGPBZVKGHHTIE-HUBYJIGHSA-N	CC1OC(OC2C(O)C(O)C(CO)OC2C3=C(O)C=C(O)C4=C3OC(=CC4=O)C5=CC=C(O)C=C5)C(O)C(O)C1O	Phenylpropanoids and polyketides	Flavonoids	Flavonoid glycosides		0.779	1677183
POS_12311	5.213	595.155	Vitexin-4''-O-glucoside	[M+H]+	C27H30O15	NDSUKTASTPEKBX-LXXMDOISSA-N	OCC1OC(OC2C(O)C(O)C(OC2CO)C3=C4OC(=CC(=O)C4=C(O)C=C3O)C5=CC=C(O)C=C5)C(O)C(O)C1O	Phenylpropanoids and polyketides	Flavonoids	Flavonoid glycosides		0.79	662970
POS_6063	3.08	377.134	Xanthohumol	[M+Na]+	C21H22O5	ORXQGKIUCDPEAJ-YRNVUSSQSA-N	COC1=CC(=C(CC=C(C)C)C(=C1C(=O)C=CC2=CC=C(O)C=C2)O)O	Phenylpropanoids and polyketides	Linear 1,3-diarylpropanoids	Chalcones and dihydrochalcones	C16417	0.754	544623
POS_10673	2.824	531.16	Xolegel	[M+H]+	C26H28Cl2N4O4	XMAYWYJOQHXEEK-OZXSUGGESA-N	CC(=O)N1CCN(CC1)C2=CC=C(OCC3COC(C[N]4C=CN=C4)(O3)C5=CC=C(Cl)C=C5Cl)C=C2	Organoheterocyclic compounds	Diazinanes	Piperazines		0.828	170296
POS_435	0.702	130.047											210352
POS_531	1.393	136.059											809344
POS_665	3.686	146.057											86283
POS_722	4.874	149.057											138565
POS_1006	2.188	166.084											770835
POS_1141	4.955	176.067											52486
POS_1186	2.971	179.031											53784
POS_1236	6.007	181.046											239973
POS_1271	1.075	182.077											75327
POS_1387	3.2	190.048											30549
POS_1433	0.635	193.069											216704
POS_1656	2.993	205.093											855277
POS_1989	5.06	223.057											440275
POS_2153	7.493	231.098											50865
POS_2786	8.773	261.109											985917
POS_2948	2.635	268.1											962789
POS_3237	10.776	279.227											1138477
POS_3365	1.317	284.096											24535
POS_3676	6.115	295.181											270894
POS_3677	6.344	295.183											785755
POS_3871	5.516	303.045											207422
POS_3951	1.727	306.075											89559
POS_4632	11.096	330.333											4920541
POS_4907	4.205	339.101											106628
POS_5221	7.976	348.267											447658
POS_5429	2.971	355.097											5496882
POS_5430	4.489	355.097											762365
POS_5431	5.354	355.097											143745
POS_6056	3.64	377.08											535370
POS_6552	3.686	393.072											96846
POS_7414	3.102	421.128											653629
POS_7831	6.127	433.101											42098
POS_7832	5.236	433.107											533857
POS_7833	5.387	433.107											1919760
POS_8273	7.144	447.214											445640
POS_8304	6.199	449.1											71751
POS_8582	6.078	457.212											912255
POS_8588	6.478	457.233											2622910
POS_8984	11.406	471.224											134040
POS_10562	4.816	527.163											180736

## Sheet: S2
Metabolite qualitative and quantitative results table-negative ions
ID	rt(min)	m/z	Name	adduct	Formula	INCHIKEY	SMILES	Superclass	Class	Subclass	KEGG	score	A
NEG_6106	6.139	413.187	(1S,2S,13R)-22-(2-Methylprop-2-enyl)-14-oxa-11,22-diazaheptacyclo[13.9.1.01,13.02,21.04,12.05,10.019,25]pentacosa-4(12),5,7,9,15,17,19(25)-heptaene-2,16-diol	[M-H]-	C26H26N2O3	ZFMVWAWSKLAVOE-OOGIKFLQSA-N	CC(=C)CN1CCC23C4OC5=C2C(=CC=C5O)CC1C3(O)CC6=C4[NH]C7=C6C=CC=C7	Alkaloids and derivatives	Morphinans			0.734	61811
NEG_7461	6.861	467.222	(2R,3S,4S,5R,6R)-2-[[(2R,3R,4R)-3,4-Dihydroxy-4-(hydroxymethyl)oxolan-2-yl]oxymethyl]-6-oct-1-en-3-yloxyoxane-3,4,5-triol	[M+FA-H]-	C19H34O10	MUPQSGHACLOUTE-PARKKQJRSA-N	CCCCCC(O[C@@H]1O[C@H](CO[C@@H]2OC[C@](O)(CO)[C@H]2O)[C@@H](O)[C@H](O)[C@H]1O)C=C	Lipids and lipid-like molecules	Fatty Acyls	Fatty acyl glycosides		0.723	1193997
NEG_8074	7.087	493.238	(6,6-Dimethylbicyclo[3.1.1]hept-2-yl)methyl 6-O-[(2R,3R,4R)-3,4-dihydroxy-4-(hydroxymethyl)tetrahydro-2-furanyl]-beta-D-glucopyranoside	[M+FA-H]-	C21H36O10	RSKTWDAINBIMPD-MCVCZSGFSA-N	CC1(C)C2CCC(CO[C@@H]3O[C@H](CO[C@@H]4OC[C@](O)(CO)[C@H]4O)[C@@H](O)[C@H](O)[C@H]3O)C1C2	Lipids and lipid-like molecules	Prenol lipids	Terpene glycosides		0.781	101816
NEG_4004	8.515	329.241	(Z)-5,8,11-Trihydroxyoctadec-9-enoic acid	[M-H]-	C18H34O5	FITAKYVPWCVTII-QBFSEMIESA-N	CCCCCCCC(O)C=CC(O)CCC(O)CCCC(O)=O	Lipids and lipid-like molecules	Fatty Acyls	Fatty acids and conjugates		0.809	706811
NEG_9699	4.905	563.154	[(2R,3S,4S,5R,6S)-6-[4-[(E)-3-(2,4-Dihydroxyphenyl)-3-oxoprop-1-enyl]phenoxy]-3,4,5-trihydroxyoxan-2-yl]methyl (E)-3-(4-hydroxyphenyl)prop-2-enoate	[M-H]-	C30H28O11	FCYCVETXTGWXBR-CMUGPJGNSA-N	OC1C(O)C(COC(=O)C=CC2=CC=C(O)C=C2)OC(OC3=CC=C(C=CC(=O)C4=CC=C(O)C=C4O)C=C3)C1O	Phenylpropanoids and polyketides	Flavonoids	Flavonoid glycosides		0.775	11506946
NEG_3934	3.447	327.116	1-(4-Hydroxyphenyl)-3-[(2R,3R,4S,5S,6R)-3,4,5-trihydroxy-6-(hydroxymethyl)oxan-2-yl]oxypropan-1-one	[M-H]-	C15H20O8	NPAQHLFPEOMKAL-UXXRCYHCSA-N	OCC1OC(OCCC(=O)C2=CC=C(O)C=C2)C(O)C(O)C1O	Lipids and lipid-like molecules	Fatty Acyls	Fatty acyl glycosides		0.717	3220546
NEG_13652	7.276	809.426	1-O-[(3beta,5xi,9xi,18xi)-3-(beta-D-Glucopyranuronosyloxy)-23-hydroxy-28-oxoolean-12-en-28-yl]-beta-D-glucopyranose	[M-H]-	C42H66O15	RZQHWSDMLZHIRN-MCTPBCADSA-N	CC1(C)CCC2(CCC3(C)C(=CCC4C5(C)CCC(OC6OC(C(O)C(O)C6O)C(O)=O)C(C)(CO)C5CCC34C)C2C1)C(=O)OC7OC(CO)C(O)C(O)C7O	Lipids and lipid-like molecules	Prenol lipids	Terpene glycosides		0.749	32017
NEG_11625	6.956	663.363	1-O-[(3beta,5xi,9xi,18xi)-3,19,24-trihydroxy-24,28-dioxours-12-en-28-yl]-hexopyranose	[M-H]-	C36H56O11	AWFZJSUJFSUBQU-FZEZCDDVSA-N	CC1CCC2(CCC3(C)C(=CCC4C5(C)CCC(O)C(C)(C5CCC34C)C(O)=O)C2C1(C)O)C(=O)OC6OC(CO)C(O)C(O)C6O	Lipids and lipid-like molecules	Prenol lipids	Terpene glycosides		0.729	25882
NEG_8570	6.804	515.128	1,3-Dicaffeoylquinic acid	[M-H]-	C25H24O12	YDDUMTOHNYZQPO-GCBRTHAASA-N	C1[C@H]([C@@H]([C@@H](C[C@]1(C(=O)O)OC(=O)C=CC2=CC(=C(C=C2)O)O)OC(=O)C=CC3=CC(=C(C=C3)O)O)O)O					0.771	193281
NEG_4170	3.535	337.1	1,3,4-Trihydroxy-5-[[3-(4-hydroxyphenyl)-1-oxo-2-propenyl]oxy]-,(1r,3r,4s,5r)-cyclohexanecarboxylic acid	[M-H]-	C16H18O8	BMRSEYFENKXDIS-UHFFFAOYSA-N	OC1CC(O)(CC(OC(=O)C=CC2=CC=C(O)C=C2)C1O)C(O)=O	Organic oxygen compounds	Organooxygen compounds	Alcohols and polyols		0.76	2304858
NEG_5436	4.037	387.171	12:4+3O Fatty acyl hexoside	[M-H]-	C18H28O9	JFDNMLUPLXZXGV-UHFFFAOYSA-N	OCC1OC(OCCC=CCC2C(CCC2=O)CC(O)=O)C(O)C(O)C1O	Lipids and lipid-like molecules	Fatty Acyls	Fatty acyl glycosides		0.74	269697
NEG_3114	10.354	293.218	13-HoTrE	[M-H]1-	C18H30O3	KLLGGGQNRTVBSU-JDTPQGGVSA-N	CC\\C=C/CC(O)\\C=C\\C=C/CCCCCCCC(O)=O	Lipids and lipid-like molecules	Fatty Acyls	Lineolic acids and derivatives		0.778	13521963
NEG_8053	4.971	493.107	2-(3,4-Dihydroxyphenyl)-5,7-dihydroxy-8-[(3R,4R,5R,6R)-3,4,5-trihydroxy-6-(hydroxymethyl)oxan-2-YL]chromen-4-one	[M+FA-H]-	C21H20O11	PLAPMLGJVGLZOV-RKNSFIPESA-N	OC[C@H]1OC([C@H](O)[C@@H](O)[C@H]1O)C2=C3OC(=CC(=O)C3=C(O)C=C2O)C4=CC(=C(O)C=C4)O	Phenylpropanoids and polyketides	Flavonoids	Flavonoid glycosides		0.783	89850
NEG_252	4.403	124.019	2-Ammonioethanesulfonate	[M-H]-	C2H7NO3S	XOAAWQZATWQOTB-UHFFFAOYSA-N	NCC[S](O)(=O)=O	Organic acids and derivatives	Organic sulfonic acids and derivatives	Organosulfonic acids and derivatives		0.711	24290
NEG_3518	10.365	309.182	2-Dodecoxyethyl hydrogen sulfate	[M-H]-	C14H30O5S	QTDIEDOANJISNP-UHFFFAOYSA-N	CCCCCCCCCCCCOCCO[S](O)(=O)=O	Organic acids and derivatives	Organic sulfuric acids and derivatives	Sulfuric acid esters		0.793	1506165
NEG_4648	13.135	355.33	2-Hydroxydocosanoic acid	[M-H]-	C22H44O3	RPGJJWLCCOPDAZ-UHFFFAOYSA-N	O=C(O)C(O)CCCCCCCCCCCCCCCCCCCC	Lipids and lipid-like molecules	Fatty Acyls	Fatty acids and conjugates		0.74	63584
NEG_795	2.458	175.065	2-Isopropylmalic acid	[M-H]-	C7H12O5	BITYXLXUCSKTJS-UHFFFAOYSA-N	CC(C)C(O)(CC(O)=O)C(O)=O	Lipids and lipid-like molecules	Fatty Acyls	Fatty acids and conjugates		0.818	889204
NEG_514	5.722	153.023	2,3-Dihydroxybenzoic acid	[M-H]-	C7H6O4	GLDQAMYCGOIJDV-UHFFFAOYSA-N	OC(=O)C1=C(O)C(=CC=C1)O	Benzenoids	Benzene and substituted derivatives	Benzoic acids and derivatives	C00196	0.876	33356
NEG_8033	7.51	491.298	2'-Deoxyinosine triphosphate	[M-H]-	C10H15N4O13P3	UFJPAQSLHAGEBL-RRKCRQDMSA-N	OC1CC(OC1CO[P](O)(=O)O[P](O)(=O)O[P](O)(O)=O)[N]2C=NC3=C2NC=NC3=O	Nucleosides, nucleotides, and analogues	Purine nucleotides	Purine deoxyribonucleotides		0.72	59584
NEG_10644	5.036	609.157	2''-O-??-L-Galactopyranosylorientin	[M-H]-	C27H30O16	QQBFHNKJGBCSLG-VLCXRPQYSA-N	C1=CC(=C(C=C1C2=CC(=O)C3=C(O2)C(=C(C=C3O)O)[C@H]4C([C@H]([C@@H](C(O4)CO)O)O)O[C@@H]5[C@H](C([C@H](C(O5)CO)O)O)O)O)O					0.797	448897
NEG_611	3.069	163.042	3-(3-Hydroxy-phenyl)-acrylic acid	[M-H]-	C9H8O3	KKSDGJDHHZEWEP-UHFFFAOYSA-N	OC(=O)C=CC1=CC=CC(=C1)O	Phenylpropanoids and polyketides	Cinnamic acids and derivatives	Hydroxycinnamic acids and derivatives		0.808	22107
NEG_1075	8.377	193.056	3-(4-Hydroxy-3-methoxyphenyl)-2-propenoic acid	[M-H]-	C10H10O4	KSEBMYQBYZTDHS-UHFFFAOYSA-N	COC1=C(O)C=CC(=C1)C=CC(O)=O	Phenylpropanoids and polyketides	Cinnamic acids and derivatives	Hydroxycinnamic acids and derivatives		0.724	37863
NEG_7404	3.079	465.131	3-[(2S,3R,4S,5S,6R)-6-[[(2R,3R,4R)-3,4-dihydroxy-4-(hydroxymethyl)oxolan-2-yl]oxymethyl]-3,4,5-trihydroxyoxan-2-yl]oxy-2-methylpyran-4-one	[M+FA-H]-	C17H24O12	OXNYNKGAOAFFBD-AHZIVMAWSA-N	CC1=C(OC2OC(COC3OCC(O)(CO)C3O)C(O)C(O)C2O)C(=O)C=CO1	Organic oxygen compounds	Organooxygen compounds	Carbohydrates and carbohydrate conjugates		0.779	244796
NEG_4571	3.654	353.096	3-Caffeoylquinic acid	[M-H]-	C16H18O9	CWVRJTMFETXNAD-KWXNVWGOSA-N	O[C@@H]1C[C@@](O)(C[C@@H](OC(=O)\\C=C\\C2=CC=C(O)C(=C2)O)[C@H]1O)C(O)=O	Organic oxygen compounds	Organooxygen compounds	Alcohols and polyols		0.849	6359284
NEG_1441	5.089	217.113	3-Hydroxysebacic acid	[M-H]-	C10H18O5	OQYZCCKCJQWHIE-UHFFFAOYSA-N	OC(CCCCCCC(O)=O)CC(O)=O	Organic acids and derivatives	Hydroxy acids and derivatives	Medium-chain hydroxy acids and derivatives		0.709	37347
NEG_1000	3.851	189.082	3-Hydroxysuberic acid	[M-H]-	C8H14O5	ARJZZFJXSNJKGR-UHFFFAOYSA-N	OC(CCCCC(O)=O)CC(O)=O	Organic acids and derivatives	Hydroxy acids and derivatives	Medium-chain hydroxy acids and derivatives		0.795	37422
NEG_1864	10.541	243.201	3-Hydroxytetradecanoic acid	[M-H]-	C14H28O3	ATRNZOYKSNPPBF-UHFFFAOYSA-N	CCCCCCCCCCCC(O)CC(O)=O	Lipids and lipid-like molecules	Fatty Acyls	Fatty acids and conjugates		0.784	53100
NEG_4919	4.448	367.109	3-O-Feruloylquinic acid	[M-H]-	C17H20O9	RAGZUCNPTLULOL-KJJWLSQTSA-N	COC1=CC(=CC=C1O)C=CC(=O)OC2CC(O)(CC(O)C2O)C(O)=O	Organic oxygen compounds	Organooxygen compounds	Alcohols and polyols	C02572	0.787	785686
NEG_4165	3.069	337.097	3-p-Coumaroylquinic acid	[M-H]-	C16H18O8	BMRSEYFENKXDIS-QHAYPTCMSA-N	OC1CC(O)(CC(OC(=O)C=CC2=CC=C(O)C=C2)C1O)C(O)=O	Organic oxygen compounds	Organooxygen compounds	Alcohols and polyols	C12208	0.797	109049
NEG_386	3.426	137.028	3,4-Dihydroxybenzaldehyde	[M-H]-	C7H6O3	IBGBGRVKPALMCQ-UHFFFAOYSA-N	OC1=CC=C(C=O)C=C1O	Organic oxygen compounds	Organooxygen compounds	Carbonyl compounds	C16700	0.869	1316925
NEG_515	2.041	153.023	3,4-Dihydroxybenzoic acid	[M-H]-	C7H6O4	YQUVCSBJEUQKSH-UHFFFAOYSA-N	OC(=O)C1=CC=C(O)C(=C1)O	Benzenoids	Benzene and substituted derivatives	Benzoic acids and derivatives	C00230	0.87	612657
NEG_8157	0.872	497.173	3,5-Dihydroxy-4-[3,4,5-trihydroxy-6-[[4-(2-hydroxypropan-2-yl)cyclohexene-1-carbonyl]oxymethyl]oxan-2-yl]oxybenzoic acid	[M-H]-	C23H30O12	PEERGVFNQUXNQA-UHFFFAOYSA-N	CC(C)(O)C1CCC(=CC1)C(=O)OCC2OC(OC3=C(O)C=C(C=C3O)C(O)=O)C(O)C(O)C2O	Lipids and lipid-like molecules	Saccharolipids			0.701	10132
NEG_3220	10.02	297.158	4-(Decan-4-yl)benzenesulfonic acid	[M-H]-	C16H26O3S	NANHIUZYPFDGJS-UHFFFAOYSA-N	CCCCCCC(CCC)C1=CC=C(C=C1)[S](O)(=O)=O	Benzenoids	Benzene and substituted derivatives	Benzenesulfonic acids and derivatives		0.793	190003
NEG_229	3.188	121.032	4-Hydroxybenzaldehyde	[M-H]-	C7H6O2	RGHHSNMVTDWUBI-UHFFFAOYSA-N	OC1=CC=C(C=O)C=C1	Organic oxygen compounds	Organooxygen compounds	Carbonyl compounds	C00633	0.796	16808
NEG_495	4.425	151.043	4-Hydroxyphenyl acetate	[M-H]-	C8H8O3	HBMCQTHGYMTCOF-UHFFFAOYSA-N	CC(=O)OC1=CC=C(O)C=C1	Benzenoids	Phenol esters		C13636	0.707	52136
NEG_427	3.199	144.048	4-Hydroxyquinoline	[M-H]-	C9H7NO	PMZDQRJGMBOQBF-UHFFFAOYSA-N	O=C1C=CNC2=C1C=CC=C2	Organoheterocyclic compounds	Quinolines and derivatives	Quinolones and derivatives		0.856	27298
NEG_401	5.322	138.023	4-Nitrophenol	[M-H]-	C6H5NO3	BTJIUGUIPKRLHP-UHFFFAOYSA-N	OC1=CC=C(C=C1)[N](=O)=O	Benzenoids	Phenols	Nitrophenols	C00870	0.852	64619
NEG_4923	3.469	367.111	5-O-Feruloylquinic acid	[M-H]-	C17H20O9	RAGZUCNPTLULOL-UHFFFAOYSA-N	COC1=C(O)C=CC(=C1)C=CC(=O)OC2CC(O)(CC(O)C2O)C(O)=O	Organic oxygen compounds	Organooxygen compounds	Alcohols and polyols		0.799	304858
NEG_13807	5.904	825.419	6-O-beta-D-Glucopyranosyl-1-O-[(3beta,5xi,9xi)-3,19,24-trihydroxy-24,28-dioxours-12-en-28-yl]-beta-D-glucopyranose	[M-H]-	C42H66O16	LCQFYEBJTAIMPC-PVSIORMYSA-N	CC1CCC2(CCC3(C)C(=CCC4C5(C)CCC(O)C(C)(C5CCC34C)C(O)=O)C2C1(C)O)C(=O)OC6OC(COC7OC(CO)C(O)C(O)C7O)C(O)C(O)C6O	Lipids and lipid-like molecules	Prenol lipids	Terpene glycosides		0.753	4313
NEG_1615	6.541	229.092	7-Demethylsuberosin	[M-H]-	C14H14O3	FIDUIAPDSKSUGO-UHFFFAOYSA-N	CC(=CCC1=C(C=C2C(=C1)C=CC(=O)O2)O)C					0.781	82290
NEG_2246	5.57	261.138	9-(2,3-Dihydroxypropoxy)-9-oxononanoic acid	[M-H]-	C12H22O6	BQRISQXLSXCXSC-UHFFFAOYSA-N	OCC(O)COC(=O)CCCCCCCC(O)=O	Lipids and lipid-like molecules	Fatty Acyls	Fatty acids and conjugates		0.789	21675
NEG_2074	11.858	253.223	9-Hexadecenoic acid	[M-H]-	C16H30O2	SECPZKHBENQXJG-BQYQJAHWSA-N	CCCCCC\\C=C\\CCCCCCCC(O)=O	Lipids and lipid-like molecules	Fatty Acyls	Fatty acids and conjugates		0.817	2038943
NEG_3116	9.988	293.218	9-HOTrE	[M-H]1-	C18H30O3	RIGGEAZDTKMXSI-CUHSZNQNSA-N	CC\\C=C/C/C=C\\C=C\\C(O)CCCCCCCC(O)=O	Lipids and lipid-like molecules	Fatty Acyls	Lineolic acids and derivatives		0.707	22551728
NEG_3525	8.458	309.214	9-Hydroperoxy-, (Z,Z,Z)-10,12,15-octadecatrienoic acid	[M-H]-	C18H30O4	RWKJTIHNYSIIHW-UHFFFAOYSA-N	CCC=CCC=CC=CC(CCCCCCCC(O)=O)OO	Lipids and lipid-like molecules	Fatty Acyls	Lineolic acids and derivatives		0.717	601154
NEG_3585	8.81	311.231	9-Hydroperoxyoctadeca-10,12-dienoic acid	[M-H]-	C18H32O4	JGUNZIWGNMQSBM-UHFFFAOYSA-N	CCCCCC=CC=CC(CCCCCCCC(O)=O)OO	Lipids and lipid-like molecules	Fatty Acyls	Lineolic acids and derivatives		0.704	329418
NEG_3165	10.375	295.235	9-Hydroxy-10E,12Z-octadecadienoic acid	[M-H]1-	C18H32O3	NPDSHTNEKLQQIJ-ZJHFMPGASA-N	CCCCC\\C=C/C=C/C(O)CCCCCCCC(O)=O	Lipids and lipid-like molecules	Fatty Acyls	Lineolic acids and derivatives		0.821	38097056
NEG_3115	11.687	293.218	9-KODE	[M-H]-	C18H30O3	LUZSWWYKKLTDHU-SIGMCMEVSA-N	CCCCC/C=C/C=C/C(=O)CCCCCCCC(=O)O					0.711	729005
NEG_3524	10.354	309.209	9-Oxo-11-(3-pentyloxiran-2-YL)undec-10-enoic acid	[M-H]-	C18H30O4	RCMABBHQYMBYKV-UHFFFAOYSA-N	CCCCCC1OC1C=CC(=O)CCCCCCCC(O)=O	Lipids and lipid-like molecules	Fatty Acyls	Fatty acids and conjugates		0.786	295236
NEG_3227	10.79	297.25	9,10-Epoxystearic acid	[M-H]-	C18H34O3	IMYZYCNQZDBZBQ-UHFFFAOYSA-N	CCCCCCCCC1OC1CCCCCCCC(O)=O	Lipids and lipid-like molecules	Fatty Acyls	Lineolic acids and derivatives	C19620	0.862	1122901
NEG_2681	11.467	279.242	9,11-Octadecadienoic acid	[M-H]-	C18H32O2	JBYXPOFIGCOSSB-XBLVEGMJSA-N	CCCCCC\\C=C\\C=C\\CCCCCCCC(O)=O	Lipids and lipid-like molecules	Fatty Acyls	Lineolic acids and derivatives	C04056	0.762	771134
NEG_3340	11.631	301.224	Abietic acid	[M-H]-	C20H30O2	RSWGJHLUYNHPMX-ONCXSQPRSA-N	CC(C)C1=CC2=CCC3C(C)(CCCC3(C)C(O)=O)C2CC1	Lipids and lipid-like molecules	Prenol lipids	Diterpenoids	C06087	0.709	95133
NEG_753	4.114	172.101	Acetylleucine	[M-H]-	C8H15NO3	WXNXCEHXYPACJF-UHFFFAOYSA-N	CC(C)CC(NC(C)=O)C(O)=O	Organic acids and derivatives	Carboxylic acids and derivatives	Amino acids, peptides, and analogues		0.795	14522
NEG_346	1.201	134.049	Adenine	[M-H]-	C5H5N5	GFFGJBXGBJISGV-UHFFFAOYSA-N	NC1=C2N=CN=C2[NH]C=N1	Organoheterocyclic compounds	Imidazopyrimidines	Purines and purine derivatives	C00147	0.914	39037
NEG_2357	2.779	266.096	Adenosine	[M-H]-	C10H13N5O4	OIRDTQYFTABQOQ-KQYNXXCUSA-N	NC1=NC=NC2=C1N=C[N]2C3OC(CO)C(O)C3O	Nucleosides, nucleotides, and analogues	Purine nucleosides		C00212	0.764	104457
NEG_12989	10.937	749.452	alpha-Hederin	[M-H]-	C41H66O12	KEOITPILCOILGM-UHFFFAOYNA-N	O=C(O)C12CCC(C)(C)CC2C3=CCC4C5(C)CCC(OC6OCC(O)C(O)C6OC7OC(C)C(O)C(O)C7O)C(C)(CO)C5CCC4(C)C3(C)CC1					0.777	8554
NEG_2408	7.099	269.05	Apigenin	[M-H]-	C15H10O5	KZNIFHPLKGYRTM-UHFFFAOYSA-N	OC1=CC=C(C=C1)C2=CC(=O)C3=C(O2)C=C(O)C=C3O	Phenylpropanoids and polyketides	Flavonoids	Flavones	C01477	0.847	51181
NEG_12854	4.381	739.221	Apigenin 7-O-(2G-rhamnosyl)gentiobioside	[M-H]-	C33H40O19	LXOPDILLGIDKLW-UHFFFAOYSA-N	CC1C(C(C(C(O1)OC2C(C(C(OC2OC3=CC(=C4C(=C3)OC(=CC4=O)C5=CC=C(C=C5)O)O)COC6C(C(C(C(O6)CO)O)O)O)O)O)O)O)O					0.766	73821
NEG_7773	2.983	481.108	Apigenin-6-C-arabinoside-8-C-glucoside	[M-H]-	C25H22O10	SEBFKMXJBCUCAI-WAABAYLZSA-N	COC1=CC(=CC=C1O)C2OC3=CC(=CC=C3OC2CO)C4OC5=C(C(=CC(=C5)O)O)C(=O)C4O	Lignans, neolignans and related compounds	Flavonolignans			0.723	43077
NEG_14837	13.252	957.516	Asiaticoside	[M-H]-	C48H78O19	WYQVAPGDARQUBT-UHFFFAOYNA-N	O=C(OC1OC(COC2OC(CO)C(OC3OC(C)C(O)C(O)C3O)C(O)C2O)C(O)C(O)C1O)C45CCC(C)C(C)C5C6=CCC7C8(C)CC(O)C(O)C(C)(CO)C8CCC7(C)C6(C)CC4					0.751	26662
NEG_3656	1.136	315.078	Benzoic acid + 2O, O-Hex	[M-H]-	C13H16O9	CBTFERBMQQAROP-UHFFFAOYSA-N	OCC1OC(OC2=CC=C(O)C(=C2)C(O)=O)C(O)C(O)C1O	Organic oxygen compounds	Organooxygen compounds	Carbohydrates and carbohydrate conjugates		0.823	301738
NEG_1207	5.133	201.024	Bergaptol	[M-H]-	C11H6O4	GIJHDGJRTUSBJR-UHFFFAOYSA-N	OC1=C2C=CC(=O)OC2=CC3=C1C=CO3	Phenylpropanoids and polyketides	Coumarins and derivatives	Furanocoumarins	C00758	0.739	8962
NEG_4430	7.592	347.193	Bexarotene	[M-H]-	C24H28O2	NAVMQTYZDKMPEU-UHFFFAOYSA-N	CC1=CC2=C(C=C1C(=C)C3=CC=C(C=C3)C(O)=O)C(C)(C)CCC2(C)C	Lipids and lipid-like molecules	Prenol lipids	Retinoids		0.711	17216
NEG_839	2.973	179.037	Caffeic acid	[M-H]-	C9H8O4	QAIPRVGONGVQAS-DUXPYHPUSA-N	OC(=O)C=CC1=CC=C(O)C(=C1)O	Phenylpropanoids and polyketides	Cinnamic acids and derivatives	Hydroxycinnamic acids and derivatives	C01481	0.879	344169
NEG_842	3.762	179.039	Caffeic acid	[M-H]-	C9H8O4	QAIPRVGONGVQAS-UHFFFAOYSA-N	OC(=O)C=CC1=CC(=C(O)C=C1)O	Phenylpropanoids and polyketides	Cinnamic acids and derivatives	Hydroxycinnamic acids and derivatives		0.86	673761
NEG_4261	3.557	341.095	Caffeic acid hexoside	[M-H]-	C15H18O9	WQSDYZZEIBAPIN-UHFFFAOYSA-N	OCC1OC(OC(=O)C=CC2=CC(=C(O)C=C2)O)C(O)C(O)C1O	Phenylpropanoids and polyketides	Cinnamic acids and derivatives	Hydroxycinnamic acids and derivatives		0.731	155890
NEG_1453	2.543	218.109	Calcium pantothenate	[M-H]-	C9H17NO5.1/2 Ca	FAPWYRCQGJNNSJ-UBKPKTQASA-L	CC(C)(CO)[C@H](C(=O)NCCC(=O)[O-])O.CC(C)(CO)[C@H](C(=O)NCCC(=O)[O-])O.[Ca+2]					0.83	386057
NEG_4229	12.064	339.193	Canrenone	[M-H]-	C22H28O3	UJVLDDZCTMKXJK-AFDHUMPMSA-N	CC12CCC(=O)C=C1C=CC3[C@@H]2CCC4(C)[C@H]3CCC45CCC(=O)O5	Lipids and lipid-like molecules	Steroids and steroid derivatives	Steroid lactones		0.815	138024
NEG_125	2.041	109.032	Catechol	[M-H]-	C6H6O2	YCIMNLLNPGFGHC-UHFFFAOYSA-N	OC1=C(O)C=CC=C1	Benzenoids	Phenols	Benzenediols	C15571	0.734	309902
NEG_4574	5.445	353.096	Chlorogenic acid	[M-H]-	C16H18O9	CWVRJTMFETXNAD-JUHZACGLSA-N	OC1CC(O)(CC(OC(=O)C=CC2=CC=C(O)C(=C2)O)C1O)C(O)=O	Organic oxygen compounds	Organooxygen compounds	Alcohols and polyols	C00852	0.801	2778543
NEG_465	3.578	147.05	Cinnamic acid	[M-H]-	C9H8O2	WBYWAXJHAXSJNI-VOTSOKGWSA-N	OC(=O)C=CC1=CC=CC=C1	Phenylpropanoids and polyketides	Cinnamic acids and derivatives	Cinnamic acids	C10438	0.805	1955370
NEG_3951	7.625	327.225	Corchorifatty acid F	[M-H]-	C18H32O5	MKYUCBXUUSZMQB-MKZMYESJSA-N	CCC=CCC(O)C(O)C=CC(O)CCCCCCCC(O)=O	Lipids and lipid-like molecules	Fatty Acyls	Lineolic acids and derivatives		0.839	9193872
NEG_9697	5.722	563.151	Corymboside	[M-H]-	C26H28O14	OVMFOVNOXASTPA-UHFFFAOYSA-N	OCC1OC(C(O)C(O)C1O)C2=C(O)C(=C(O)C3=C2OC(=CC3=O)C4=CC=C(O)C=C4)C5OCC(O)C(O)C5O	Phenylpropanoids and polyketides	Flavonoids	Flavonoid glycosides		0.702	863420
NEG_8582	2.952	515.15	Coumarin + 1O + 1MeO, O-Hex-Hex	[M-H]-	C22H28O14	QJGJAMWLRCWSIH-UHFFFAOYSA-N	COC1=CC2=C(OC(=O)C=C2)C=C1OC3OC(CO)C(O)C(O)C3OC4OC(CO)C(O)C(O)C4O	Phenylpropanoids and polyketides	Coumarins and derivatives	Coumarin glycosides		0.762	323942
NEG_4169	4.215	337.1	Coumaroyl quinic acid	[M-H]-	C16H18O8	XWRHBGVVCOSNKO-UHFFFAOYSA-N	OC1CC(O)(CC(O)C1OC(=O)C=CC2=CC=C(O)C=C2)C(O)=O	Organic oxygen compounds	Organooxygen compounds	Alcohols and polyols		0.826	4058437
NEG_2786	1.729	282.091	Crotonoside	[M-H]-	C10H13N5O5	MIKUYHXYGGJMLM-UUOKFMHZSA-N	NC1=C2N=C[N]([C@@H]3O[C@H](CO)[C@@H](O)[C@H]3O)C2=NC(=N1)O	Nucleosides, nucleotides, and analogues	Purine nucleosides			0.79	23905
NEG_4568	3.394	353.096	Cryptochlorogenic acid	[M-H]-	C16H18O9	GYFFKZTYYAFCTR-AVXJPILUSA-N	O[C@@H]1C[C@@](O)(C[C@@H](O)[C@H]1OC(=O)\\C=C\\C2=CC(=C(O)C=C2)O)C(O)=O	Organic oxygen compounds	Organooxygen compounds	Alcohols and polyols		0.895	7026140
NEG_13049	5.916	755.203	Cyanidin 3-(2G-glucosylrutinoside)	[M-2H]-	C33H41O20	MSUVUDCULKNUJL-UHFFFAOYNA-O	OC=1C=C(O)C=2C=C(OC3OC(COC4OC(C)C(O)C(O)C4O)C(O)C(O)C3OC5OC(CO)C(O)C(O)C5O)C(=[O+]C2C1)C=6C=CC(O)=C(O)C6					0.717	14575
NEG_347	1.383	134.049	Cyclic AMP	[M-H]-	C10H12N5O6P	IVOMOUWHDPKRLL-KQYNXXCUSA-N	NC1=NC=NC2=C1N=C[N]2C3OC4CO[P](O)(=O)OC4C3O	Nucleosides, nucleotides, and analogues	Purine nucleotides	Cyclic purine nucleotides	C00575	0.877	176425
NEG_854	0.653	179.06	D-Glucose	[M-H]-	C6H12O6	WQZGKKKJIJFFOK-GASJEMHNSA-N	OC[C@H]1OC(O)[C@H](O)[C@@H](O)[C@@H]1O	Organic oxygen compounds	Organooxygen compounds	Carbohydrates and carbohydrate conjugates	C00221	0.79	982411
NEG_811	2.973	177.022	Daphnetin	[M-H]-	C9H6O4	ATEFPOUAMCWAQS-UHFFFAOYSA-N	OC1=C(O)C2=C(C=CC(=O)O2)C=C1	Phenylpropanoids and polyketides	Coumarins and derivatives	Hydroxycoumarins	C03093	0.777	71014
NEG_3295	11.338	299.208	Dehydroabietic acid	[M-H]-		NFWKVWVWBFBAOV-UHFFFAOYSA-N	CC(C)C1=CC2=C(C=C1)C3(C)CCCC(C)(C3CC2)C(O)=O	Lipids and lipid-like molecules	Prenol lipids	Diterpenoids		0.781	126240
NEG_1725	9.988	235.175	Dihydroartemisinic acid	[M-H]-	C15H24O2	JYGAZEJXUVDYHI-DGTMBMJNSA-N	C[C@@H]1CC[C@H]([C@@H]2[C@H]1CCC(=C2)C)[C@@H](C)C(=O)O					0.749	290381
NEG_3932	4.336	327.113	Dihydrocoumaroyl Hexoside	[M-H]-	C15H20O8	FXEOLMWSBWXMSF-UHFFFAOYSA-N	OCC1OC(OC2=CC=CC=C2CCC(O)=O)C(O)C(O)C1O	Organic oxygen compounds	Organooxygen compounds	Carbohydrates and carbohydrate conjugates		0.708	106159
NEG_3882	10.881	325.192	Dihydroquinine	[M-H]-	C20H26N2O2	LJOQGZACKSYWCH-UHFFFAOYSA-N	CCC1CN2CCC1CC2C(O)C3=C4C=C(OC)C=CC4=NC=C3	Alkaloids and derivatives	Cinchona alkaloids			0.828	468239
NEG_3274	7.146	299.062	Diosmetin	[M-H]-	C16H12O6	MBNGWHIJMBWFHU-UHFFFAOYSA-N	COC1=C(O)C=C(C=C1)C2=CC(=O)C3=C(O2)C=C(O)C=C3O	Phenylpropanoids and polyketides	Flavonoids	O-methylated flavonoids	C10038	0.778	71473
NEG_12608	12.064	721.491	Dipalmitoylphosphatidylglycerol	[M-H]-	C38H75O10P	BIABMEZBCHDPBV-UHFFFAOYSA-N	CCCCCCCCCCCCCCCC(=O)OCC(CO[P](O)(=O)OCC(O)CO)OC(=O)CCCCCCCCCCCCCCC	Lipids and lipid-like molecules	Glycerophospholipids	Glycerophosphoglycerols		0.793	222741
NEG_5380	2.084	385.142	Disaccharides ((2Methyl-Hex)-Pen)	[M+HCOO]-	C13H24O10	HTULNBQKFKMRAH-UHFFFAOYSA-N	COCC1OC(OC2OCC(O)C(O)C2O)C(OC)C(O)C1O	Organic oxygen compounds	Organooxygen compounds	Carbohydrates and carbohydrate conjugates		0.736	140340
NEG_4241	14.115	339.335	Docosanoic acid	[M-H]-	C22H44O2	UKMSUNONTOPOIO-UHFFFAOYSA-N	CCCCCCCCCCCCCCCCCCCCCC(O)=O	Lipids and lipid-like molecules	Fatty Acyls	Fatty acids and conjugates	C08281	0.74	532236
NEG_9544	11.093	555.295	Dronedarone	[M-H]-	C31H44N2O5S	ZQTNQVWKHCQYLQ-UHFFFAOYSA-N	CCCCN(CCCC)CCCOC1=CC=C(C=C1)C(=O)C2=C(CCCC)OC3=C2C=C(N[S](C)(=O)=O)C=C3	Organic oxygen compounds	Organooxygen compounds	Carbonyl compounds		0.774	190703
NEG_810	4.037	177.022	Esculetin	[M-H]-	C9H6O4	ILEDWLMCKZNDJK-UHFFFAOYSA-N	OC1=CC2=C(C=CC(=O)O2)C=C1O	Phenylpropanoids and polyketides	Coumarins and derivatives	Hydroxycoumarins	C09263	0.923	578346
NEG_4211	3.458	339.079	Esculin	[M-H]-	C15H16O9	XHCADAYNFIFUHF-TVKJYDDYSA-N	OCC1OC(OC2=C(O)C=C3OC(=O)C=CC3=C2)C(O)C(O)C1O	Phenylpropanoids and polyketides	Coumarins and derivatives	Coumarin glycosides		0.835	572912
NEG_1489	5.881	221.087	Ethyl ferulate	[M-H]-	C12H14O4	ATJVZXXHKSYELS-FNORWQNLSA-N	CCOC(=O)/C=C/C1=CC(=C(C=C1)O)OC					0.708	24169
NEG_2471	11.385	271.235	FA 16:0;2O	[M-H]-	C16H32O3	JGHSBPIZNUXPLA-UHFFFAOYSA-N	O=C(O)C(O)CCCCCCCCCCCCCC	Lipids and lipid-like molecules	Fatty Acyls	Fatty acids and conjugates		0.727	1925846
NEG_1986	10.256	249.192	FA 16:3	[M-H]-	C16H26O2	KBGYPXOSNDMZRV-UHFFFAOYSA-N	O=C(O)CCCCCC=CCC=CCC=CCC	Lipids and lipid-like molecules	Fatty Acyls	Fatty acids and conjugates		0.765	129670
NEG_3687	10.177	315.26	FA 18:0;2O	[M-H]-	C18H36O4	VACHUYIREGFMSP-UHFFFAOYSA-N	O=C(O)CCCCCCCC(O)C(O)CCCCCCCC	Lipids and lipid-like molecules	Fatty Acyls	Fatty acids and conjugates		0.763	109709
NEG_3638	9.049	313.247	FA 18:1;2O	[M-H]-	C18H34O4	IPRLELFMTNDNMN-UHFFFAOYSA-N	O=C(O)CCCCCC(O)C=CC(O)CCCCCCCC	Lipids and lipid-like molecules	Fatty Acyls	Fatty acids and conjugates		0.789	183822
NEG_4001	7.064	329.239	FA 18:1;3O	[M-H]-	C18H34O5	LGADJSRSYLFTSG-UHFFFAOYSA-N	O=C(O)CCCC(O)CCC(O)C=CCC(O)CCCCCC	Lipids and lipid-like molecules	Fatty Acyls	Fatty acids and conjugates		0.762	54361
NEG_2553	9.977	275.209	FA 18:4	[M-H]-	C18H28O2	JIWBIWFOSCKQMA-UHFFFAOYSA-N	O=C(O)CCCCC=CCC=CCC=CCC=CCC	Lipids and lipid-like molecules	Fatty Acyls	Fatty acids and conjugates		0.745	1950361
NEG_3962	12.074	327.296	FA 20:0;2O	[M-H]-	C20H40O3	CPLYLXYEVLGWFJ-UHFFFAOYSA-N	O=C(O)C(O)CCCCCCCCCCCCCCCCCC	Lipids and lipid-like molecules	Fatty Acyls	Fatty acids and conjugates		0.768	995879
NEG_3475	12.644	307.273	FA 20:2	[M-H]-	C20H36O2	XSXIVVZCUAHUJO-UHFFFAOYSA-N	O=C(O)CCCCCCCCCC=CCC=CCCCCC	Lipids and lipid-like molecules	Fatty Acyls	Fatty acids and conjugates		0.763	1032068
NEG_3425	12.288	305.256	FA 20:3	[M-H]-	C20H34O2	AHANXAKGNAKFSK-UHFFFAOYSA-N	O=C(O)CCCCCCCCCC=CCC=CCC=CCC	Lipids and lipid-like molecules	Fatty Acyls	Fatty acids and conjugates		0.71	329389
NEG_4993	12.106	369.306	FA 22:1;2O	[M-H]-	C22H42O4	UBHSEJBILMDXFU-UHFFFAOYSA-N	O=C(O)CCCCCCCC(O)CCCC=CCCCCC(O)CCC	Lipids and lipid-like molecules	Fatty Acyls	Fatty acids and conjugates		0.896	144484
NEG_5346	13.637	383.359	FA 24:0;2O	[M-H]-	C24H48O3	MSUOLNSQHLHDAS-UHFFFAOYSA-N	O=C(O)C(O)CCCCCCCCCCCCCCCCCCCCCC	Lipids and lipid-like molecules	Fatty Acyls	Fatty acids and conjugates		0.832	26121
NEG_1064	4.828	193.054	Ferulic acid	[M-H]-	C10H10O4	KSEBMYQBYZTDHS-HWKANZROSA-N	COC1=CC(=CC=C1O)C=CC(O)=O	Phenylpropanoids and polyketides	Cinnamic acids and derivatives	Hydroxycinnamic acids and derivatives	C01494	0.834	78524
NEG_2741	3.567	281.071	Feruloyl Lactate	[M-H]-	C13H14O7	ZWAYKTOAUPIGML-HWKANZROSA-N	COC1=CC=C(\\C=C\\C(=O)OCC(O)C(O)=O)C=C1O	Phenylpropanoids and polyketides	Cinnamic acids and derivatives	Hydroxycinnamic acids and derivatives		0.741	32985
NEG_6996	5.845	449.115	Flavanomarein	[M-H]-	C21H22O11	DGGOLFCPSUVVHX-RTHJTPBESA-N	OCC1OC(OC2=C(O)C3=C(C=C2)C(=O)CC(O3)C4=CC(=C(O)C=C4)O)C(O)C(O)C1O	Phenylpropanoids and polyketides	Flavonoids	Flavonoid glycosides		0.721	42704
NEG_4969	4.114	369.09	Fraxin	[M-H]-	C16H18O10	CRSFLLTWRCYNNX-QBNNUVSCSA-N	COC1=CC2=C(OC(=O)C=C2)C(=C1O)OC3OC(CO)C(O)C(O)C3O	Phenylpropanoids and polyketides	Coumarins and derivatives	Coumarin glycosides		0.766	60161
NEG_1478	4.247	221.047	Fraxinol	[M-H]-	C11H10O5	PBPNOAHYDPHKFH-UHFFFAOYSA-N	COC1=C(C(=C2C=CC(=O)OC2=C1)OC)O					0.836	13245
NEG_702	1.008	169.017	Gallic acid	[M-H]-	C7H6O5	LNTHITQWFMADLM-UHFFFAOYSA-N	OC(=O)C1=CC(=C(O)C(=C1)O)O	Benzenoids	Benzene and substituted derivatives	Benzoic acids and derivatives	C01424	0.873	89580
NEG_2611	11.687	277.224	gamma-Linolenic acid	[M-H]-	C18H30O2	VZCCETWTMQHEPK-QNEBEIHSSA-N	CCCCCC=CCC=CCC=CCCCCC(O)=O	Lipids and lipid-like molecules	Fatty Acyls	Lineolic acids and derivatives	C06426	0.821	108830128
NEG_3103	8.331	293.182	Gingerol	[M-H]-	C17H26O4	NLDDIKRKFXEWBK-AWEZNQCLSA-N	CCCCC[C@H](O)CC(=O)CCC1=CC(=C(O)C=C1)OC	Benzenoids	Phenols	Methoxyphenols		0.823	1962815
NEG_4392	8.034	345.237	Ginkgolic Acid C15:1	[M-H]-	C22H34O3	YXHVCZZLWZYHSA-FPLPWBNLSA-N	CCCCCC/C=C\\CCCCCCCC1=C(C(=CC=C1)O)C(=O)O					0.703	97613
NEG_13860	12.703	829.497	Ginsenoside F2	[M+FA-H]-	C42H72O13	SWIROVJVGRGSPO-UHFFFAOYNA-N	OCC1OC(OC2CCC3(C)C(CCC4(C)C3CC(O)C5C(CCC54C)C(OC6OC(CO)C(O)C(O)C6O)(C)CCC=C(C)C)C2(C)C)C(O)C(O)C1O					0.71	28918
NEG_14748	14.261	945.559	Ginsenoside Re	[M-H]-	C48H82O18	PWAOOJDMFUQOKB-UHFFFAOYNA-N	OCC1OC(OC2CC3(C)C(CC(O)C4C(CCC43C)C(OC5OC(CO)C(O)C(O)C5O)(C)CCC=C(C)C)C6(C)CCC(O)C(C)(C)C26)C(OC7OC(C)C(O)C(O)C7O)C(O)C1O					0.703	25043
NEG_13400	13.309	783.493	Ginsenoside Rg2	[M-H]-	C42H72O13	AGBCLJAHARWNLA-UHFFFAOYNA-N	OCC1OC(OC2CC3(C)C(CC(O)C4C(CCC43C)C(O)(C)CCC=C(C)C)C5(C)CCC(O)C(C)(C)C25)C(OC6OC(C)C(O)C(O)C6O)C(O)C1O					0.727	5877
NEG_13401	13.762	783.497	Ginsenoside Rg3(R-FORM)	[M-H]-	C42H72O13	RWXIFXNRCLMQCD-UHFFFAOYNA-N	OCC1OC(OC2C(O)C(O)C(OC2OC3CCC4(C)C(CCC5(C)C4CC(O)C6C(CCC65C)C(O)(C)CCC=C(C)C)C3(C)C)CO)C(O)C(O)C1O					0.731	12805
NEG_13184	13.368	765.485	Ginsenoside Rg5	[M-H]-	C42H70O12	NJUXRKMKOFXMRX-UHFFFAOYNA-N	CC(=CC/C=C(\C)/[C@H]1CC[C@@]2([C@@H]1[C@@H](C[C@H]3[C@]2(CC[C@@H]4[C@@]3(CC[C@@H](C4(C)C)O[C@H]5[C@@H]([C@H]([C@@H]([C@H](O5)CO)O)O)O[C@H]6[C@@H]([C@H]([C@@H]([C@H](O6)CO)O)O)O)C)C)O)C)C					0.796	5563
NEG_14018	11.826	845.506	Ginsenoside-Rg1	[M+FA-H]-	C42H72O14	YURJSTAIMNSZAE-UHFFFAOYNA-N	OCC1OC(OC2CC3(C)C(CC(O)C4C(CCC43C)C(OC5OC(CO)C(O)C(O)C5O)(C)CCC=C(C)C)C6(C)CCC(O)C(C)(C)C26)C(O)C(O)C1O					0.729	14048
NEG_1100	0.631	195.054	Gluconic acid	[M-H]-	C6H12O7	RGHNJXZEOKUKBD-SQOUGZDYSA-N	OCC(O)C(O)C(O)C(O)C(O)=O	Organic acids and derivatives	Hydroxy acids and derivatives	Medium-chain hydroxy acids and derivatives	C00257	0.843	232769
NEG_2785	1.462	282.091	Guanosine	[M-H]-	C10H13N5O5	NYHBQMYGNKIUIF-UUOKFMHZSA-N	OCC1OC(C(O)C1O)[N]2C=NC3=C2NC(=N)N=C3O	Nucleosides, nucleotides, and analogues	Purine nucleosides			0.847	32519
NEG_3900	13.785	325.319	Heneicosanoic acid	[M-H]-	C21H42O2	CKDDRHZIAZRDBW-UHFFFAOYSA-N	CCCCCCCCCCCCCCCCCCCCC(O)=O	Lipids and lipid-like molecules	Fatty Acyls	Fatty acids and conjugates		0.792	234227
NEG_2435	12.68	269.255	Heptadecanoic acid	[M-H]-	C17H34O2	KEMQGTRYUADPNZ-UHFFFAOYSA-N	CCCCCCCCCCCCCCCCC(O)=O	Lipids and lipid-like molecules	Fatty Acyls	Fatty acids and conjugates		0.791	1720730
NEG_2902	10.052	285.211	Hexadecanedioic acid	[M-H]-	C16H30O4	QQHJDPROMQRDLA-UHFFFAOYSA-N	OC(=O)CCCCCCCCCCCCCCC(O)=O	Lipids and lipid-like molecules	Fatty Acyls	Fatty acids and conjugates	C19615	0.832	37738
NEG_988	5.94	187.103	Hydron;nonanedioate	[M-H]-	C9H16O4	BDJRBEYXGGNYIS-UHFFFAOYSA-N	OC(=O)CCCCCCCC(O)=O	Lipids and lipid-like molecules	Fatty Acyls	Fatty acids and conjugates		0.87	982272
NEG_3109	10.881	293.187	Hydron;tetradecyl sulfate	[M-H]-	C14H30O4S	URLJMZWTXZTZRR-UHFFFAOYSA-N	CCCCCCCCCCCCCCO[S](O)(=O)=O	Organic acids and derivatives	Organic sulfuric acids and derivatives	Sulfuric acid esters		0.788	4840721
NEG_3885	10.971	325.195	Hydroquinidine	[M-H]-	C20H26N2O2	LJOQGZACKSYWCH-LHHVKLHASA-N	CC[C@H]1CN2CC[C@H]1C[C@@H]2[C@@H](O)C3=C4C=C(OC)C=CC4=NC=C3	Alkaloids and derivatives	Cinchona alkaloids			0.836	593093
NEG_777	4.95	174.06	Indole-3-acetic acid	[M-H]-		SEOVTRFCIGRIMH-UHFFFAOYSA-N	OC(=O)CC1=C[NH]C2=C1C=CC=C2	Organoheterocyclic compounds	Indoles and derivatives	Indolyl carboxylic acids and derivatives	C00954	0.743	83197
NEG_585	5.322	160.044	Indole-3-carboxylic acid	[M-H]-	C9H7NO2	KMAKOBLIOCQGJP-UHFFFAOYSA-N	OC(=O)C1=C[NH]C2=C1C=CC=C2	Organoheterocyclic compounds	Indoles and derivatives	Indolecarboxylic acids and derivatives	C19837	0.764	20279
NEG_1479	4.015	221.049	Isofraxidin	[M-H]-	C11H10O5	HOEVRHHMDJKUMZ-UHFFFAOYSA-N	COC1=C(O)C(=C2OC(=O)C=CC2=C1)OC	Phenylpropanoids and polyketides	Coumarins and derivatives	Hydroxycoumarins		0.84	61983
NEG_7350	5.524	463.097	Isoquercitrin	[M-H]-	C21H20O12	OVSQVDMCBVZWGM-QSOFNFLRSA-N	OC[C@H]1O[C@@H](OC2=C(OC3=C(C(=CC(=C3)O)O)C2=O)C4=CC(=C(O)C=C4)O)[C@H](O)[C@@H](O)[C@@H]1O	Phenylpropanoids and polyketides	Flavonoids	Flavonoid glycosides	C05623	0.863	2263966
NEG_6541	5.39	431.107	Isovitexin	[M-H]-	C21H20O10	MYXNWGACZJSMBT-VJXVFPJBSA-N	OC[C@H]1O[C@H]([C@H](O)[C@@H](O)[C@@H]1O)C2=C(O)C3=C(OC(=CC3=O)C4=CC=C(O)C=C4)C=C2O	Phenylpropanoids and polyketides	Flavonoids	Flavonoid glycosides		0.844	5240512
NEG_10346	5.057	593.164	Kaempferol 3-glucorhamnoside	[M-H]-	C27H30O15	OHOBPOYHROOXEI-OVNVQJKQSA-N????	C[C@@H]1[C@H]([C@@H]([C@H]([C@@H](O1)O[C@@H]2[C@@H]([C@H]([C@@H](O[C@H]2OC3=C(OC4=CC(=CC(=C4C3=O)O)O)C5=CC=C(C=C5)O)CO)O)O)O)O)O					0.715	7623588
NEG_10664	8.331	609.351	Kaempferol 3,7-diglucoside	[M-H]-	C27H30O16	XFFQVRFGLSBFON-DEFKTLOSSA-N	OCC1OC(OC2=CC(=C3C(=O)C(=C(OC3=C2)C4=CC=C(O)C=C4)OC5OC(CO)C(O)C(O)C5O)O)C(O)C(O)C1O	Phenylpropanoids and polyketides	Flavonoids	Flavonoid glycosides		0.744	72098
NEG_993	3.199	188.041	Kynurenic acid	[M-H]-	C10H7NO3	HCZHHEIFKROPDY-UHFFFAOYSA-N	OC(=O)C1=CC(=O)C2=C(N1)C=CC=C2	Organoheterocyclic compounds	Quinolines and derivatives	Quinoline carboxylic acids	C01717	0.808	31938
NEG_660	3.948	165.059	L-(-)-3-Phenyllactic acid	[M-H]-	C9H10O3	VOXXWSYKYCBWHO-QMMMGPOBSA-N	O[C@@H](CC1=CC=CC=C1)C(O)=O	Phenylpropanoids and polyketides	Phenylpropanoic acids		C05607	0.894	1940624
NEG_331	0.642	133.018	L-Malic acid	[M-H]-	C4H6O5	BJEPYKJPYRNKOW-REOHCLBHSA-N	O[C@@H](CC(O)=O)C(O)=O	Organic acids and derivatives	Hydroxy acids and derivatives	Beta hydroxy acids and derivatives	C00149	0.855	619933
NEG_277	0.696	128.038	L-Pyroglutamic acid	[M-H]-	C5H7NO3	ODHCTXKNWHHXJC-VKHMYHEASA-N	OC(=O)C1CCC(=N1)O	Organic acids and derivatives	Carboxylic acids and derivatives	Amino acids, peptides, and analogues	C01879	0.833	238967
NEG_4268	0.674	341.116	Lactulose	[M-H]-	C12H22O11	JCQLYHFGKNRPGE-FCVZTGTOSA-N	OCC1OC(OC2C(CO)OC(O)(CO)C2O)C(O)C(O)C1O	Organic oxygen compounds	Organooxygen compounds	Carbohydrates and carbohydrate conjugates	C07064	0.901	10471828
NEG_2335	9.977	265.154	Lauryl sulfate	[M-H]-	C12H26O4S	MOTZDAYCYVMXPC-UHFFFAOYSA-N	CCCCCCCCCCCCO[S](O)(=O)=O	Organic acids and derivatives	Organic sulfuric acids and derivatives	Sulfuric acid esters		0.859	3946792
NEG_290	0.926	130.09	Leucine	[M-H]-	C6H13NO2	ROHFNLRQFUQHCH-YFKPBYRVSA-N	CC(C)CC(N)C(O)=O	Organic acids and derivatives	Carboxylic acids and derivatives	Amino acids, peptides, and analogues	C00123	0.839	70469
NEG_2680	12.064	279.242	Linoleic acid	[M-H]-	C18H32O2	OYHQOLUKZRVURQ-HZJYTTRNSA-N	CCCCCC=CCC=CCCCCCCCC(O)=O	Lipids and lipid-like molecules	Fatty Acyls	Lineolic acids and derivatives	C01595	0.803	168731568
NEG_2608	10.756	277.221	Linolenic acid	[M-H]-	C18H30O2	DTOSIQBPPRVQHS-PDBXOOCHSA-N	CC\\C=C/C/C=C\\C\\C=C/CCCCCCCC(O)=O	Lipids and lipid-like molecules	Fatty Acyls	Lineolic acids and derivatives	C06427	0.76	126224
NEG_7156	5.743	455.167	Lobaric Acid	[M-H]-	C25H28O8	JHEWMLHQNRHTQX-UHFFFAOYSA-N	CCCCCC1=C2OC3=CC(=CC(=C3C(=O)OC2=CC(=C1C(O)=O)O)C(=O)CCCC)OC	Phenylpropanoids and polyketides	Depsides and depsidones			0.705	93537
NEG_2409	7.796	269.05	Lucidin	[M-H]-		AMIDUPFSOUCLQB-UHFFFAOYSA-N	OCC1=C(O)C=C2C(=O)C3=CC=CC=C3C(=O)C2=C1O	Benzenoids	Anthracenes	Anthraquinones		0.763	22655
NEG_2879	6.661	285.048	Luteolin	[M-H]-	C15H10O6	IQPNAANSBPBGFQ-UHFFFAOYSA-N	OC1=CC(=C2C(=O)C=C(OC2=C1)C3=CC(=C(O)C=C3)O)O	Phenylpropanoids and polyketides	Flavonoids	Flavones	C01514	0.812	314798
NEG_10364	8.799	593.28	Luteolin 7-O-rutinoside	[M-H]-	C27H30O15	MGYBYJXAXUBTQF-FOBVWLSUSA-N	CC1OC(OCC2OC(OC3=CC(=C4C(=O)C=C(OC4=C3)C5=CC(=C(O)C=C5)O)O)C(O)C(O)C2O)C(O)C(O)C1O	Phenylpropanoids and polyketides	Flavonoids	Flavonoid glycosides		0.772	23516
NEG_10645	4.481	609.157	Luteolin-7,3'-di-O-gflucoside	[M-H]-	C27H30O16	BISZYPSIZGKOFA-IPOZFMEPSA-N	OC[C@H]1O[C@@H](OC2=CC(=C3C(=O)C=C(OC3=C2)C4=CC(=C(O)C=C4)O[C@@H]5O[C@H](CO)[C@@H](O)[C@H](O)[C@H]5O)O)[C@H](O)[C@@H](O)[C@@H]1O	Phenylpropanoids and polyketides	Flavonoids	Flavonoid glycosides		0.787	186774
NEG_8319	7.808	503.331	Madecassic acid	[M-H]-	C30H48O6	PRAUVHZJPXOEIF-UHFFFAOYSA-N	CC1CCC2(CCC3(C(=CCC4C3(CC(C5C4(CC(C(C5(C)CO)O)O)C)O)C)C2C1C)C)C(=O)O					0.704	57724
NEG_15158	9.255	1019.5	Madecassoside	[M+FA-H]-	C48H78O20	BNMGUJRJUUDLHW-UHFFFAOYNA-N	O=C(OC1OC(COC2OC(CO)C(OC3OC(C)C(O)C(O)C3O)C(O)C2O)C(O)C(O)C1O)C45CCC(C)C(C)C5C6=CCC7C8(C)CC(O)C(O)C(C)(CO)C8C(O)CC7(C)C6(C)CC4					0.738	5366
NEG_168	4.303	115.005	Maleic acid	[M-H]-	C4H4O4	VZCYOOQTPOCHFL-UPHRSURJSA-N	OC(=O)C=CC(O)=O	Organic acids and derivatives	Carboxylic acids and derivatives	Dicarboxylic acids and derivatives	C01384	0.734	35262
NEG_905	0.642	181.077	Mannitol	[M-H]-	C6H14O6	FBPFZTCFMRRESA-KVTDHHQDSA-N	OCC(O)C(O)C(O)C(O)CO	Organic oxygen compounds	Organooxygen compounds	Carbohydrates and carbohydrate conjugates	C00392	0.76	127393
NEG_8258	8.262	501.331	Medicagenic acid	[M-H]-	C30H46O6	IDGXIXSKISLYAC-WNTKNEGGSA-N	CC1(C)CC[C@@]2(CC[C@]3(C)C(=CC[C@@H]4[C@@]5(C)C[C@H](O)[C@H](O)[C@](C)([C@@H]5CC[C@@]34C)C(O)=O)[C@@H]2C1)C(O)=O	Lipids and lipid-like molecules	Prenol lipids	Triterpenoids		0.739	65289
NEG_597	0.861	161.049	Meglutol	[M-H]-	C6H10O5	NPOAOTPXWNWTSH-UHFFFAOYSA-N	CC(O)(CC(O)=O)CC(O)=O	Lipids and lipid-like molecules	Fatty Acyls	Fatty acids and conjugates	C03761	0.81	77246
NEG_8300	0.663	503.171	Melezitose	[M-H]-	C18H32O16	QWIZNVHXZXRPDR-WSCXOGSTSA-N	OCC1OC(OC2C(O)C(CO)OC2(CO)OC3OC(CO)C(O)C(O)C3O)C(O)C(O)C1O	Organic oxygen compounds	Organooxygen compounds	Carbohydrates and carbohydrate conjugates	C08243	0.791	666585
NEG_8573	4.114	515.131	Methyl (3R,4R,5R)-5-[(2R,3R,4S,5S,6R)-4,5-dihydroxy-6-(hydroxymethyl)-3-[(E)-3-phenylprop-2-enoyl]oxyoxan-2-yl]oxy-3,4-dihydroxycyclohexene-1-carboxylate	[M+Cl]-	C23H28O11	DWQNDLRNUNNJHX-NZNOAPCVSA-N	COC(=O)C1=CC(O)C(O)C(C1)OC2OC(CO)C(O)C(O)C2OC(=O)C=CC3=CC=CC=C3	Lipids and lipid-like molecules	Fatty Acyls	Fatty acyl glycosides		0.705	169378
NEG_3688	9.923	315.26	Methyl hexadecanoate	[M-H]-	C17H34O2	FLIACVVOZYBSBS-UHFFFAOYSA-N	CCCCCCCCCCCCCCCC(=O)OC					0.707	33035
NEG_818	5.869	177.06	Methyleugenol	[M-H]-	C11H14O2	ZYEMGPIYFIJGTP-UHFFFAOYSA-N	COC1=C(OC)C=C(CC=C)C=C1	Benzenoids	Benzene and substituted derivatives	Methoxybenzenes	C10454	0.721	22973
NEG_15181	10.386	1023.52	Microcystin LW	[M-H]-	C54H72N8O12	CJIASZBWXIFQMU-LNXRSHCCSA-N	CO[C@@H](CC1=CC=CC=C1)[C@@H](C)\\C=C(C)\\C=C\\[C@@H]2NC(=O)[C@H](CC3=C[NH]C4=C3C=CC=C4)NC(=O)[C@@H](C)[C@@H](NC(=O)[C@H](CC(C)C)NC(=O)[C@@H](C)NC(=O)C(=C)N(C)C(=O)CC[C@@H](NC(=O)[C@H]2C)C(O)=O)C(O)=O	Organic acids and derivatives	Peptidomimetics	Hybrid peptides		0.727	16435
NEG_1594	11.687	227.207	Myristic acid	[M-H]-	C14H28O2	TUNFSRHWOTWDNC-UHFFFAOYSA-N	CCCCCCCCCCCCCC(O)=O	Lipids and lipid-like molecules	Fatty Acyls	Fatty acids and conjugates	C06424	0.803	554097
NEG_1889	3.851	245.1	N-Acetyl-DL-tryptophan	[M-H]-	C13H14N2O3	DZTHIGRZJZPRDV-UHFFFAOYSA-N	CC(O)=NC(CC1=C[NH]C2=C1C=CC=C2)C(O)=O	Organic acids and derivatives	Carboxylic acids and derivatives	Amino acids, peptides, and analogues		0.791	305618
NEG_752	3.047	172.101	N-Acetyl-L-leucine	[M-H]-	C8H15NO3	WXNXCEHXYPACJF-ZETCQYMHSA-N	CC(C)CC(N=C(C)O)C(O)=O	Organic acids and derivatives	Carboxylic acids and derivatives	Amino acids, peptides, and analogues	C02710	0.796	81895
NEG_1282	3.372	206.086	N-Acetyl-L-phenylalanine	[M-H]-	C11H13NO3	CBQJSKKFNMDLON-JTQLQIEISA-N	CC(O)=NC(CC1=CC=CC=C1)C(O)=O	Organic acids and derivatives	Carboxylic acids and derivatives	Amino acids, peptides, and analogues	C03519	0.876	133996
NEG_3016	0.696	290.093	N-Fructosyl pyroglutamate	[M-H]-	C11H17NO8	VMOJEEZNLOLYBG-UHFFFAOYSA-N	OCC1OC(O)(CN2C(CCC2=O)C(O)=O)C(O)C1O					0.783	283851
NEG_4569	2.458	353.096	Neochlorogenic acid	[M-H]-		CWVRJTMFETXNAD-NXLLHMKUSA-N	O[C@@H]1C[C@@](O)(C[C@@H](OC(=O)\\C=C\\C2=CC(=C(O)C=C2)O)[C@H]1O)C(O)=O	Organic oxygen compounds	Organooxygen compounds	Alcohols and polyols	C17147	0.858	3731002
NEG_1021	6.04	191.04	Noreugenin	[M-H]-	C10H8O4	NCUJRUDLFCGVOE-UHFFFAOYSA-N	CC1=CC(=O)C2=C(C=C(C=C2O1)O)O					0.94	1779955
NEG_2765	11.89	281.255	Oleic acid	[M-H]-	C18H34O2	ZQPPMHVWECSIRJ-KTKRTIGZSA-N	CCCCCCCCC=CCCCCCCCC(O)=O	Lipids and lipid-like molecules	Fatty Acyls	Fatty acids and conjugates	C00712	0.769	111359
NEG_6944	4.993	447.101	Orientin	[M-H]-	C21H20O11	PLAPMLGJVGLZOV-YJQKKJGLSA-N	OCC1OC([C@H](O)[C@H](O)C1O)C2=C3OC(=CC(=O)C3=C(O)C=C2O)C4=CC(=C(O)C=C4)O	Phenylpropanoids and polyketides	Flavonoids	Flavonoid glycosides		0.92	30113438
NEG_454	5.177	147.048	p-Coumaraldehyde	[M-H]-	C9H8O2	CJXMVKYNVIGQBS-UHFFFAOYSA-N	OC1=CC=C(C=CC=O)C=C1	Phenylpropanoids and polyketides	Cinnamaldehydes			0.775	70667
NEG_2106	11.75	255.239	Palmitic acid	[M-H]-	C16H32O2	IPCSVZSSVZVIGE-UHFFFAOYSA-N	CCCCCCCCCCCCCCCC(O)=O	Lipids and lipid-like molecules	Fatty Acyls	Fatty acids and conjugates	C00249	0.784	1009749
NEG_10646	4.894	609.157	Panasenoside	[M-H]-	C27H30O16	LKZDFKLGDGSGEO-UHFFFAOYSA-N	OCC1OC(OC2C(O)C(O)C(CO)OC2OC3=C(OC4=C(C(=CC(=C4)O)O)C3=O)C5=CC=C(O)C=C5)C(O)C(O)C1O	Phenylpropanoids and polyketides	Flavonoids	Flavonoid glycosides		0.755	518478
NEG_558	0.795	157.125	Pelargonic acid	[M-H]-	C9H18O2	FBUKVWPVBMHYJY-UHFFFAOYSA-N	CCCCCCCCC(O)=O	Lipids and lipid-like molecules	Fatty Acyls	Fatty acids and conjugates	C01601	0.796	57445
NEG_1825	12.053	241.211	Pentadecanoic acid	[M-H]-	C15H30O2	WQEPLUUGTLDZJY-UHFFFAOYSA-N	CCCCCCCCCCCCCCC(O)=O	Lipids and lipid-like molecules	Fatty Acyls	Fatty acids and conjugates	C16537	0.812	87352
NEG_6407	4.392	425.171	Pentose-Hexose + C5H9	[M+HCOO]-	C16H28O10	NYSQQJIJJJAWCE-UHFFFAOYSA-N	CC(C)=CCOC1OC(COC2OCC(O)C(O)C2O)C(O)C(O)C1O	Lipids and lipid-like molecules	Fatty Acyls	Fatty acyl glycosides		0.752	218593
NEG_2768	12.475	281.257	Petroselinic acid	[M-H]-	C18H34O2	CNVZJPUDSLNTQU-SEYXRHQNSA-N	CCCCCCCCCCC\\C=C/CCCCC(O)=O	Lipids and lipid-like molecules	Fatty Acyls	Fatty acids and conjugates		0.798	24363548
NEG_2280	5.722	263.099	Peucedanol	[M-H]-	C14H16O5	WRTWKAQFZYXAEJ-GFCCVEGCSA-N	CC(C)([C@@H](CC1=C(C=C2C(=C1)C=CC(=O)O2)O)O)O					0.834	250290
NEG_2196	6.956	259.103	Peucenin	[M-H]-	C15H16O4	DTNGBIGBPPPNNB-UHFFFAOYSA-N	CC(C)=CCC1=C(O)C=C2OC(=CC(=O)C2=C1O)C	Organoheterocyclic compounds	Benzopyrans	1-benzopyrans		0.746	194379
NEG_12145	13.751	693.47	PG 30:0	[M-H]-	C36H71O10P	ZAXBYLHGBBMAAY-UHFFFAOYSA-N						0.811	103370
NEG_361	2.952	135.047	Phenylacetic acid	[M-H]-	C8H8O2	WLJVXDMOQOGPHL-UHFFFAOYSA-N	OC(=O)CC1=CC=CC=C1	Benzenoids	Benzene and substituted derivatives		C07086	0.703	87964
NEG_645	2.18	164.074	Phenylalanine	[M-H]-	C9H11NO2	COLNVLDHVKWLRT-QMMMGPOBSA-N	NC(CC1=CC=CC=C1)C(O)=O	Organic acids and derivatives	Carboxylic acids and derivatives	Amino acids, peptides, and analogues	C00079	0.822	322732
NEG_14042	12.953	847.519	PI 35:2	[M-H]-	C44H81O13P	AJAKJCJJRMUWFW-OHNCOSGTSA-N						0.706	52203
NEG_14094	6.398	855.489	PI 36:5	[M-H]-	C45H77O13P	FQGSWQFJOVVRRB-LPHKCNJWSA-N						0.711	19196
NEG_577	3.96	159.069	Pimelic acid	[M-H]-	C7H12O4	WLJVNTCWHIRURA-UHFFFAOYSA-N	OC(=O)CCCCCC(O)=O	Lipids and lipid-like molecules	Fatty Acyls	Fatty acids and conjugates	C02656	0.847	36333
NEG_11091	11.338	632.341	Pseudojervine	[M+FA-H]-	C33H49NO8	HYDDDNUKNMMWBD-UHFFFAOYNA-N	O=C1C2=C(C)C3(OC4CC(C)CNC4C3C)CCC2C5CC=C6CC(OC7OC(CO)C(O)C(O)C7O)CCC6(C)C15					0.711	5926
NEG_2083	0.795	255.03	Purpurin	[M-H]-	C14H8O5	BBNQQADTFFCFGB-UHFFFAOYSA-N	OC1=CC(=C2C(=O)C3=CC=CC=C3C(=O)C2=C1O)O	Benzenoids	Anthracenes	Anthraquinones		0.76	12481
NEG_7933	7.51	487.352	Pygenic acid b	[M-H]-	C30H48O5	JXSVIVRDWWRQRT-VULHWTOISA-N	C[C@@H]1CC[C@@]2(CC[C@]3(C)C(=CC[C@@H]4[C@@]5(C)CC(O)C(O)C(C)(CO)C5CC[C@@]34C)[C@@H]2[C@H]1C)C(O)=O	Lipids and lipid-like molecules	Prenol lipids	Triterpenoids		0.733	61906
NEG_156	2.458	113.063	Pyrrolidine-2-carboxamide	[M-H]-	C5H10N2O	VLJNHYLEOZPXFW-UHFFFAOYSA-N	NC(=O)C1CCCN1	Organic acids and derivatives	Carboxylic acids and derivatives	Amino acids, peptides, and analogues		0.723	19970
NEG_3319	6.481	301.041	Quercetin	[M-H]-	C15H10O7	REFJWTPEDVJJIY-UHFFFAOYSA-N	OC1=CC2=C(C(=C1)O)C(=O)C(=C(O2)C3=CC(=C(O)C=C3)O)O	Phenylpropanoids and polyketides	Flavonoids	Flavones	C00389	0.705	87261
NEG_7675	5.154	477.075	Quercetin 3-O-glucuronide	[M-H]-	C21H18O13	DUBCCGAQYVUYEU-ZUGPOPFOSA-N	O[C@@H]1[C@@H](O)[C@@H](O[C@@H]([C@H]1O)C(O)=O)OC2=C(OC3=C(C(=CC(=C3)O)O)C2=O)C4=CC(=C(O)C=C4)O	Phenylpropanoids and polyketides	Flavonoids	Flavonoid glycosides		0.781	76920
NEG_8340	5.445	505.108	Quercetin-3-O-glucosyl-6''-acetate	[M-H]-	C23H22O13	IGLUNMMNDNWZOA-UHFFFAOYNA-N	O=C(OCC1OC(OC=2C(=O)C=3C(O)=CC(O)=CC3OC2C=4C=CC(O)=C(O)C4)C(O)C(O)C1O)C					0.752	477310
NEG_10949	5.94	625.135	Quercetin-3,4'-O-di-beta-glucoside	[M-H]-	C27H30O17	RPVIQWDFJPYNJM-UHFFFAOYNA-N	O=C1C(OC2OC(CO)C(O)C(O)C2O)=C(OC=3C=C(O)C=C(O)C13)C=4C=CC(OC5OC(CO)C(O)C(O)C5O)=C(O)C4					0.778	131195
NEG_7879	8.112	485.337	Quillaic acid	[M-H]-	C30H46O5	MQUFAARYGOUYEV-UAWZMHPWSA-N	CC1(C)CC[C@@]2([C@H](O)C[C@]3(C)C(=CC[C@@H]4[C@@]5(C)CC[C@H](O)[C@@](C)(C=O)[C@@H]5CC[C@@]34C)[C@@H]2C1)C(O)=O	Lipids and lipid-like molecules	Prenol lipids	Triterpenoids	C08972	0.705	102507
NEG_1023	4.459	191.059	Quinic acid	[M-H]-	C7H12O6	AAWZDTNXLSGCEK-WYWMIBKRSA-N	C1[C@H](C([C@@H](CC1(C(=O)O)O)O)O)O					0.769	239409
NEG_1026	2.952	191.061	Quinic acid	[M-H]-	C7H12O6	AAWZDTNXLSGCEK-LNVDRNJUSA-N	OC1CC(O)(CC(O)C1O)C(O)=O	Organic oxygen compounds	Organooxygen compounds	Alcohols and polyols	C00296	0.945	16205406
NEG_9379	0.663	549.178	Raffinose	[M-H]-	C18H32O16	MUPFEKGTMRGPLJ-ZQSKZDJDSA-N	OCC1OC(OCC2OC(OC3(CO)OC(CO)C(O)C3O)C(O)C(O)C2O)C(O)C(O)C1O	Organic oxygen compounds	Organooxygen compounds	Carbohydrates and carbohydrate conjugates	C00492	0.794	744107
NEG_14619	7.064	925.501	Saikosaponin C	[M-H]-	C48H78O17	PYJMYPPFWASOJX-UHFFFAOYNA-N	OCC1OC(OCC2OC(OC3CCC4(C)C5C=CC6=C7CC(C)(C)CCC7(CO)C(O)CC6(C)C5(C)CCC4C3(C)C)C(O)C(O)C2OC8OC(C)C(O)C(O)C8O)C(O)C(O)C1O					0.734	16219
NEG_385	3.091	137.026	Salicylic acid	[M-H]-	C7H6O3	YGSDEFSMJLZEOE-UHFFFAOYSA-N	OC(=O)C1=C(O)C=CC=C1	Benzenoids	Benzene and substituted derivatives	Benzoic acids and derivatives	C00805	0.874	31880
NEG_10344	6.41	593.147	Saponarin	[M-H]-	C27H30O15	HGUVPEBGCAVWID-KETMJRJWSA-N	OC[C@H]1O[C@@H](OC2=C([C@@H]3O[C@H](CO)[C@@H](O)[C@H](O)[C@H]3O)C(=C4C(=O)C=C(OC4=C2)C5=CC=C(O)C=C5)O)[C@H](O)[C@@H](O)[C@@H]1O	Phenylpropanoids and polyketides	Flavonoids	Flavonoid glycosides		0.767	233744
NEG_5729	2.898	399.094	Scopolin	[M-H]-	C16H18O9	SGTCGCCQZOUMJJ-YMILTQATSA-N	COC1=CC2=C(OC(=O)C=C2)C=C1OC3OC(CO)C(O)C(O)C3O	Phenylpropanoids and polyketides	Coumarins and derivatives	Coumarin glycosides		0.778	11335
NEG_762	0.674	173.049	Shikimic acid	[M-H]-	C7H10O5	JXOHGGNKMLTUBP-HSUXUTPPSA-N	OC1CC(=CC(O)C1O)C(O)=O	Organic oxygen compounds	Organooxygen compounds	Alcohols and polyols	C00493	0.871	246586
NEG_14716	14.547	941.499	Soyasaponin Bb	[M-H]-	C48H78O18	PTDAHAWQAGSZDD-UHFFFAOYNA-N	O=C(O)C1OC(OC2CCC3(C)C(CCC4(C)C3CC=C5C6CC(C)(C)CC(O)C6(C)CCC54C)C2(C)CO)C(OC7OC(CO)C(O)C(O)C7OC8OC(C)C(O)C(O)C8O)C(O)C1O					0.75	34895
NEG_2844	12.964	283.273	Stearic acid	[M-H]-	C18H36O2	QIQXTHQIDYTFRH-UHFFFAOYSA-N	CCCCCCCCCCCCCCCCCC(O)=O	Lipids and lipid-like molecules	Fatty Acyls	Fatty acids and conjugates	C01530	0.762	9986596
NEG_199	0.85	117.022	Succinic acid	[M-H]-	C4H6O4	KDYFGRWQOYBRFD-UHFFFAOYSA-N	OC(=O)CCC(O)=O	Organic acids and derivatives	Carboxylic acids and derivatives	Dicarboxylic acids and derivatives		0.85	566916
NEG_2606	10.53	277.189	Tetradecane-7-sulfonic acid	[M-H]-	C14H30O3S	MZBFYGYTZIZFQC-UHFFFAOYSA-N	CCCCCCCC(CCCCCC)[S](O)(=O)=O	Organic acids and derivatives	Organic sulfonic acids and derivatives	Organosulfonic acids and derivatives		0.707	93470
NEG_5942	7.44	407.142	Tinnevellin glucoside	[M-H]-	C20H24O9	FEZDDTIDMGTSLT-CZNQJBLBSA-N	CC1=CC2=CC(=CC(=C2C(=C1C(=O)C)O)OC)O[C@H]3[C@@H]([C@H]([C@@H]([C@H](O3)CO)O)O)O					0.704	38080
NEG_4196	5.94	338.204	Toxin HT 2	[M-H]-	C22H32O8	PNKLMTPXERFKEN-UHFFFAOYSA-N	CC(C)CC(=O)OC1CC2(COC(C)=O)C(OC3C(O)C(O)C2(C)C34CO4)C=C1C	Lipids and lipid-like molecules	Prenol lipids	Sesquiterpenoids		0.727	201388
NEG_3535	13.018	309.288	trans-11-Eicosenoic acid	[M-H]-	C20H38O2	BITHHVVYSMSWAG-MDZDMXLPSA-N	CCCCCCCCC=CCCCCCCCCCC(O)=O	Lipids and lipid-like molecules	Fatty Acyls	Fatty acids and conjugates	C16526	0.782	766314
NEG_844	3.394	179.039	trans-5-O-Caffeoylquinic acid	[M-H]-	C16H18O9	CWVRJTMFETXNAD-PCNKEKKESA-N	O[C@@H]1C[C@](O)(C[C@@H](OC(=O)\\C=C\\C2=CC=C(O)C(=C2)O)[C@@H]1O)C(O)=O	Organic oxygen compounds	Organooxygen compounds	Alcohols and polyols		0.734	221652
NEG_8840	4.204	527.093	Tricin 5-glucoside	[M+Cl]-	C23H24O12	FLSOTPIEFVBPBU-LDBVRRDLSA-N	COC1=CC(=CC(=C1O)OC)C2=CC(=O)C3=C(OC4OC(CO)C(O)C(O)C4O)C=C(O)C=C3O2	Phenylpropanoids and polyketides	Flavonoids	Flavonoid glycosides		0.86	322991
NEG_1238	3.015	203.087	Tryptophan	[M-H]-	C11H12N2O2	QIVBCDIJIAJPQS-VIFPVBQESA-N	NC(CC1=C[NH]C2=C1C=CC=C2)C(O)=O	Organoheterocyclic compounds	Indoles and derivatives	Indolyl carboxylic acids and derivatives	C00078	0.835	243790
NEG_884	0.861	180.07	Tyrosine	[M-H]-	C9H11NO3	OUYCCCASQSFEME-QMMMGPOBSA-N	NC(CC1=CC=C(O)C=C1)C(O)=O	Organic acids and derivatives	Carboxylic acids and derivatives	Amino acids, peptides, and analogues	C00082	0.765	102856
NEG_12640	6.267	725.19	Vaccarin	[M-H]-	C32H38O19	GYIKGLVKALOGDP-QYUWKIGISA-N	C1[C@@H]([C@@H]([C@H]([C@@H](O1)O[C@@H]2[C@H]([C@@H]([C@H](OC2C3=C(C4=C(C=C3O)OC(=CC4=O)C5=CC=C(C=C5)O[C@H]6[C@@H]([C@H]([C@@H]([C@H](O6)CO)O)O)O)O)CO)O)O)O)O)O					0.719	42448
NEG_494	4.015	151.043	Vanillin	[M-H]-	C8H8O3	MWOOGOJBHIARFG-UHFFFAOYSA-N	COC1=CC(=CC=C1O)C=O	Benzenoids	Phenols	Methoxyphenols	C00755	0.716	30208
NEG_6540	5.234	431.107	Vitexin	[M-H]-	C21H20O10	SGEWCQFRYRRZDC-YJQKKJGLSA-N	OCC1OC([C@H](O)[C@H](O)C1O)C2=C3OC(=CC(=O)C3=C(O)C=C2O)C4=CC=C(O)C=C4	Phenylpropanoids and polyketides	Flavonoids	Flavonoid glycosides		0.873	3717681
NEG_10016	5.267	577.168	Vitexin rhamnoside	[M-H]-	C27H30O14	LYGPBZVKGHHTIE-QRIAMTHQSA-N	C[C@@H]1[C@H]([C@@H]([C@@H]([C@H](O1)O[C@H]2[C@@H]([C@H]([C@@H](O[C@@H]2C3=C(C=C(C4=C3OC(=CC4=O)C5=CC=C(C=C5)O)O)O)CO)O)O)O)O)O					0.836	12020530
NEG_12312	10.484	703.387	Voacamine	[M-H]-	C43H52N4O5	VCMIRXRRQJNZJT-UHFFFAOYNA-N	CCC1CC2CN3CCC4=C([NH]C5=CC(=C(OC)C=C45)C6CC7C(C(CC8=C6[NH]C9=CC=CC=C89)N(C)CC7=CC)C(=O)OC)C(C2)(C13)C(=O)OC	Alkaloids and derivatives	Ibogan-type alkaloids			0.721	34208
NEG_2816	1.782	283.073	Xanthosine	[M-H]-		UBORTCNDUKBEOP-UUOKFMHZSA-N	OCC1OC(C(O)C1O)[N]2C=NC3=C2N=C(O)N=C3O	Nucleosides, nucleotides, and analogues	Purine nucleosides		C01762	0.761	17634
NEG_7506	7.158	469.238	Xyl(b1-6)Glc(b)-O-octyl	[M+FA-H]-	C19H36O10	IBSNNVHJJNLMJW-BMVMOQKNSA-N	CCCCCCCCO[C@@H]1O[C@H](CO[C@@H]2OC[C@@H](O)[C@H](O)[C@H]2O)[C@@H](O)[C@H](O)[C@H]1O	Lipids and lipid-like molecules	Fatty Acyls	Fatty acyl glycosides		0.732	331106
